# Supplementary material for: The Impact of the First and Second Wave of the COVID-19 Pandemic on Eating Symptoms and Dysfunctional Eating Behaviours in the General Population: A Systematic Review and Meta-Analysis
Source: MDPI journal article supplement (doi:10.3390/nu15163607), 2023-08-17
Supplement: s1 [file s1]

## Supplementary Materials

### Supplementary Table S1

*Search strategy for each database*

| Database | Search strategy                                                                                                                                                                                                                                                                                                                                                                                                                                                                                                                                                                                                                                                                                                                                                                                                                                                                                                                                                                                                                                                                                                  |
|----------|------------------------------------------------------------------------------------------------------------------------------------------------------------------------------------------------------------------------------------------------------------------------------------------------------------------------------------------------------------------------------------------------------------------------------------------------------------------------------------------------------------------------------------------------------------------------------------------------------------------------------------------------------------------------------------------------------------------------------------------------------------------------------------------------------------------------------------------------------------------------------------------------------------------------------------------------------------------------------------------------------------------------------------------------------------------------------------------------------------------|
| PubMed   | ((overweight) OR (weight gain) OR (feeding) OR (food restriction) OR (undereating) OR (food avoidance) OR (appetite loss) OR (fear of weight gain) OR (feeling fat) OR (body shape concern) OR (body dissatisfaction) OR (body misperception) OR (weight loss) OR (excessive physical activity) OR (excessive exercise) OR (compulsive exercise) OR (caloric compensation) OR (compensatory behaviours) OR (vomit) OR (bingeing) OR (binge eating) OR (overeating) OR (food craving) OR (snacking) OR (night eating) OR (night feeding) OR (emotional eating)) AND ((COVID) OR (COVID) 19" OR (COVID)-2019) OR (pandemic*) OR (SARSCoV2) OR (SARS-CoV) OR (coronavirus disease) OR (coronavirus) OR (Coronavirus Infections) OR (novel coronavirus) OR (HCoV) OR (severe acute respiratory syndrome coronavirus 2)) AND ((Lockdown) OR (lock-down) OR (Confinement) OR (Home-confinement) OR (Containment) OR (Quarantine) OR (Isolation) OR (social distancing) OR (physical distancing) OR (social isolation pandemic restrictions) OR (pandemic restriction) OR (physical Inactivity) OR (physical Inactive)) |
| Embase   | (overweight OR weight gain OR feeding OR food restriction OR undereating OR food avoidance OR appetite loss OR fear of weight gain OR feeling fat OR body shape concern OR body dissatisfaction OR body misperception OR weight loss OR excessive physical activity OR excessive exercise OR compulsive exercise OR caloric compensation OR compensatory behaviours OR vomit OR bingeing OR binge eating OR overeating OR food craving OR snacking OR night eating OR night feeding OR emotional eating) AND (COVID OR COVID 19 OR COVID-2019 OR pandemic* OR SARSCoV2 OR SARS-CoV OR coronavirus disease OR coronavirus OR Coronavirus Infections OR novel coronavirus OR HCoV OR severe acute respiratory syndrome coronavirus 2) AND (Lockdown OR lock-down OR Confinement OR Home-confinement OR Containment OR Quarantine OR Isolation OR social distancing OR physical distancing OR social                                                                                                                                                                                                                |

|                |                                                                                                                                                                                                                                                                                                                                                                                                                                                                                                                                                                                                                                                                                                                                                                                                                                                                                                                                                                                                                                                                                                          |
|----------------|----------------------------------------------------------------------------------------------------------------------------------------------------------------------------------------------------------------------------------------------------------------------------------------------------------------------------------------------------------------------------------------------------------------------------------------------------------------------------------------------------------------------------------------------------------------------------------------------------------------------------------------------------------------------------------------------------------------------------------------------------------------------------------------------------------------------------------------------------------------------------------------------------------------------------------------------------------------------------------------------------------------------------------------------------------------------------------------------------------|
|                | isolation pandemic restrictions OR pandemic restriction OR physical Inactivity OR physical Inactive)                                                                                                                                                                                                                                                                                                                                                                                                                                                                                                                                                                                                                                                                                                                                                                                                                                                                                                                                                                                                     |
| Web of Science | (overweight OR weight gain OR feeding OR food restriction OR undereating OR food avoidance OR appetite loss OR fear of weight gain OR feeling fat OR body shape concern OR body dissatisfaction OR body misperception OR weight loss OR excessive physical activity OR excessive exercise OR compulsive exercise OR caloric compensation OR compensatory behaviours OR vomit OR bingeing OR binge eating OR overeating OR food craving OR snacking OR night eating OR night feeding OR emotional eating) AND (COVID OR COVID 19 OR COVID-2019 OR pandemic* OR SARSCoV2 OR SARS-CoV OR coronavirus disease OR coronavirus OR Coronavirus Infections OR novel coronavirus OR HCoV OR severe acute respiratory syndrome coronavirus 2) AND (Lockdown OR lock-down OR Confinement OR Home-confinement OR Containment OR Quarantine OR Isolation OR social distancing OR physical distancing OR social isolation pandemic restrictions OR pandemic restriction OR physical Inactivity OR physical Inactive)                                                                                                   |
| Scopus         | “overweight” OR “weight gain” OR “feeding” OR “food restriction” OR “undereating” OR “food avoidance” OR “appetite loss” OR “fear of weight gain” OR “feeling fat” OR “body shape concern” OR “body dissatisfaction” OR “body misperception” OR “weight loss” OR “excessive physical activity” OR “excessive exercise” OR “compulsive exercise” OR “caloric compensation” OR “compensatory behaviours” OR “vomit” OR “bingeing” OR “binge eating” OR “overeating” OR “food craving” OR “snacking” OR “night eating” OR “night feeding” OR “emotional eating” AND “COVID” OR “COVID 19” OR “COVID-2019” OR “pandemic*” OR “SARSCoV2” OR “SARS-CoV” OR “coronavirus disease” OR “coronavirus” OR “Coronavirus Infections” OR “novel coronavirus” OR “HCoV” OR “severe acute respiratory syndrome coronavirus 2” AND “Lockdown” OR “lock-down” OR “Confinement” OR “Home-confinement” OR “Containment” OR “Quarantine” OR “Isolation” OR “social distancing” OR “physical distancing” OR “social isolation pandemic restrictions” OR “pandemic restriction” OR “physical Inactivity” OR “physical Inactive” |

## Supplementary Materials

### Supplementary Table S2

#### *Quality assessment of included studies*

| author, date                | study design    | Representativeness of the sample | Sample size | Non-respondents | Ascertainment of the exposure | Confounders | Assessment of the outcome | Statistical analyses | Independent longitudinal assessment | Total score | Risk of bias |
|-----------------------------|-----------------|----------------------------------|-------------|-----------------|-------------------------------|-------------|---------------------------|----------------------|-------------------------------------|-------------|--------------|
| Abdulsalam et al., 2021     | retrospective   | 0                                | 0           | 0               | 1                             | 1           | 0                         | 1                    | 1                                   | 4           | High         |
| Abed Alah et al., 2021      | cross sectional | 0                                | 1           | 0               | 1                             | 1           | 0                         | 1                    | 0                                   | 4           | High         |
| Agurto et al., 2021         | cross sectional | 0                                | 0           | 0               | 1                             | 0           | 1                         | 1                    | 0                                   | 3           | High         |
| Al Domi et al., 2021        | cross sectional | 0                                | 1           | 0               | 1                             | 1           | 1                         | 1                    | 0                                   | 5           | Medium       |
| Al Musharaf, 2020           | cross sectional | 1                                | 1           | 0               | 1                             | 2           | 1                         | 1                    | 0                                   | 7           | Low          |
| Al Musharaf et al., 2021    | longitudinal    | 0                                | 1           | 0               | 1                             | 2           | 1                         | 1                    | 1                                   | 7           | Low          |
| Al Saleh et al., 2021       | cross sectional | 1                                | 1           | 0               | 1                             | 1           | 1                         | 1                    | 0                                   | 6           | Medium       |
| Alafif et al., 2021         | cross sectional | 1                                | 1           | 0               | 1                             | 1           | 1                         | 1                    | 0                                   | 6           | Medium       |
| Aldhuwayhi et al., 2022     | cross sectional | 0                                | 0           | 0               | 1                             | 1           | 0                         | 1                    | 0                                   | 3           | High         |
| Alfawaz et al., 2021        | retrospective   | 0                                | 1           | 0               | 1                             | 1           | 1                         | 1                    | 1                                   | 6           | Medium       |
| Ali et al., 2021            | cross sectional | 1                                | 1           | 0               | 1                             | 1           | 1                         | 1                    | 0                                   | 6           | Medium       |
| AlMughamis et al., 2020     | cross sectional | 0                                | 0           | 0               | 1                             | 1           | 0                         | 1                    | 0                                   | 3           | High         |
| AlTarrah et al., 2021       | cross sectional | 0                                | 1           | 0               | 1                             | 1           | 1                         | 1                    | 0                                   | 5           | Medium       |
| Álvarez-Gómez et al., 2021  | cross sectional | 0                                | 0           | 0               | 1                             | 1           | 0                         | 1                    | 0                                   | 3           | High         |
| Ammar et al., 2020          | retrospective   | 0                                | 1           | 0               | 1                             | 1           | 1                         | 1                    | 1                                   | 6           | Medium       |
| Arriola-Torres et al., 2021 | cross sectional | 0                                | 0           | 0               | 1                             | 1           | 0                         | 1                    | 0                                   | 3           | High         |

|                                        |                 |   |   |   |   |   |   |   |   |   |        |
|----------------------------------------|-----------------|---|---|---|---|---|---|---|---|---|--------|
| Baceviciene & Jankauskiene, 2021       | longitudinal    | 0 | 0 | 1 | 1 | 1 | 1 | 1 | 1 | 6 | Medium |
| Bajpeyi et al., 2021                   | cross sectional | 0 | 0 | 0 | 1 | 0 | 0 | 1 | 0 | 2 | High   |
| Bakhsh et al., 2021                    | cross sectional | 1 | 1 | 0 | 1 | 1 | 0 | 1 | 0 | 5 | Medium |
| Barcin-Güzeldere & Devrim-Lanpir, 2022 | cross sectional | 1 | 1 | 0 | 1 | 2 | 1 | 1 | 0 | 7 | Low    |
| Bemanian et al., 2020                  | cross sectional | 1 | 1 | 1 | 1 | 1 | 0 | 1 | 0 | 6 | Medium |
| Bhutani et al., 2021a                  | longitudinal    | 0 | 1 | 0 | 1 | 1 | 1 | 1 | 1 | 6 | Medium |
| Bhutani et al., 2021b                  | cross sectional | 0 | 1 | 0 | 1 | 1 | 1 | 1 | 0 | 5 | Medium |
| Bianchi et al., 2022                   | retrospective   | 1 | 1 | 0 | 1 | 1 | 1 | 1 | 1 | 7 | Low    |
| Bicer et al., 2021                     | retrospective   | 0 | 1 | 0 | 1 | 1 | 1 | 1 | 1 | 6 | Medium |
| Bin Zara et al., 2020                  | cross sectional | 0 | 1 | 0 | 1 | 2 | 1 | 1 | 0 | 6 | Medium |
| Błaszczuk-Bebenek et al., 2020         | retrospective   | 0 | 0 | 0 | 1 | 1 | 0 | 1 | 1 | 4 | High   |
| Boleslawska et al., 2021               | retrospective   | 0 | 0 | 0 | 1 | 0 | 0 | 1 | 1 | 3 | High   |
| Boukrim et al., 2021                   | cross sectional | 0 | 0 | 0 | 1 | 0 | 0 | 1 | 0 | 2 | High   |
| Breiner et al., 2021                   | retrospective   | 0 | 0 | 0 | 1 | 1 | 1 | 1 | 1 | 5 | Medium |
| Brito et al., 2021                     | cross sectional | 0 | 1 | 0 | 1 | 1 | 0 | 1 | 0 | 4 | High   |
| Buckland & Kemps, 2021                 | cross sectional | 0 | 1 | 0 | 1 | 0 | 1 | 1 | 0 | 4 | High   |
| Buckland et al., 2021                  | cross sectional | 0 | 1 | 0 | 1 | 1 | 1 | 1 | 0 | 5 | Medium |
| Buckley et al., 2021                   | cross sectional | 0 | 0 | 0 | 1 | 0 | 1 | 1 | 0 | 3 | High   |
| Cardi et al., 2021                     | cross sectional | 0 | 0 | 0 | 1 | 1 | 0 | 1 | 0 | 3 | High   |
| Carroll et al., 2020                   | cross sectional | 0 | 0 | 1 | 1 | 1 | 0 | 1 | 0 | 4 | High   |
| Caso et al., 2022                      | longitudinal    | 0 | 1 | 1 | 1 | 2 | 1 | 1 | 1 | 8 | Low    |

|                                      |                 |   |   |   |   |   |   |   |   |   |        |
|--------------------------------------|-----------------|---|---|---|---|---|---|---|---|---|--------|
| Castellini et al., 2020              | longitudinal    | 0 | 0 | 0 | 1 | 1 | 1 | 1 | 1 | 5 | Medium |
| Cecchetto et al., 2021               | longitudinal    | 0 | 0 | 0 | 1 | 1 | 1 | 1 | 1 | 5 | Medium |
| Chan & Chiu, 2022                    | cross sectional | 0 | 0 | 0 | 1 | 0 | 1 | 1 | 0 | 3 | High   |
| Chee et al., 2020                    | cross sectional | 0 | 0 | 0 | 1 | 1 | 1 | 1 | 0 | 4 | High   |
| Cheikh Ismail et al., 2020           | retrospective   | 0 | 1 | 1 | 1 | 1 | 1 | 1 | 1 | 7 | Low    |
| Cheikh Ismail, Hashim, et al., 2021a | cross sectional | 0 | 1 | 0 | 1 | 1 | 1 | 1 | 0 | 5 | Medium |
| Cheikh Ismail, Osaili, et al., 2021b | cross sectional | 0 | 1 | 0 | 1 | 1 | 1 | 1 | 0 | 5 | Medium |
| Chen et al., 2021                    | cross sectional | 1 | 0 | 1 | 1 | 1 | 1 | 1 | 0 | 6 | Medium |
| Cherick et al., 2020                 | cross sectional | 0 | 1 | 0 | 1 | 0 | 0 | 0 | 0 | 2 | High   |
| Christensen et al., 2021             | cross sectional | 0 | 0 | 0 | 0 | 1 | 1 | 1 | 0 | 3 | High   |
| Cirillo et al., 2021                 | retrospective   | 0 | 0 | 0 | 1 | 0 | 0 | 1 | 0 | 2 | High   |
| Coakley et al. 2021                  | cross sectional | 0 | 1 | 1 | 1 | 0 | 1 | 1 | 0 | 5 | Medium |
| Constant et al., 2020                | cross sectional | 1 | 1 | 1 | 0 | 1 | 0 | 0 | 0 | 4 | High   |
| Cooper et al., 2021                  | cross sectional | 0 | 1 | 0 | 1 | 1 | 1 | 1 | 0 | 5 | Medium |
| C. dos S. Costa et al., 2021         | longitudinal    | 1 | 1 | 1 | 1 | 1 | 1 | 0 | 1 | 7 | Low    |
| Costa M. L. et al., 2021             | cross sectional | 0 | 0 | 1 | 1 | 1 | 1 | 1 | 0 | 5 | Medium |
| Coulthard et al., 2021               | cross sectional | 0 | 0 | 1 | 1 | 1 | 1 | 1 | 0 | 5 | Medium |
| Cruceanu & Georgescu, 2021           | cross sectional | 0 | 0 | 0 | 1 | 0 | 0 | 0 | 0 | 1 | High   |
| Cummings et al., 2021                | cross sectional | 1 | 1 | 1 | 1 | 1 | 1 | 1 | 0 | 7 | Low    |
| Czepezor-Bernat et al., 2021         | cross sectional | 0 | 0 | 1 | 1 | 1 | 1 | 1 | 0 | 5 | Medium |
| Da Rocha et al., 2021                | longitudinal    | 0 | 0 | 0 | 1 | 0 | 0 | 0 | 0 | 1 | High   |

|                                  |                 |   |   |   |   |   |   |   |   |   |        |
|----------------------------------|-----------------|---|---|---|---|---|---|---|---|---|--------|
| De Pasquale et al., 2021         | cross sectional | 0 | 0 | 0 | 1 | 1 | 1 | 1 | 0 | 4 | High   |
| Deschasaux-Tanguy et al., 2021   | cross sectional | 1 | 1 | 1 | 1 | 1 | 0 | 1 | 1 | 7 | Low    |
| Di Renzo et al., 2020            | cross sectional | 1 | 0 | 1 | 1 | 1 | 1 | 1 | 0 | 6 | Medium |
| Dicken et al., 2021              | longitudinal    | 0 | 1 | 1 | 1 | 1 | 0 | 1 | 0 | 5 | Medium |
| Dobrowolski & Włodarek, 2021     | cross sectional | 1 | 0 | 0 | 0 | 0 | 0 | 0 | 0 | 1 | High   |
| Đogaš et al., 2020               | cross sectional | 1 | 1 | 1 | 1 | 0 | 0 | 1 | 0 | 5 | Medium |
| Dores et al., 2021               | cross sectional | 1 | 1 | 1 | 1 | 1 | 1 | 1 | 0 | 7 | Low    |
| Dor-Haim et al., 2021            | cross sectional | 0 | 1 | 0 | 1 | 1 | 0 | 1 | 0 | 4 | High   |
| dos Santos Quaresma et al., 2021 | cross sectional | 1 | 1 | 0 | 1 | 1 | 1 | 1 | 0 | 6 | Medium |
| Dragun et al., 2020              | cross sectional | 0 | 1 | 0 | 1 | 1 | 0 | 0 | 1 | 4 | High   |
| Drieskens et al., 2021           | cross sectional | 1 | 1 | 0 | 1 | 1 | 0 | 1 | 0 | 5 | Medium |
| Drywień et al., 2020             | cross sectional | 0 | 1 | 1 | 1 | 1 | 0 | 1 | 0 | 5 | Medium |
| Du et al., 2022                  | cross sectional | 0 | 1 | 0 | 1 | 0 | 0 | 1 | 0 | 3 | High   |
| Dun et al., 2021                 | longitudinal    | 0 | 1 | 1 | 1 | 0 | 0 | 1 | 1 | 5 | Medium |
| Ekpanyaskul & Padungtod, 2021    | cross sectional | 0 | 1 | 0 | 1 | 0 | 0 | 1 | 0 | 3 | High   |
| Elangovan et al., 2020           | cross sectional | 0 | 1 | 1 | 1 | 0 | 0 | 1 | 0 | 4 | High   |
| Elmacioğlu et al., 2021          | cross sectional | 1 | 1 | 0 | 1 | 1 | 1 | 1 | 0 | 6 | Medium |
| Enriquez-Martinez et al., 2021   | cross sectional | 1 | 1 | 1 | 1 | 0 | 0 | 1 | 0 | 5 | Medium |
| Flaudias et al., 2020            | cross sectional | 0 | 1 | 0 | 1 | 0 | 1 | 1 | 0 | 4 | High   |
| Freitas et al., 2021             | longitudinal    | 0 | 0 | 1 | 1 | 0 | 1 | 1 | 1 | 5 | Medium |
| Gao et al., 2022                 | cross sectional | 0 | 1 | 0 | 1 | 1 | 1 | 1 | 0 | 5 | Medium |
| Grant et al., 2021               | cross sectional | 0 | 1 | 0 | 1 | 0 | 0 | 0 | 0 | 2 | High   |

|                               |                 |   |   |   |   |   |   |   |   |   |        |
|-------------------------------|-----------------|---|---|---|---|---|---|---|---|---|--------|
| Guerrini Usubini et al., 2021 | cross sectional | 0 | 0 | 0 | 1 | 1 | 1 | 1 | 0 | 4 | High   |
| Jackson A. M. et al., 2022    | cross sectional | 0 | 0 | 0 | 1 | 1 | 0 | 1 | 0 | 3 | High   |
| Jackson A. et al., 2021       | cross sectional | 0 | 0 | 0 | 0 | 1 | 1 | 1 | 0 | 3 | High   |
| Jordan et al., 2021           | cross sectional | 0 | 0 | 0 | 0 | 1 | 1 | 1 | 0 | 3 | High   |
| Karakose et al., 2021         | cross sectional | 0 | 0 | 0 | 1 | 0 | 1 | 1 | 0 | 3 | High   |
| Kaufman-Shriqui et al., 2022  | cross sectional | 0 | 1 | 0 | 0 | 0 | 0 | 1 | 0 | 2 | High   |
| Kesilmi et al., 2021          | cross sectional | 0 | 0 | 0 | 0 | 0 | 1 | 1 | 0 | 2 | High   |
| Khubchandani et al., 2020     | cross sectional | 0 | 0 | 0 | 0 | 0 | 0 | 1 | 0 | 1 | High   |
| Landaeta-Díaz et al., 2021    | cross sectional | 1 | 1 | 1 | 0 | 1 | 0 | 1 | 0 | 5 | Medium |
| León-Paucar et al., 2021      | cross sectional | 0 | 0 | 0 | 0 | 1 | 1 | 1 | 0 | 3 | High   |
| Liboredo et al., 2021         | cross sectional | 0 | 1 | 1 | 1 | 1 | 1 | 1 | 0 | 6 | Medium |
| Li et al., 2021               | longitudinal    | 1 | 1 | 1 | 0 | 1 | 1 | 1 | 1 | 7 | Low    |
| Lofrano-Prado, et al., 2021   | cross sectional | 0 | 1 | 1 | 0 | 0 | 0 | 1 | 0 | 3 | High   |
| Ma et al., 2021               | cross sectional | 1 | 1 | 0 | 1 | 1 | 0 | 1 | 0 | 5 | Medium |
| Madali, et al., 2021          | cross sectional | 0 | 1 | 0 | 1 | 0 | 1 | 1 | 0 | 4 | High   |
| Madan et al., 2021            | longitudinal    | 0 | 1 | 0 | 1 | 1 | 0 | 1 | 0 | 4 | High   |
| Maffoni et al., 2021          | cross sectional | 0 | 1 | 1 | 0 | 0 | 0 | 1 | 0 | 3 | High   |
| Mahar et al., 2021            | cross sectional | 0 | 0 | 0 | 0 | 0 | 1 | 1 | 0 | 2 | High   |
| Malkawi et al., 2021          | cross sectional | 0 | 1 | 0 | 0 | 0 | 0 | 1 | 0 | 2 | High   |
| Martínez-de-Quel et al., 2021 | longitudinal    | 0 | 0 | 0 | 0 | 1 | 1 | 1 | 1 | 4 | High   |
| Mason et al., 2021            | cross sectional | 0 | 1 | 1 | 0 | 1 | 0 | 1 | 1 | 5 | Medium |
| Mazzolani et al. 2021         | longitudinal    | 0 | 1 | 1 | 1 | 2 | 1 | 1 | 1 | 8 | Low    |
| McAtamney et al., 2021        | cross sectional | 0 | 0 | 1 | 0 | 1 | 1 | 1 | 0 | 4 | High   |

|                                  |                 |   |   |   |   |   |   |   |   |   |        |
|----------------------------------|-----------------|---|---|---|---|---|---|---|---|---|--------|
| Micheletti Cremasco et al., 2021 | cross sectional | 0 | 1 | 1 | 1 | 1 | 0 | 1 | 0 | 5 | Medium |
| Molina-Montes et al., 2021       | cross sectional | 1 | 1 | 0 | 1 | 0 | 1 | 1 | 0 | 5 | Medium |
| Mota et al., 2021                | cross sectional | 1 | 1 | 0 | 1 | 1 | 0 | 1 | 0 | 5 | Medium |
| Mulugeta et al., 2021            | longitudinal    | 0 | 1 | 1 | 0 | 1 | 0 | 1 | 1 | 5 | Medium |
| Mumena, 2020                     | retrospective   | 1 | 1 | 1 | 0 | 0 | 0 | 1 | 0 | 4 | High   |
| Nitu et al., 2021                | longitudinal    | 1 | 0 | 1 | 0 | 0 | 0 | 1 | 0 | 3 | High   |
| Özcan & Yeşilkaya, 2021          | cross sectional | 1 | 0 | 0 | 0 | 1 | 1 | 1 | 0 | 4 | High   |
| Özden & Parlar Kiliç, 2021       | cross sectional | 0 | 1 | 1 | 0 | 1 | 1 | 1 | 0 | 5 | Medium |
| Özen et al., 2021                | cross sectional | 0 | 0 | 0 | 0 | 1 | 1 | 1 | 0 | 3 | High   |
| Ozenoglu et al., 2021            | cross sectional | 0 | 0 | 0 | 0 | 1 | 1 | 1 | 0 | 3 | High   |
| Pak et al., 2022                 | cross sectional | 0 | 0 | 0 | 1 | 1 | 1 | 1 | 0 | 4 | High   |
| Palmer et al., 2021              | retrospective   | 0 | 1 | 1 | 0 | 1 | 0 | 1 | 0 | 4 | High   |
| Pappa et al., 2021               | cross sectional | 0 | 0 | 0 | 0 | 1 | 0 | 1 | 0 | 2 | High   |
| Pertuz-Cruz et al., 2021         | cross sectional | 0 | 1 | 0 | 0 | 1 | 0 | 1 | 0 | 3 | High   |
| Phillipou et al., 2020           | cross sectional | 0 | 1 | 0 | 0 | 1 | 1 | 1 | 0 | 4 | High   |
| Phillipou et al., 2021           | cross sectional | 0 | 1 | 0 | 0 | 0 | 1 | 1 | 0 | 3 | High   |
| Pirutinsky et al., 2021          | cross sectional | 0 | 1 | 0 | 0 | 0 | 1 | 1 | 0 | 3 | High   |
| Pisot et al., 2020               | cross sectional | 0 | 1 | 0 | 0 | 1 | 0 | 1 | 0 | 3 | High   |
| Poelman et al., 2021             | cross sectional | 0 | 1 | 0 | 0 | 1 | 1 | 1 | 0 | 4 | High   |
| Pompili et al., 2022             | cross sectional | 0 | 0 | 0 | 0 | 1 | 0 | 1 | 0 | 2 | High   |
| Pop et al., 2021                 | longitudinal    | 0 | 0 | 0 | 0 | 0 | 0 | 1 | 1 | 2 | High   |
| Prezotti et al., 2021            | cross sectional | 0 | 0 | 1 | 1 | 0 | 0 | 0 | 0 | 2 | High   |
| Puhl et al., 2020                | longitudinal    | 0 | 0 | 1 | 1 | 2 | 1 | 1 | 1 | 7 | Low    |
| Queiroz et al., 2021             | cross sectional | 0 | 0 | 0 | 1 | 1 | 1 | 1 | 0 | 4 | High   |
| Radwan et al., 2021              | cross sectional | 1 | 1 | 1 | 1 | 1 | 0 | 1 | 0 | 6 | Medium |



|                              |                 |   |   |   |   |   |   |   |   |   |        |
|------------------------------|-----------------|---|---|---|---|---|---|---|---|---|--------|
| Ramalho et al., 2022         | cross sectional | 0 | 0 | 0 | 1 | 1 | 1 | 1 | 0 | 4 | High   |
| Reyes-Olavarria et al., 2020 | cross sectional | 0 | 1 | 0 | 1 | 1 | 0 | 1 | 0 | 4 | High   |
| Robertson et al., 2021       | cross sectional | 0 | 0 | 0 | 1 | 1 | 0 | 1 | 0 | 3 | High   |
| Robinson et al., 2021        | cross sectional | 1 | 1 | 1 | 1 | 2 | 1 | 1 | 0 | 8 | Low    |
| Robinson et al., 2020        | cross sectional | 1 | 1 | 1 | 1 | 1 | 0 | 1 | 0 | 6 | Medium |
| Rodriguez-Perez et al., 2020 | cross sectional | 0 | 1 | 1 | 1 | 1 | 1 | 1 | 0 | 6 | Medium |
| Rogers et al., 2021          | longitudinal    | 0 | 0 | 0 | 1 | 1 | 1 | 1 | 1 | 5 | Medium |
| Ruiz-Zaldibar, et al., 2022  | cross sectional | 1 | 0 | 0 | 0 | 1 | 1 | 1 | 0 | 4 | High   |
| Ruiz et al., 2021            | cross sectional | 1 | 1 | 1 | 1 | 0 | 1 | 0 | 0 | 5 | Medium |
| Sadler et al., 2021          | cross sectional | 1 | 0 | 1 | 1 | 1 | 1 | 1 | 0 | 6 | Medium |
| Sánchez et al., 2021         | cross sectional | 1 | 1 | 1 | 1 | 0 | 1 | 1 | 0 | 6 | Medium |
| Sánchez-Sánchez et al., 2020 | cross sectional | 1 | 1 | 1 | 1 | 0 | 1 | 1 | 1 | 7 | Low    |
| Sánchez-Sánchez et al., 2021 | cross sectional | 0 | 0 | 1 | 1 | 1 | 1 | 0 | 0 | 4 | High   |
| Santana et al., 2021         | cross sectional | 0 | 1 | 1 | 1 | 1 | 1 | 1 | 1 | 7 | Low    |
| Sarda et al., 2022           | cross sectional | 1 | 1 | 0 | 1 | 0 | 0 | 1 | 0 | 4 | High   |
| Saxena et al., 2021          | cross sectional | 0 | 0 | 0 | 1 | 0 | 0 | 0 | 0 | 1 | High   |
| Scacchi et al., 2021         | cross sectional | 1 | 1 | 1 | 1 | 0 | 1 | 1 | 0 | 6 | Medium |
| Scarmozzino & Visioli, 2020  | cross sectional | 1 | 1 | 1 | 1 | 0 | 0 | 0 | 0 | 4 | High   |
| Scharmer et al., 2020        | cross sectional | 1 | 0 | 0 | 1 | 0 | 1 | 1 | 0 | 4 | High   |

|                        |                 |   |   |   |   |   |   |   |   |   |        |
|------------------------|-----------------|---|---|---|---|---|---|---|---|---|--------|
| Schulte et al., 2022   | cross sectional | 0 | 0 | 1 | 1 | 0 | 1 | 1 | 0 | 4 | High   |
| Seal et al., 2022      | longitudinal    | 1 | 1 | 0 | 1 | 1 | 0 | 1 | 1 | 6 | Medium |
| Sebastião et al., 2022 | cross sectional | 0 | 0 | 0 | 1 | 1 | 0 | 1 | 0 | 3 | High   |
| Serin et al., 2020     | cross sectional | 0 | 1 | 0 | 1 | 0 | 1 | 1 | 0 | 4 | High   |
| Shaun et al., 2021     | retrospective   | 0 | 0 | 0 | 1 | 1 | 1 | 1 | 1 | 5 | Medium |
| Shibata et al., 2021   | cross sectional | 0 | 1 | 0 | 1 | 1 | 1 | 1 | 0 | 5 | Medium |
| Shin, 2021             | cross sectional | 0 | 0 | 0 | 1 | 1 | 0 | 1 | 0 | 3 | High   |
| Sidor et al., 2020     | cross sectional | 0 | 1 | 0 | 1 | 0 | 1 | 1 | 0 | 4 | High   |
| Silva et al., 2021     | cross sectional | 1 | 1 | 0 | 1 | 0 | 0 | 1 | 0 | 4 | High   |
| Silverman & Wang, 2021 | cross sectional | 0 | 0 | 0 | 1 | 0 | 1 | 1 | 1 | 4 | High   |
| Skotnicka et al., 2021 | retrospective   | 0 | 1 | 0 | 0 | 2 | 0 | 1 | 0 | 4 | High   |
| Smith et al., 2021     | cross sectional | 0 | 0 | 1 | 0 | 1 | 0 | 1 | 0 | 3 | High   |
| Sobba et al., 2021     | retrospective   | 0 | 1 | 1 | 0 | 1 | 0 | 1 | 0 | 4 | High   |
| Solè et al., 2021      | cross sectional | 0 | 0 | 0 | 1 | 1 | 0 | 1 | 0 | 3 | High   |
| Suka et al., 2021      | cross sectional | 1 | 1 | 1 | 1 | 1 | 1 | 1 | 0 | 7 | Low    |
| Sulejmani et al., 202  | cross sectional | 0 | 0 | 0 | 1 | 1 | 0 | 1 | 0 | 3 | High   |
| Swami et al., 2021     | cross sectional | 0 | 0 | 0 | 1 | 1 | 1 | 1 | 0 | 4 | High   |
| Tabler et al., 2021    | cross sectional | 0 | 0 | 1 | 1 | 0 | 1 | 1 | 1 | 5 | Medium |
| Tan et al., 2021       | retrospective   | 0 | 1 | 0 | 1 | 1 | 1 | 1 | 0 | 5 | Medium |
| Tfifha et al., 2021    | cross sectional | 0 | 0 | 0 | 1 | 1 | 0 | 1 | 0 | 3 | High   |
| Thahir et al., 2021    | cross sectional | 0 | 1 | 0 | 1 | 1 | 0 | 1 | 0 | 4 | High   |
| Trott et al., 2021     | longitudinal    | 0 | 0 | 0 | 1 | 0 | 1 | 1 | 1 | 4 | High   |
| Turgut et al., 2020    | cross sectional | 0 | 0 | 0 | 1 | 0 | 1 | 1 | 0 | 3 | High   |
| Urzeala et al., 2022   | longitudinal    | 0 | 1 | 0 | 1 | 1 | 1 | 1 | 1 | 6 | Medium |
| Vacca et al., 2021     | cross sectional | 0 | 1 | 0 | 1 | 1 | 1 | 1 | 0 | 5 | Medium |
| Valencia et al., 2021  | cross sectional | 0 | 0 | 0 | 1 | 0 | 0 | 1 | 0 | 2 | High   |

|                              |                 |   |   |   |   |   |   |   |   |   |        |
|------------------------------|-----------------|---|---|---|---|---|---|---|---|---|--------|
| Vidal et al., 2021           | cross sectional | 0 | 1 | 0 | 1 | 0 | 1 | 1 | 0 | 4 | High   |
| Visser et al., 2020          | cross sectional | 1 | 1 | 1 | 1 | 1 | 1 | 1 | 1 | 8 | Low    |
| Wang et al., 2022            | cross sectional | 0 | 0 | 0 | 1 | 1 | 1 | 1 | 0 | 4 | High   |
| Yang et al., 2020            | longitudinal    | 0 | 1 | 0 | 1 | 0 | 1 | 1 | 1 | 5 | Medium |
| Yılmaz Akyüz et al., 2021    | cross sectional | 0 | 1 | 0 | 1 | 1 | 1 | 1 | 0 | 5 | Medium |
| Yılmaz & Sanlier, 2021       | cross sectional | 0 | 0 | 0 | 1 | 1 | 1 | 1 | 0 | 4 | High   |
| Yokoro & Wakimoto, 2021      | cross sectional | 0 | 0 | 1 | 1 | 0 | 0 | 1 | 0 | 3 | High   |
| Zach & Fernandez, 2021       | cross sectional | 0 | 0 | 0 | 1 | 1 | 0 | 1 | 0 | 3 | High   |
| Zachary et al., 2020         | cross sectional | 0 | 1 | 0 | 1 | 1 | 0 | 1 | 0 | 4 | High   |
| Zhang & Zhang, 2020          | cross sectional | 0 | 1 | 1 | 1 | 1 | 1 | 1 | 0 | 6 | Medium |
| Zhou & Wade, 2021            | longitudinal    | 0 | 1 | 1 | 1 | 1 | 1 | 1 | 1 | 7 | Low    |
| Zhu et al., 2021             | retrospective   | 0 | 0 | 1 | 1 | 1 | 0 | 1 | 0 | 4 | High   |
| Zielinska & Luszczycki, 2021 | cross sectional | 0 | 1 | 0 | 1 | 1 | 1 | 1 | 0 | 5 | Medium |

## Supplementary Table S3

### *Summary of characteristics of included studies*

| author, date             | country      | recruitment time                                              | N    | Female, n (%)* | Age, n/mean* | Type of sample | BMI   | data collection | Outcome definition                                                                 | Outcome assessment                                                                                       |
|--------------------------|--------------|---------------------------------------------------------------|------|----------------|--------------|----------------|-------|-----------------|------------------------------------------------------------------------------------|----------------------------------------------------------------------------------------------------------|
| Abdulsalam et al., 2021  | Saudi Arabia | COVID-19 curfew period                                        | 472  | 321 (68)       | na           | Adults         | na    | Online survey   | Weight Gain; Weight Loss; Excessive physical activity; Night eating                | Single item/ad hoc questionnaire                                                                         |
| Abed Alah et al., 2021   | Qatar        | December, 2020 - February, 2021                               | 1408 | 580 (41.2)     | na           | Adults         | na    | Online survey   | Weight Gain                                                                        | Single item/ad hoc questionnaire                                                                         |
| Agurto et al., 2021      | Peru         | July 2020                                                     | 686  | 569 (82.9)     | na           | Adults         | 25.97 | Online survey   | Weight Gain                                                                        | Eating Habits Questionnaire                                                                              |
| Al Domi et al., 2021     | Jordania     | March, 2020 – April, 2020                                     | 4473 | 3086 (70.3)    | na           | Adults         | na    | Online survey   | Weight Gain; Weight Loss; Excessive physical activity; Snacking; Increase Appetite | Single item/ad hoc questionnaire                                                                         |
| Al Musharaf, 2020        | Saudi Arabia | May 18, 2020 - May 28, 2020                                   | 638  | 638 (100)      | 22.0         | Women          | 23.2  | Online survey   | Emotional eating                                                                   | Emotional Eating Scale                                                                                   |
| Al Musharaf et al., 2021 | Saudi Arabia | T1: February, 2019 - April, 2019; T2: April, 2020 – May, 2020 | 297  | 297 (100)      | 20.7         | Women          | 23.0  | Phone interview | Weight Gain                                                                        | Saudi Food and Drug Administration's food frequency questionnaire (SFDA-FFQ)                             |
| Al Saleh et al., 2021    | Saudi Arabia | March 15, 2020 – April 30, 2020                               | 1641 | 908 (55.3)     | na           | Adults         | na    | Online survey   | Weight Gain; Weight Loss; Excessive physical activity                              | Single item/ad hoc questionnaire                                                                         |
| Alafif et al., 2021      | Saudi Arabia | March 23, 2020 - June 21, 2020.                               | 733  | 577 (78.7)     | 21           | Students       | na    | Online survey   | Weight Gain; Snacking; Emotional eating                                            | COVIDiet Questionnaire, Mediterranean Diet Adherence Screener (MEDAS); Three-Factor Eating Questionnaire |
| Aldhuwayhi et al., 2022  | Saudi Arabia | na                                                            | 206  | 63 (31)        | na           | Students       | na    | Online survey   | Binge Eating                                                                       | Single item/ad hoc questionnaire                                                                         |
| Alfawaz et al., 2021     | Saudi Arabia | May 11, 2020 - June 6, 2020                                   | 1965 | 1044 (53.0)    | na           | Adults         | na    | Online survey   | Excessive physical activity; Snacking                                              | Single item/ad hoc questionnaire                                                                         |
| Ali et al., 2021         | Pakistan     | na                                                            | 1956 | 1410 (72.1)    | na           | Adults         | na    | Online survey   | Weight Gain                                                                        | Single item/ad hoc questionnaire                                                                         |
| AlMughamis et al., 2020  | Kuwait       | April 2, 2020 – April 12, 2020                                | 522  | 380 (72.8)     | 11.75        | Adults         | na    | Online Survey   | Weight gain; Snacking; Excessive physical activity                                 | Single item/ad hoc questionnaire                                                                         |

|                                                   |                              |                                                                   |       |             |       |                |       |                     |                                                                              |                                                                                                                                |
|---------------------------------------------------|------------------------------|-------------------------------------------------------------------|-------|-------------|-------|----------------|-------|---------------------|------------------------------------------------------------------------------|--------------------------------------------------------------------------------------------------------------------------------|
| <b>AlTarrah et al., 2021</b>                      | Kuwait                       | July 28, 2020 - August 31, 2020                                   | 841   | 655 (77.9)  | na    | Adults         | na    | Online Survey       | Overeating; Undereating; Snacking                                            | Single item/ad hoc questionnaire                                                                                               |
| <b>Álvarez-Gómez et al., 2021</b>                 | Spain                        | March 15, 2021 -April 4, 2021                                     | 510   | 381 (74.7)  | 5.1   | Adults         | na    | Online Survey       | Overeating; Snacking; Physical activity; Weight gain; Weight loss            | Single item/ad hoc questionnaire                                                                                               |
| <b>Ammar et al. 2020</b>                          | Asia, Africa, Europe, others | April 1, 2020 - April 6. 2020.                                    | 1047  | 563 (53.8)  | na    | Adults         | na    | Online Survey       | Eating out of control; Snacks between meals                                  | International Physical Activity Questionnaire Short Form (IPAQ-SF); Short Diet Behaviours Questionnaire for Lockdowns (SDBQL); |
| <b>Arriola-Torres et al., 2021</b>                | Peru                         | July 01, 2020 – July 11, 2020                                     | 107   | 58 (54.6)   | 4.40  | Health Workers | na    | Online Survey       | Food cravings                                                                | Single item/ad hoc questionnaire                                                                                               |
| <b>Baceviciene &amp; Jankauskien e, 2021</b>      | Lithuania                    | T1: October 2019; T2: February 2021                               | 230   | 182 (79.1)  | 5.4   | Students       | 22.32 | Online Survey       | Disordered eating; overeating; Having unhealthy snacks; Eating late at night | EDE-Q 6.0; Sociocultural Attitudes Towards Appearance Questionnaire-4 (SATAQ-4)                                                |
| <b>Bajpeyi et al., 2021</b>                       | Texas                        | October-December 2020                                             | 58    | 48 (82.8)   | 6.8   | Older adults   | 29.7  | Telephone Interview | Weight gain; Weight loss                                                     | Single item/ad hoc questionnaire                                                                                               |
| <b>Bakhsh et al., 2021</b>                        | Saudi Arabia                 | June - July 2020                                                  | 2255  | 1453 (64)   | na    | Adults         | 28.1  | Online Survey       | Weight gain; Weight loss; Snacking; Overeating; Physical activity            | Single item/ad hoc questionnaire                                                                                               |
| <b>Barcin-Güzeldere &amp; Devrim-Lanpir, 2022</b> | Turkey                       | June - September 2020                                             | 506   | 387 (76.5)  | 11.48 | Adults         | 24.22 | Online Survey       | Emotional eating                                                             | Emotional Eater Questionnaire                                                                                                  |
| <b>Bemanian et al., 2020</b>                      | Norway                       | April 15, 2020 - April 30, 2020                                   | 24968 | 13982 (56)  | na    | Adults         | na    | Online Survey       | Emotional eating                                                             | Single item/ad hoc questionnaire                                                                                               |
| <b>Bhutani et al., 2021a</b>                      | USA                          | T0: 24 April to 4 May 2020<br>T1: 21 September to 13 October 2020 | 727   | 388 (53.37) | na    | Adults         | 26.38 | Online Survey       | Overweight, Weight Gain; Weight Loss; Food cravings; Snacking                | Control of Eating Questionnaire (CoEQ)                                                                                         |
| <b>Bhutani et al., 2021b</b>                      | USA                          | April 24, 2020 –May 4, 2020                                       | 1609  | 911 (56.62) | na    | Adults         | na    | Online Survey       | Food cravings                                                                | Control of Eating Questionnaire (CoEQ)                                                                                         |
| <b>Bianchi et al., 2022</b>                       | Italy                        | April 13, 2020 - May 19, 2020                                     | 1925  | 1384 (71.9) | 2.75  | Adults         | na    | Online Survey       | Bingeing, Binge Eating                                                       | Binge Eating Disorder Screener (BEDS-7)                                                                                        |
| <b>Bicer et al., 2021</b>                         | Turkey                       | March 15, 2020 -May 15, 2020                                      | 2955  | 2805 (94.9) | 10.34 | Adults         | 23.9  | Online Survey       | Weight gain; Weight loss; Cognitive Restriction;                             | Three Factor Eating Questionnaire (TFEQ)                                                                                       |

|                                       |               |                                            |      |             |       |                  |       |               | Emotional eating;<br>Uncontrolled eating                                                                          |                                                                                                                  |
|---------------------------------------|---------------|--------------------------------------------|------|-------------|-------|------------------|-------|---------------|-------------------------------------------------------------------------------------------------------------------|------------------------------------------------------------------------------------------------------------------|
| <b>Bin Zara et al., 2013</b>          | United States | April, 2020 – June, 2020                   | 3133 | 2462 (79.4) | na    | Adults           | 30.73 | Online Survey | Overweight, Weight Gain; Weight Loss; Excessive physical activity, Excessive exercise, Compulsive exercise; Vomit | Dana-Farber’s Cancer Institute Eating Habits Questionnaire; Yale Food Addiction Scale; USDA Food Security Module |
| <b>Blaszczyk-Bebenek et al., 2020</b> | Poland        | April 29, 2020- May 19, 2020               | 312  | 200 (64.1)  | 13.05 | Adults           | 25.28 | Online Survey | Weight gain; Weight loss                                                                                          | Single item/ad hoc questionnaire                                                                                 |
| <b>Boleslawska et al., 2021</b>       | Poland        | April 19, 2020 - May 19, 2020              | 312  | 200 (64.1)  | na    | Adults           | 24.78 | Online Survey | Weight gain; Weight loss                                                                                          | Single item/ad hoc questionnaire                                                                                 |
| <b>Boukrim et al., 2021</b>           | Morocco       | April 01, 2020 - June 10, 2020             | 406  | 302 (74.40) | 1.36  | Adults           | 24.26 | Online Survey | Weight gain                                                                                                       | Guideline Score of the French National Nutrition and Health Program (PNNS-GS)                                    |
| <b>Breiner et al., 2021</b>           | USA           | April 9, 2020 - May 27, 2020               | 159  | 144 (90.6)  | 11.68 | Adults           | na    | Online Survey | Weight gain                                                                                                       | Single item/ad hoc questionnaire                                                                                 |
| <b>Brito et al., 2021</b>             | Brazil        | the second half of May 2020                | 135  | 115 (85.9)  | na    | Adults           | na    | Online Survey | Weight gain                                                                                                       | Single item/ad hoc questionnaire                                                                                 |
| <b>Buckland &amp; Kemps, 2021</b>     | Australia     | August - September 2020                    | 124  | 147 (98)    | 12.9  | Adults           | na    | Online Survey | Snacking                                                                                                          | Control of Eating Questionnaire (COEQ); Three Factor Eating Questionnaire (TFEQ)                                 |
| <b>Buckland et al., 2021</b>          | UK            | May 15, 2020 - June 27, 2020               | 588  | 406 (69)    | 12.6  | Adults           | 25.1  | Online Survey | Snacking; Food cravings                                                                                           | Food Frequency Questionnaire (FFQ); Adult Eating Behaviour questionnaire (AEBQ)                                  |
| <b>Buckley et al., 2021</b>           | Australia     | April 29, 2020 - May 7, 2020               | 204  | 175 (85.8)  | 8.1   | Athletes         | na    | Online Survey | Body shape concern                                                                                                | Eating Attitudes Test-26 (EAT-26)                                                                                |
| <b>Cardi et al., 2021</b>             | Italy         | April 6, 2020 - May 4, 2020                | 292  | 196 (67.1)  | 14.23 | Adults           | na    | Online Survey | Overeating                                                                                                        | Single item/ad hoc questionnaire                                                                                 |
| <b>Carroll et al., 2020</b>           | Canada        | April 20, 2020 - May 15, 2020              | 361  | 235 (65)    | na    | Parents          | na    | Online Survey | Snacking                                                                                                          | Single item/ad hoc questionnaire                                                                                 |
| <b>Caso et al., 2022</b>              | Italy         | T1: April 30, 2020; T2: June 4, 2020       | 728  | 447 (61.4)  | 16.72 | Students         | na    | Online Survey | Feeding/food restriction; Emotional eating; Overeating                                                            | Dutch Eating Behavior Questionnaire (DEBQ)                                                                       |
| <b>Castellini et al., 2020</b>        | Italy         | T1: December 1, 2019; T2: January 15, 2020 | 97   | 97 (100)    | 10.89 | Healthy Controls | na    | Online Survey | Weight gain; Objective binge eating; Compensatory physical exercise                                               | Eating Disorder Examination Questionnaire, (EDE-Q)                                                               |

|                                             |                                     |                                               |       |              |       |                              |       |                  |                                                                                                                                       |                                                                                                                     |
|---------------------------------------------|-------------------------------------|-----------------------------------------------|-------|--------------|-------|------------------------------|-------|------------------|---------------------------------------------------------------------------------------------------------------------------------------|---------------------------------------------------------------------------------------------------------------------|
| <b>Cecchetto et al., 2021</b>               | Italy                               | May 14, 2020 - May 19, 2020                   | 365   | 267 (73.1)   | 13.59 | Adults                       | 23.08 | Online Survey    | Emotional eating; Bingeing, Binge Eating                                                                                              | Dutch Eating Behaviour Questionnaire investigating Emotional Eating (DEBQ); Binge-Eating Disorder Screener (BEDS-7) |
| <b>Chan &amp; Chiu, 2022</b>                | China                               | March - April 2020                            | 316   | 224 (70.9)   | 4.97  | Young Adults                 | na    | Online Survey    | Eating Disorders                                                                                                                      | Chinese version of the SCOFF questionnaire                                                                          |
| <b>Chee et al., 2020</b>                    | Canada                              | May-June 2020                                 | 680   | 510 (75)     | 14.7  | Adults                       | 25.5  | Online Survey    | Snacking                                                                                                                              | Beverage and Snack Questionnaire 2 (BSQ2)                                                                           |
| <b>Cheikh Ismail et al., 2020</b>           | Emirates                            | April-May 2020                                | 1012  | 768 (75.9)   | na    | Adults                       | na    | Online Survey    | Snacking; Excessive physical activity; Weight Gain; Weight Loss; Feeding/food restriction, Undereating, Food avoidance, Appetite Loss | Single item/ad hoc questionnaire                                                                                    |
| <b>Cheikh Ismail, Hashim, et al., 2021a</b> | Lebanon                             | June 3, 2020 - June 28, 2020                  | 2507  | 1830 (73)    | na    | Adults                       | na    | Online Survey    | Snacking; Excessive physical activity; Weight Gain; Weight Loss                                                                       | Short Food Frequency Questionnaire (FFQ); International Physical Activity Questionnaire Short Form (IPAQ-SF)        |
| <b>Cheikh Ismail, Osaili, et al., 2021b</b> | Middle East and North Africa region | April 15, 2020 - April 29, 2020               | 2970  | 2126 (71.6)  | na    | Adults                       | na    | Online Survey    | Snacking; Excessive physical activity; Weight Gain; Weight Loss                                                                       | Short Food Frequency Questionnaire (FFQ); International Physical Activity Questionnaire Short Form (IPAQ-SF)        |
| <b>Chen et al., 2021</b>                    | China                               | April 2020                                    | 616   | 375 (60.9)   | 16.3  | Adults                       | na    | Telephone survey | Weight Gain                                                                                                                           | Single item/ad hoc questionnaire                                                                                    |
| <b>Cherick et al., 2020</b>                 | France                              | na                                            | 1092  | na           | na    | Adults                       | na    | Online Survey    | Emotional Eating                                                                                                                      | Single item/ad hoc questionnaire                                                                                    |
| <b>Christensen et al., 2021</b>             | USA (Kansas)                        | 2 samples: December - March 2020 / April 2020 | 357   | 279 (78.2)   | 4.2   | Students                     | 25.0  | Online Survey    | Eating disorder symptoms                                                                                                              | Eating Disorder Diagnostic Scale (EDDS)                                                                             |
| <b>Cirillo et al., 2021</b>                 | Italy                               | April-May 2020                                | 140   | 140 (100)    | 5     | Women in fertility treatment | na    | Online Survey    | Emotional Eating                                                                                                                      | Single item/ad hoc questionnaire                                                                                    |
| <b>Coakley et al., 2021</b>                 | U.S.                                | September-October 2020                        | 1243  | 909 (73.1)   | na    | Students                     | na    | Online Survey    | Anxiety and appetitive traits                                                                                                         | Adult Eating Behavior Questionnaire (AEBQ)                                                                          |
| <b>Constant et al., 2020</b>                | France                              | April 2020                                    | 4005  | 2051 (51.2)  | na    | Adults                       | na    | Online Survey    | Physical Activity and snacking                                                                                                        | Single item/ad hoc questionnaire                                                                                    |
| <b>Cooper et al., 2021</b>                  | USA                                 | April-May 2020                                | 1607  | 916 (57)     | 12.9  | Adults                       | 26    | Online Survey    | Perceived caloric intake, overall PA, vigorous PA, snacking                                                                           | Single item/ad hoc questionnaire                                                                                    |
| <b>C. dos S. Costa et al., 2021</b>         | Brasil                              | January 2020                                  | 14259 | 11168 (78.3) | na    | Adults                       | na    | Online Survey    | Weight gain; Weight loss                                                                                                              | Single item/ad hoc questionnaire                                                                                    |
| <b>Costa L. et al., 2021</b>                | Brasil                              | December 2020 - January 2021                  | 598   | 387 (64.7)   | 12.32 | Adults                       | na    | Online Survey    | Emotional Eating; Body dissatisfaction                                                                                                | Three-factor eating questionnaire subscale (TFEQ-R21)                                                               |

|                                         |                 |                              |       |              |       |               |       |               |                                              |                                                                                             |
|-----------------------------------------|-----------------|------------------------------|-------|--------------|-------|---------------|-------|---------------|----------------------------------------------|---------------------------------------------------------------------------------------------|
| <b>Coulthard et al., 2021</b>           | UK              | na                           | 620   | 546 (88)     | na    | Adults        | na    | Online Survey | Emotional Eating; Eating behaviour           | Three-Factor Eating Questionnaire-Revised (TFEQ-R18)                                        |
| <b>Cruceanu &amp; Georgescu, 2021</b>   | Romania         | na                           | 103   | 67 (65)      | na    | Adults        | 25    | Online Survey | Physical Activity                            | Single item/ad hoc questionnaire                                                            |
| <b>Cummings, 2021</b>                   | USA             | February 2019 - March 2020   | 868   | 449 (51.9)   | 12.86 | Adults        | 25.99 | Online Survey | Eating behaviours                            | Modified Yale Food Addiction Scale 2.0 (mYFAS2.0)                                           |
| <b>Czepczor-Bernat et al., 2021</b>     | Poland          | December 2020 - January 2021 | 671   | 671 (100)    | 11.38 | women         | 24.78 | Online Survey | Eating disorder symptoms; Body image         | Eating Disorder Inventory (EDI); Multidimensional Body-Self Relations Questionnaire (MBSRQ) |
| <b>Da Rocha et al., 2021</b>            | Brasil          | December 2019 - January 2021 | 29    | 29 (100)     | 5.6   | Elderly Women | na    | na            | BMI; Body weight                             | Single item/ad hoc questionnaire                                                            |
| <b>De Pasquale et al., 2021</b>         | Italy           | March 2020 - February 2021   | 469   | 248 (52)     | 2.70  | Students      | na    | Online Survey | Eating disorder symptoms; Binge eating       | Eating Disorder Inventory-2 (EDI-2); Binge Eating Behaviors (BES)                           |
| <b>Deschasaux-Tanguy et al., 2021</b>   | France          | 2009 - 2019                  | 37252 | 19483 (52.3) | 16.6  | Adults        | na    | Online Survey | Weight change; Physical activity             | Single item/ad hoc questionnaire                                                            |
| <b>Di Renzo et al., 2020</b>            | Italy           | April - May 2020             | 602   | 480 (79.7)   | 12.9  | Adults        | 25    | Online Survey | Eating disorder behaviours; Emotional Eating | Yale Food Addiction Scale                                                                   |
| <b>Dicken et al., 2021</b>              | UK              | May - December 2020          | 1818  | 1267 (69.7)  | 14.3  | Adults        | 26.2  | Online Survey | Weight change; BMI                           | Single item/ad hoc questionnaire                                                            |
| <b>Dobrowolski &amp; Włodarek, 2021</b> | Poland          | na                           | 183   | 143 (78)     | 11    | Adults        | na    | Online Survey | Weight change; Physical activity             | Single item/ad hoc questionnaire                                                            |
| <b>Đogaš, Kalcina et al., 2020</b>      | Croatia         | April - May 2020             | 3017  | 2121 (70.3)  | na    | Adults        | 24.64 | Online Survey | Weight change                                | Single item/ad hoc questionnaire                                                            |
| <b>Dores et al., 2021</b>               | Portugal/Spain  | April-May 2020               | 3161  | 2046 (65.2)  | 12.10 | Adults        | na    | Online Survey | Exercise addiction                           | Exercise Addiction Inventory (EAI)                                                          |
| <b>Dor-Haim et al., 2021</b>            | Israel          | March-April 2020             | 1202  | 301 (25)     | 15.60 | Adults        | na    | Online Survey | Weight gain                                  | Single item/ad hoc questionnaire                                                            |
| <b>dos Santos Quaresma et al., 2021</b> | Brasil          | April-May 2020               | 724   | 585 (80.8)   | na    | Adults        | 25    | Online Survey | Emotional eating; Binge eating               | Three-factor eating questionnaire (TFEQ-R21)                                                |
| <b>Dragun et al., 2020</b>              | Croatia         | 2018- May 2020               | 557   | 372 (73)     | na    | Students      | 22.0  | Online Survey | Lifestyle and dietary habits                 | Single item/ad hoc questionnaire                                                            |
| <b>Drieskens et al., 2021</b>           | Belgium         | April 2020                   | 28029 | 18919 (67.5) | na    | Adults        | na    | Online Survey | Health behaviour; Weight gain                | Single item/ad hoc questionnaire                                                            |
| <b>Drywień et al., 2020</b>             | Poland          | April-May 2020               | 1769  | 1769 (100)   | na    | Women         | na    | Online Survey | Weight change                                | Single item/ad hoc questionnaire                                                            |
| <b>Du et al., 2021</b>                  | China, Ireland, | April-May 2020               | 2254  | 1502 (66.7)  | 5.5   | Students      | 24.4  | Online Survey | Dietary habits                               | Single item/ad hoc questionnaire                                                            |



|                                          |                                                                                            |                                          |       |              |       |                                 |                 |                                            |                                                                      |                                                                                                              |
|------------------------------------------|--------------------------------------------------------------------------------------------|------------------------------------------|-------|--------------|-------|---------------------------------|-----------------|--------------------------------------------|----------------------------------------------------------------------|--------------------------------------------------------------------------------------------------------------|
|                                          | Malaysia, South Korea, Taiwan, the Netherlands, and the United States                      |                                          |       |              |       |                                 |                 |                                            |                                                                      |                                                                                                              |
| <b>Dun et al., 2021</b>                  | China                                                                                      | December 2019 - May 2020                 | 12889 | 10337 (80.2) | 1     | Students                        | na              | Online Survey                              | Weight gain                                                          | Single item/ad hoc questionnaire                                                                             |
| <b>Ekpanyaskul &amp; Padungtod, 2021</b> | Thailand                                                                                   | May-June 2020                            | 1011  | 617 (71)     | 9.82  | Working-from-home workers       | na              | Online Survey                              | Dietary changes                                                      | Single item/ad hoc questionnaire                                                                             |
| <b>Elangovan et al., 2020</b>            | India                                                                                      | June-July 2020                           | 1023  | 483 (47.2)   | na    | Workers (from home - at office) | na              | Online Survey                              | Dietary changes                                                      | Single item/ad hoc questionnaire                                                                             |
| <b>Elmacioğlu et al., 2021</b>           | Turkey                                                                                     | April-May 2020                           | 1036  | 827 (80)     | 12.98 | Adults                          | 23.98           | Online Survey                              | Emotional Eating; Weight gain                                        | Three Factor Nutrition Questionnaire (TFEQ-R18)                                                              |
| <b>Enriquez-Martinez et al., 2021</b>    | Brazil (N=2,171), Argentina (N=1,111), Peru (N=1,174), Mexico (N=686), and Spain (N=1,183) | April-September 2020                     | 6325  | 4306 (68)    | na    | Adults                          | na              | Online Survey                              | Dietary changes                                                      | Single item/ad hoc questionnaire                                                                             |
| <b>Flaudias et al., 2020</b>             | France                                                                                     | March 2020                               | 5738  | 4280 (74.6)  | 4.5   | Students                        | 22.6            | Online Survey                              | Eating disorders symptoms                                            | Eating Disorder Inventory (EDI-2); Sick, Control, One, Fat, Food (SCOFF); Ideal Body Stereotype Scale (IBSS) |
| <b>Freitas et al., 2021</b>              | Brazil                                                                                     | T0: March-December 2019; T1: August 2020 | 71    | 71 (100)     | 0.41  | Young Women (students)          | 22.93           | T0: Paper-pencil Survey, T1: Online Survey | Food cravings; Emotional eating; Overeating                          | Brazilian Food Craving Inventory (FCI-Br); Three Factor Eating Questionnaire—R21 (TFEQ-R21)                  |
| <b>Gao et al., 2021</b>                  | China                                                                                      | February 17, 2020 - February 27, 2020    | 912   | 723 (79.3)   | 10.48 | Adults                          | na <sup>9</sup> | Online Survey                              | Emotional Eating                                                     | Adult Eating Behavior Questionnaire (AEBQ)                                                                   |
| <b>Grant et al., 2021</b>                | Italy                                                                                      | April 22, 2020 - May 10, 2020            | 2678  | 1387 (51.8)  | na    | Adults                          | na              | Online Survey                              | Emotional Eating; Snacking; Excessive physical activity; Weight Gain | Single item/ad hoc questionnaire                                                                             |
| <b>Guerrini Usubini et al., 2021</b>     | Italy                                                                                      | December 1, 2020 - January 31, 2021      | 437   | 224 (51.3)   | 5.12  | Young adults                    | 21.9            | Online Survey                              | Emotional Eating                                                     | The Emotional Eating subscale of the Dutch Eating Behavior Questionnaire (EE_DEBQ)                           |

|                                     |        |                                               |       |             |       |        |       |               |                                                                |                                                                                                                         |
|-------------------------------------|--------|-----------------------------------------------|-------|-------------|-------|--------|-------|---------------|----------------------------------------------------------------|-------------------------------------------------------------------------------------------------------------------------|
| <b>Jackson et al., 2022</b>         | USA    | April 21, 2020 - May 06, 2020                 | 360   | 184 (51.1)  | 16.17 | Adults | na    | Online Survey | Snacking                                                       | Single item/ad hoc questionnaire                                                                                        |
| <b>Jackson et al., 2021</b>         | USA    | April 21, 2020 -May 6, 2020                   | 360   | 184 (51.1)  | 16.2  | Adults | 26.26 | Online Survey | Weight Gain                                                    | Intuitive Eating Scale (IES-2)                                                                                          |
| <b>Jordan et al., 2021</b>          | USA    | July–September 2020                           | 140   | 124 (88.6)  | 6.85  | Adults | 29.10 | Online Survey | Concern about weight gain; Disordered eating; Emotional eating | Eating Disorder Examination Questionnaire-Short Form (EDE-QS); 12 items from the Emotional Eating Scale-Revised (EES-R) |
| <b>Karakose et al., 2021</b>        | Turkey | 2020-2021                                     | 266   | 35 (13.2)   | na    | Adults | na    | Online Survey | External eating behavior; Restrained eating behavior           | Fear of COVID-19 Scale; Dutch Eating Behavior Questionnaire” (DEBQ)                                                     |
| <b>Kaufman-Shriqui et al., 2022</b> | Israel | March 30, 2020 -April 25, 2020                | 3797  | 2848 (75)   | na    | Adults | na    | Online Survey | Diet quality                                                   | Single item/ad hoc questionnaire                                                                                        |
| <b>Kesilmi et al., 2021</b>         | Turkey |                                               | 286   | na (na)     | 4.72  | Adults | 71.8  | Online Survey | Uncontrolled Eating; Emotional Eating                          | International Physical Activity Scale (IPAQ); Three-Factor Eating Questionnaire (TFEQ)                                  |
| <b>Khubchanda ni et al., 2020</b>   | USA    | April 2020                                    | 838   | 433 (52)    | 0.39  | Adults | na    | Online Survey | Eating habits                                                  | Single item/ad hoc questionnaire                                                                                        |
| <b>Landaeta-Díaz et al., 2021</b>   | Chile  | April 1, 2020- May 8, 2020                    | 1724  | 1420 (82.3) | 10.3  | Adults | na    | Online Survey | Food consumption; Body weight                                  | Single item/ad hoc questionnaire                                                                                        |
| <b>León-Paucar et al., 2021</b>     | Peru   | June 26, 2020 – July 27, 2020                 | 589   | 292 (49.6)  | 9.4   | Adults | na    | Online Survey | Body Dissatisfaction                                           | Food frequency questionnaire (FFQ); Body Shape Questionnaire (BSQ)                                                      |
| <b>Liboredo et al. 2021</b>         | Brasil | August-September 2020                         | 1368  | 1094 (80)   | na    | Adults | na    | Online Survey | Eating disorder symptoms                                       | Three-Factor Eating Questionnaire (TFEQ-R21)                                                                            |
| <b>Li et al., 2021</b>              | China  | September 2019, February 2020, and April 2020 | 634   | 443 (70)    | 1.56  | Adults | na    | Online Survey | Disinhibited eating                                            | Eating Questionnaire-R18 (TFEQ-R18)                                                                                     |
| <b>Lofrano-Prado et al., 2021</b>   | Brazil | May 5, 2020 - May 17, 2020                    | 1854  | 1085 (58.5) | 13.1  | Adults | 25.7  | Online Survey | BMI; Physical activity                                         | Single item/ad hoc questionnaire                                                                                        |
| <b>Ma et al., 2021</b>              | China  | April 25, 2020 - May 11, 2020                 | 10545 | 5940 (56.3) | 9.9   | Adults | na    | Online Survey | Weight Changes                                                 | Single item/ad hoc questionnaire                                                                                        |
| <b>Madah et al., 2021</b>           | Turkey | August-September 2020.                        | 1626  | 1131 (69.6) | 11    | Adults | 24.4  | Online Survey | Emotional Eating                                               | Emotional Eating Scale                                                                                                  |
| <b>Madan et al., 2021</b>           | India  |                                               | 1000  | 500 (50)    | na    | Adults | na    | Online Survey | Weight Changes                                                 | Single item/ad hoc questionnaire                                                                                        |
| <b>Maffoni et al., 2021</b>         | Italy  | April 30, 2020- May 10, 2020                  | 1304  | 973 (75)    | na    | Adults | 23.2  | Online Survey | Craving or eating between meals                                | Single item/ad hoc questionnaire                                                                                        |

|                                         |                |                                                                          |       |              |       |                          |       |                            |                                                                                                             |                                                                                                                                                |
|-----------------------------------------|----------------|--------------------------------------------------------------------------|-------|--------------|-------|--------------------------|-------|----------------------------|-------------------------------------------------------------------------------------------------------------|------------------------------------------------------------------------------------------------------------------------------------------------|
| <b>Mahar et al., 2021</b>               | Pakistan       | April-May 2020                                                           | 313   | na (na)      | na    | Adults                   | na    | Online Survey              | Eating disorders; Binge eating                                                                              | SCOFF questionnaire; BEDS-7                                                                                                                    |
| <b>Malkawi et al., 2021</b>             | Jordan         | March-April 2020                                                         | 2103  | 2103 (100)   | 6.4   | Adults                   | na    | Online Survey              | Weight Changes                                                                                              | Single item/ad hoc questionnaire                                                                                                               |
| <b>Martínez-de-Quel et al., 2021</b>    | Spain          | March 16 and March 31, 2020 - April 30 and May 11, 2020                  | 161   | 60 (37)      | 11.2  | Adults                   | 23.7  | Online Survey              | Eating disorders                                                                                            | Eating Attitude Test-26 (EAT-26)                                                                                                               |
| <b>Mason et al. 2021</b>                | California     | October 24, 2018 and October 31, 2019 and May 18, 2020 and July 21, 2020 | 1820  | 1119 (61)    | .46   | Adults                   | na    | Online Survey              | Overeating; Snacking                                                                                        | Single item/ad hoc questionnaire                                                                                                               |
| <b>Mazzolani et al., 2021</b>           | Brazil         | June - September 2020                                                    | 1183  | 1183 (100)   | 0.71  | Women                    | 24.79 | Online Survey              | Snacking; Feeling fat, Body shape concern, Body dissatisfaction, Body misperception; Bingeing, Binge Eating | Brazilian-Portuguese version of The Eating Motivation Survey (TEMS); Binge Eating Scale (BES); Disordered Eating Attitude Scale- Short Version |
| <b>McAtamney et al., 2021</b>           | United Kingdom | Mid July 2020                                                            | 136   | 88 (64.7)    | 11.88 | Adults                   | 26.21 | Online Survey              | Emotional eating                                                                                            | Emotional Eating Scale (EES); Salzburg Emotional Eating Scale (SEES)                                                                           |
| <b>Micheletti Cremasco et al., 2021</b> | Italy          | May 14, 2020 – May 31, 2020                                              | 3666  | 2676 (73)    | 12    | Adults                   | 22.3  | Online Survey              | Weight changes                                                                                              | Single item/ad hoc questionnaire                                                                                                               |
| <b>Molina-Montes et al., 2021</b>       | Spain          | March 20, 2020 - May 5, 2020                                             | 36185 | 28064 (77.6) | na    | Adults                   | na    | Online Survey              | Snacking                                                                                                    | Mediterranean Diet Adherence Screener (MEDAS)                                                                                                  |
| <b>Mota et al., 2021</b>                | Brazil         | May - July 2020                                                          | 710   | 574 (80.8)   | na    | Healthcare Professionals | na    | Online Survey              | Bingeing, Binge Eating; Night eating, Night feeding                                                         | Single item/ad hoc questionnaire                                                                                                               |
| <b>Mulugeta et al., 2021</b>            | Massachusetts  | March 01, 2020 - May 31, 2020                                            | 11534 | 7681 (66.6)  | na    | Adults                   | na    | Electronic Medical Records | Weight changes                                                                                              | Medical records                                                                                                                                |
| <b>Mumena, 2020</b>                     | Saudi Arabia   | April 13 and 22, 2020                                                    | 879   | 576 (65.5)   | 12.1  | Adults                   | na    | Online Survey              | Changes in eating habits                                                                                    | Single item/ad hoc questionnaire                                                                                                               |
| <b>Nitu et al., 2021</b>                | Romania        | January-March 2021                                                       | 620   | 501 (80.8)   | 9.42  | Adults                   | 22.93 | Online Survey              | Weight fluctuations; Meal frequency                                                                         | Single item/ad hoc questionnaire                                                                                                               |
| <b>Özcan &amp; Yeşilkaya, 2021</b>      | Turkey         | na                                                                       | 578   | 422 (73)     | na    | Adults                   | 24.12 | Online Survey              | Emotional eating                                                                                            | Turkish version of Emotional Eater Questionnaire (EEQ-TR)                                                                                      |
| <b>Özden &amp; Parlar Kiliç, 2021</b>   | Turkey         | May 15 and 29, 2020                                                      | 1011  | 607 (60)     | 3.11  | Adults                   | na    | Online Survey              | Weight change; Addictive eating behavior                                                                    | Nutrition Exercise Behavior Scale                                                                                                              |

|                                 |                      |                                    |      |             |       |                   |       |               |                                                |                                                                                                                                                                    |
|---------------------------------|----------------------|------------------------------------|------|-------------|-------|-------------------|-------|---------------|------------------------------------------------|--------------------------------------------------------------------------------------------------------------------------------------------------------------------|
| <b>Özen et al., 2021</b>        | Turkey.              | April-May 2020                     | 334  | 162 (48.5)  | 3.7   | Adults            | 22.3  | na            | Emotional Eating                               | The Emotional Eating Scale (EES)                                                                                                                                   |
| <b>O'zenoglu et al., 2021</b>   | Turkey.              | April 2020                         | 432  | 312 (72.2)  | 12.14 | Adults            | na    | na            | Attitude of Healthy Eating levels              | Healthy Nutrition Attitude Scale (ASHN)                                                                                                                            |
| <b>Pak et al., 2022</b>         | Turkey.              | April 15, 2020 - May 15, 2020      | 362  | 242 (66.9)  | 8.22  | Adults            | na    | Online Survey | Emotional Eating                               | Eating Questionnaire-R21 (TFEQ-R21)                                                                                                                                |
| <b>Palmer et al., 2021</b>      | Germany              | March 12, 2020 - May 3, 2020       | 827  | 622 (75.2)  | na    | Adults            | na    | Online Survey | Weight change                                  | Single item/ad hoc questionnaire                                                                                                                                   |
| <b>Pappa et al., 2021</b>       | West London          | June-July 2020                     | 387  | 275 (71.1)  | na    | Adults            | na    | Online Survey | Overeating                                     | Single item/ad hoc questionnaire                                                                                                                                   |
| <b>Pertuz-Cruz et al., 2021</b> | Spain                | April 6, 2020 - May 22, 2020       | 2745 | 2006 (73.1) | na    | Adults            | na    | Online Survey | Snacking; Overeating; Weight gain              | Single item/ad hoc questionnaire                                                                                                                                   |
| <b>Phillipou et al., 2020</b>   | Australia            | April 20                           | 5289 | 4231 (80)   | 13.67 | Adults            | na    | Online Survey | Food restricting; Binge eating                 | Eating Disorders Examination Questionnaire (EDE-Q).                                                                                                                |
| <b>Phillipou et al., 2021</b>   | Australia            | April-September 2020               | 4684 | na (na)     | 14.17 | Adults            | na    | Online Survey | Changes in eating habits                       | Eating Disorders Examination Questionnaire (EDE-Q).                                                                                                                |
| <b>Pirutinsky et al., 2021</b>  | New Yourk            | March 30, 2020 - May 14, 2020      | 731  | 482 (66)    | 16.79 | Adults            | na    | Online Survey | Weight Change                                  | Single item/ad hoc questionnaire                                                                                                                                   |
| <b>Pisot et al., 2020</b>       | Slovenia             | April 15, 2020 - May 3, 2020       | 4108 | 2567 (62.5) | 13.2  | Adults            | na    | Online Survey | Snacking; Weight gain                          | Single item/ad hoc questionnaire                                                                                                                                   |
| <b>Poelman et al., 2021</b>     | Netherlands          | April 22, 2020–April 28, 2020      | 1030 | 520 (50.5)  | 17.0  | Adults            | 26.2  | Online Survey | Changes in eating habits                       | Single item/ad hoc questionnaire                                                                                                                                   |
| <b>Pompili et al., 2022</b>     | Italy                | April-May, 2020                    | 447  | 280 (63)    | 1.93  | Adults            | 22.65 | Online Survey | Food disturbance; Compensatory behaviors       | Single item/ad hoc questionnaire                                                                                                                                   |
| <b>Pop et al., 2021</b>         | Romania              | 2018-2020                          | 88   | 0 (0)       | 0.67  | Adults            | 24.2  | na            | Weight gain                                    | Single item/ad hoc questionnaire                                                                                                                                   |
| <b>Prezotti et al., 2021</b>    | Brazil               | June 11, 2020 - June 19, 2020      | 275  | 26 (9.5)    | 2.74  | Urology residents | na    | Online Survey | Weight Gain; Weight loss                       | Single item/ad hoc questionnaire                                                                                                                                   |
| <b>Puhl et al., 2020</b>        | USA                  | T0: 2018<br>T1: Aprile - July 2020 | 584  | 375 (64.2)  | 2     | Young Adults      | 28.2  | Online Survey | Bingeing, Binge Eating; Emotional eating       | five-item coping subscale of the Motivations to Eat Scale; two questions adapted from the adult version of the Questionnaire on Eating and Weight Patterns-Revised |
| <b>Queiroz et al., 2021</b>     | Brazil               | April 30, 2021 - May 31, 2021      | 302  | 232 (76.8)  | na    | Adults            | na    | Online Survey | Weight gain; Weight loss                       | ecSI2.0™BR questionnaire                                                                                                                                           |
| <b>Radwan et al., 2021</b>      | United Arab Emirates | May 5, 2020 - May 18, 2020         | 2060 | 1548 (75.1) | 10.05 | Adults            | 27.33 | Online Survey | Weight Gain; Weight loss; Snacking; Overeating | Single item/ad hoc questionnaire                                                                                                                                   |

|                                     |                                                                                                               |                                                            |      |             |       |        |       |                             |                                                                                                                                                                                                                                             |                                                                                                                                |
|-------------------------------------|---------------------------------------------------------------------------------------------------------------|------------------------------------------------------------|------|-------------|-------|--------|-------|-----------------------------|---------------------------------------------------------------------------------------------------------------------------------------------------------------------------------------------------------------------------------------------|--------------------------------------------------------------------------------------------------------------------------------|
| <b>Ramalho et al., 2022</b>         | Portugal                                                                                                      | May 11, 2020 - May 25, 2020                                | 254  | 210 (82.7)  | 11.82 | Adults | 24.08 | Online Survey               | Overweight, Weight Gain; Weight loss; Bingeing, Binge Eating; Emotional eating; Feeling fat, Body shape concern, Body dissatisfaction, Body misperception; Overeating; Feeding/food restriction, Undereating, Food avoidance, Appetite Loss | Three-factor eating questionnaire (TFEQ-R21)                                                                                   |
| <b>Reyes-Olavarria et al., 2020</b> | Chile                                                                                                         | May-June 2020                                              | 700  | 528 (75.4)  | na    | Adults | na    | Online Survey               | Overweight, Weight Gain; Overeating; Undereating                                                                                                                                                                                            | Single item/ad hoc questionnaire                                                                                               |
| <b>Robertson et al., 2021</b>       | UK                                                                                                            | May 11, 2020 - June 26, 2020                               | 264  | 206 (78)    | 14.16 | Adults | na    | Online Survey               | Body shape concern; Excessive physical activity, excessive exercise, compulsive exercise                                                                                                                                                    | Single item/ad hoc questionnaire                                                                                               |
| <b>Robinson et al., 2021</b>        | UK                                                                                                            | April 28, 2020 - May 2, 2020                               | 2002 | 1236 (61.7) | 12.3  | Adults | 27.8  | Online Survey               | Weight changes;,Physical Activity, Diet quality; Binge eating                                                                                                                                                                               | IPAQ; SFFQ; ALEBS                                                                                                              |
| <b>Robinson et al., 2020</b>        | UK                                                                                                            | April 19-22, 2020                                          | 723  | 488 (67)    | 9.6   | Adults | na    | Online Survey               | Bingeing; Physical activity                                                                                                                                                                                                                 | IPAQ; SFFQ; ALEBS                                                                                                              |
| <b>Rodriguez-Perez et al., 2020</b> | Spain                                                                                                         | March 20, 2020 -Mid April 2020                             | 7514 | 5305 (70.6) | na    | Adults | na    | Online Survey               | Changes in dietary habits                                                                                                                                                                                                                   | Single item/ad hoc questionnaire                                                                                               |
| <b>Rogers et al., 2021</b>          | USA                                                                                                           | T0: March 30, 2020 - April 7, 2020 T1: November 2-21, 2020 | 619  | 342 (55)    | na    | Adults | na    | Online Survey               | Changes in dietary habits; Changes in exercise habits; Risk for food insecurity                                                                                                                                                             | Diet Behavior and Nutrition questionnaire of the National Health and Nutrition Examination Survey (NHANES); PROMIS-29 (PROPr); |
| <b>Ruiz-Zaldibar et al., 2022</b>   | Spain                                                                                                         | May 28, 2020 – June 21, 2020                               | 675  | 472 (69.9)  | 12.9  | Adults | 24.2  | Online Survey               | Emotional eating                                                                                                                                                                                                                            | Emotional eater questionnaire (EEQ)                                                                                            |
| <b>Ruiz et al., 2021</b>            | Cross-cultural: United Kingdom, South Korea, Finland, Philippines, Latin America, Spain, North America, Italy | May-August 2020                                            | 1131 | 745 (65)    | 12.88 | Adults | na    | Online Survey               | Changes in eating habits; Weight change                                                                                                                                                                                                     | Single item/ad hoc questionnaire                                                                                               |
| <b>Sadler et al., 2021</b>          | USA                                                                                                           | May-June 2020                                              | 428  | 270 (63.1)  | 8.25  | Adults | 27.9  | Online Survey               | Food intake                                                                                                                                                                                                                                 | Emotional overeating subscale from the Adult Eating Behavior Questionnaire                                                     |
| <b>Sánchez et al., 2021</b>         | Spain                                                                                                         | May 26, 2020-June 10, 2020                                 | 1000 | 515 (51.5)  | 18    | Adults | 25.3  | Computer-assisted telephone | Weight change                                                                                                                                                                                                                               | CATI                                                                                                                           |

|                                        |                                                               |                                      |      |             |       |                               |       | interviews<br>(CATI) |                                                                                                        |                                                                                   |
|----------------------------------------|---------------------------------------------------------------|--------------------------------------|------|-------------|-------|-------------------------------|-------|----------------------|--------------------------------------------------------------------------------------------------------|-----------------------------------------------------------------------------------|
| <b>Sánchez-Sánchez et al., 2020</b>    | Spain                                                         | May 2020                             | 1065 | 775 (72.8)  | 12.4  | Young Adults                  | na    | Online Survey        | Physical activity; Weight change                                                                       | Single item/ad hoc questionnaire                                                  |
| <b>Sánchez-Sánchez et al., 2021</b>    | Spain                                                         | January 10, 2021 - February 10, 2021 | 637  | 477 (74.9)  | na    | Adults                        | na    | Online Survey        | Increase in food consumption                                                                           | Single item/ad hoc questionnaire                                                  |
| <b>Santana et al., 2021</b>            | Brazil                                                        | April-May 2020                       | 955  | 735 (77)    | 8.07  | Students                      | na    | Online Survey        | Changes in dietary habits                                                                              | Food Frequency Questionnaire                                                      |
| <b>Sarda et al., 2022</b>              | France                                                        | June 2020                            | 2422 | 1269 (52.4) | na    | Adults                        | na    | Online Survey        | Changes in cooking habits                                                                              | Single item/ad hoc questionnaire                                                  |
| <b>Saxena et al., 2021</b>             | India                                                         | June-July 2020                       | 60   | 30 (50)     | 1.35  | Students                      | 23.06 | Online Survey        | Food intake                                                                                            | Single item/ad hoc questionnaire                                                  |
| <b>Scacchi et al., 2021</b>            | Italy                                                         | May 2020                             | 1865 | 1304 (69.9) | 16    | Adults                        | na    | Online Survey        | Changes in food choice and intake                                                                      | Emotional Overeating Questionnaire-5 (EOQ-5)                                      |
| <b>Scarmozzino &amp; Visioli, 2020</b> | Italy                                                         | April 2020                           | 1929 | 1319 (67)   | na    | Adults                        | na    | Online Survey        | Changes in dietary habits                                                                              | Single item/ad hoc questionnaire                                                  |
| <b>Scharmer et al., 2020</b>           | USA                                                           | March-April 2020                     | 295  | 192 (65.1)  | 2.0   | Students                      | na    | Online Survey        | Eating disorder symptoms                                                                               | Eating Disorder Examination-Questionnaire (EDE-Q); Compulsive exercise test (CET) |
| <b>Schulte et al., 2022</b>            | USA                                                           | February 2021                        | 243  | na (na)     | 13.19 | Adults                        | 25.85 | Online Survey        | Changes in weight and eating behaviours                                                                | Modified Yale Food Addiction Scale 2.0 (mYFAS2.0)                                 |
| <b>Seal et al., 2022</b>               | USA                                                           | T0: March 2020, T1: August 2020      | 1516 | 1193 (78.8) | 17.6  | Adults                        | 27.1  | Online Survey        | Overweight, Weight Gain                                                                                | Single item/ad hoc questionnaire                                                  |
| <b>Sebastião et al., 2022</b>          | USA & Brazil                                                  | September-October 2020               | 277  | 186 (67.1)  | 13.6  | Adults                        | 27.1  | Online Survey        | Weight Gain                                                                                            | Single item/ad hoc questionnaire                                                  |
| <b>Serin et al., 2020</b>              | Turkey                                                        | na                                   | 1064 | 624 (58.6)  | na    | Students                      | na    | Online Survey        | Feeding/food restriction, Undereating, Food avoidance, Appetite Loss; Emotional eating                 | Dutch Eating Behaviour Questionnaire (DEBQ)                                       |
| <b>Shaun et al., 2021</b>              | Bangladesh                                                    | February 3-13, 2021                  | 394  | 175 (44.42) | na    | Students                      | na    | Online Survey        | Weight Gain; Undereating; Excessive physical activity; Snacking                                        | International Physical Activity Questionnaire Short Form (IPAQ-SF)                |
| <b>Shibata et al., 2021</b>            | Brazil, Italy, Spain, Lithuania, Portugal, UK, Japan, Hungary | April - June 2020                    | 2295 | 1607 (70)   | 11.40 | Adults                        | na    | Online Survey        | Feeling fat, Body shape concern, Body dissatisfaction, Body misperception; Excessive physical activity | Appearance Anxiety Inventory; Excessive Addiction Inventory (EAI)                 |
| <b>Shin, 2021</b>                      | USA                                                           | na                                   | 515  | 306 (59.4)  | 12.5  | Overweight and Obese (BMI>25) | 31.2  | Online Survey        | Weight Gain                                                                                            | Single item/ad hoc questionnaire                                                  |

|                                   |                                        |                                       |      |             |       |                                      |       |                  |                                                                                                             |                                                                                                                                                                                             |
|-----------------------------------|----------------------------------------|---------------------------------------|------|-------------|-------|--------------------------------------|-------|------------------|-------------------------------------------------------------------------------------------------------------|---------------------------------------------------------------------------------------------------------------------------------------------------------------------------------------------|
| <b>Sidor et al., 2020</b>         | Poland                                 | April 2020                            | 1097 | 1043 (95.1) | 9     | Adults, non working on regular basis | 23.5  | Online Survey    | Weight Gain; Weight loss; Overeating; Snacking                                                              | Single item/ad hoc questionnaire                                                                                                                                                            |
| <b>Silva et al., 2021</b>         | Portugal                               | April 2020                            | 5856 | 2495 (42.6) | na    | Adults                               | na    | Telephone Survey | Weight Gain; Snacking                                                                                       | Single item/ad hoc questionnaire                                                                                                                                                            |
| <b>Silverman &amp; Wang, 2021</b> | US                                     | June-July 2020                        | 129  | 116 (90)    | na    | School teachers                      | na    | Online Survey    | Weight gain                                                                                                 | Dutch Eating Behavioral Questionnaire; Food Frequency Questionnaire short-form                                                                                                              |
| <b>Skotnicka et al., 2021</b>     | Poland, Austria and the United Kingdom | October 1-30, 2020                    | 1831 | 604 (56.4)  | na    | Adults                               | na    | Online Survey    | Weight change                                                                                               | Single item/ad hoc questionnaire                                                                                                                                                            |
| <b>Smith et al., 2021</b>         | USA                                    | May - June 2020                       | 429  | 272 (63.4)  | na    | Adults                               | na    | Online Survey    | Physical Activity                                                                                           | Single item/ad hoc questionnaire                                                                                                                                                            |
| <b>Sobba et al., 2021</b>         | USA                                    | August 26, 2020 - October 21, 2020    | 589  | 435 (73.9)  | na    | Adults                               | 27.36 | Online Survey    | Snacking; Physical Activity; Weight change                                                                  | Single item/ad hoc questionnaire                                                                                                                                                            |
| <b>Solè et al., 2021</b>          | Spain                                  | May 14, 2020 - June 8, 2020           | 413  | 306 (75.7)  | 14.04 | Adults (community controls)          | na    | Online Survey    | Weight Gain; Weight loss                                                                                    | Single item/ad hoc questionnaire                                                                                                                                                            |
| <b>Suka et al., 2021</b>          | Japan                                  | November 2020                         | 8000 | na (na)     | na    | Adults                               | na    | Online Survey    | Excessive physical activity; Weight Gain; Weight Loss; Night eating                                         | National Health and Nutrition Survey                                                                                                                                                        |
| <b>Sulejmani et al., 2021</b>     | Kosovo                                 | May- June 2020                        | 689  | 488 (71)    | na    | Adults                               | na    | Online Survey    | Weight Gain; Snacking; Overeating                                                                           | Single item/ad hoc questionnaire                                                                                                                                                            |
| <b>Swami et al., 2021</b>         | UK                                     | May 21, 2020                          | 506  | 255 (50.4)  | 11.36 | Adults                               | 26.35 | Online Survey    | Feeling fat, Body shape concern, Body dissatisfaction, Body misperception                                   | Women: Body Dissatisfaction Subscale (EDI-3-BD) and Drive for Thinness subscale (EDI-3-DT) of EDI-3; Men: Low Body Fat subscale and Muscularity subscale of Male Body Attitude Scale (MBAS) |
| <b>Tabler et al., 2021</b>        | USA (Oklahoma, Wyoming, Texas)         | October 2020 - January 2021           | 411  | 304 (74)    | 11.4  | Adults                               | 26.7  | Online Survey    | Weight Gain; Weight loss; Eating disorder symptoms                                                          | Eating Disorder Examination—Questionnaire Short (EDE-QS)                                                                                                                                    |
| <b>Tan et al., 2021</b>           | Malaysia                               | June 4-11, 2021-                      | 1013 | 652 (64.4)  | 2.46  | Young Adults                         | 22.78 | Online Survey    | Overweight, Weight Gain; Weight loss                                                                        | Food Choice Questionnaire (FCQ)                                                                                                                                                             |
| <b>Tffifha et al., 2021</b>       | Tunisia                                | April 19, 2020 - May 5, 2020          | 180  | 126 (70.2)  | na    | Young doctors                        | na    | Online Survey    | Bingeing, Binge Eating                                                                                      | Single item/ad hoc questionnaire                                                                                                                                                            |
| <b>Thahir et al., 2021</b>        | Indonesia                              | April 4, 2020 - April 18, 2020        | 1044 | 862 (82.6)  | 2.42  | Students                             | 21.94 | Online Survey    | Overweight, Weight Gain                                                                                     | Single item/ad hoc questionnaire                                                                                                                                                            |
| <b>Trott et al., 2021</b>         | UK                                     | T0: April 08, 2019 - 31 July 2019 T1: | 319  | 268 (84)    | 11.75 | Adults (health club users)           | 24.02 | Online Survey    | Excessive physical activity, excessive exercise, compulsive exercise; Feeling fat, Body shape concern, Body | Exercise Addiction Inventory (EAI) - Eating Attitudes Test 26 (EAT-26) - Body                                                                                                               |

|                                            |                                                                                                                                                                                                                     | August 26,<br>2020 -<br>Septembe<br>r 11, 2020 |       |              |      |                   |       |                  | dissatisfaction, Body<br>misperception                    | Dysmorphic Disorder<br>Questionnaire (BDDQ)     |
|--------------------------------------------|---------------------------------------------------------------------------------------------------------------------------------------------------------------------------------------------------------------------|------------------------------------------------|-------|--------------|------|-------------------|-------|------------------|-----------------------------------------------------------|-------------------------------------------------|
| <b>Turgut et al.,<br/>2020</b>             | Turkey                                                                                                                                                                                                              | na                                             | 278   | 111 (39.93)  | 5.74 | Athletes          | 22.52 | na               | Night eating, Night feeding                               | Night Eating Questionnaire<br>(NE)              |
| <b>Urzeala et<br/>al., 2022</b>            | France,<br>Australia,<br>Austria,<br>Canada,<br>Chile, China,<br>Denmark,<br>Indonesia,<br>Italy, Iran,<br>Norway,<br>Portugal,<br>Tunisia,<br>Taiwan,<br>Scotland,<br>Switzerland,<br>Romania and<br>United States | March -<br>June 2020                           | 10121 | 5603 (55.36) | na   | Adults            | 24.78 | Online<br>Survey | Weight Gain                                               | COVISTRESS Questionnaire                        |
| <b>Vacca et al.,<br/>2021</b>              | Italy - Spain                                                                                                                                                                                                       | April 2020                                     | 817   | 536 (65.61)  | na   | Adults            | na    | Online<br>Survey | Emotional eating; Overeating;<br>Food restriction         | Three-factor eating<br>questionnaire (TFEQ)-R21 |
| <b>Valencia et<br/>al., 2021</b>           | Arizona                                                                                                                                                                                                             | na                                             | 155   | na           | na   | Adults            | na    | na               | Overeating                                                | Single item/ad hoc<br>questionnaire             |
| <b>Vidal et al.,<br/>2021</b>              | Uruguay                                                                                                                                                                                                             | May 2020                                       | 891   | 659 (74)     | na   | Adults            | na    | Online<br>Survey | Snacking                                                  | Single item/ad hoc<br>questionnaire             |
| <b>Visser et al.,<br/>2020</b>             | The<br>Netherlands                                                                                                                                                                                                  | June-<br>October<br>2020                       | 1119  | 591 (52.8)   | 7    | Elders            | na    | Online<br>Survey | Weight Gain, Increased<br>Physical activity, Snacking     | Single item/ad hoc<br>questionnaire             |
| <b>Wang et al.,<br/>2022</b>               | US                                                                                                                                                                                                                  | May-June<br>2020                               | 197   | 197 (100)    | 6.87 | Mothers           | 28.34 | Online<br>Survey | Emotional Eating                                          | TFEQ-R18, FPSQ                                  |
| <b>Yang et al.,<br/>2020</b>               | China                                                                                                                                                                                                               | May 2020                                       | 10082 | 7230 (71.7)  | 2.3  | Adults            | 21.8  | Online<br>Survey | Weight Gain                                               | Single item/ad hoc<br>questionnaire             |
| <b>Yilmaz<br/>Akyüz et al.,<br/>2021</b>   | Turkey                                                                                                                                                                                                              | April - May<br>2020                            | 2019  | 1589 (78.2)  | na   | Adults            | na    | Online<br>Survey | Emotional Eating; Overweight,<br>Weight Gain; Weight Loss | Three-Factor Eating Scale<br>(TFEQTr21)         |
| <b>Yilmaz &amp;<br/>Sanlier, 2021</b>      | Turkey                                                                                                                                                                                                              | April-May<br>2020                              | 529   | 529 (100)    | 8    | Women             | na    | Online<br>Survey | Night eating                                              | Night Eating Syndrome<br>Questionnaire          |
| <b>Yokoro &amp;<br/>Wakimoto,<br/>2021</b> | Japan                                                                                                                                                                                                               | May 2020                                       | 164   | 164 (100)    | 0.7  | Students          | 20.8  | Online<br>Survey | Weight change; Snacking                                   | Single item/ad hoc<br>questionnaire             |
| <b>Zach &amp;<br/>Fernandez,<br/>2021</b>  | Israeli                                                                                                                                                                                                             | April 2020                                     | 1855  | 1289 (69.49) | 14.5 | Adults            | 25.46 | Online<br>Survey | Weight change                                             | Single item/ad hoc<br>questionnaire             |
| <b>Zachary et<br/>al., 2020</b>            | USA                                                                                                                                                                                                                 | 2020                                           | 173   | 96 (55.49)   | 12.5 | Adults            | 27.0  | Online<br>Survey | Weight gain                                               | Single item/ad hoc<br>questionnaire             |
| <b>Zhang &amp;<br/>Zhang, 2020</b>         | China                                                                                                                                                                                                               | April-May<br>2020                              | 640   | 100 (100)    | 4.5  | Pregnant<br>Women | na    | Online<br>Survey | Emotional eating                                          | Dutch Eating Behavior<br>Questionnaire          |



|                                       |        |                   |      |            |       |                                        |       |               |                                            |                                    |
|---------------------------------------|--------|-------------------|------|------------|-------|----------------------------------------|-------|---------------|--------------------------------------------|------------------------------------|
| <b>Zhou &amp; Wade, 2021</b>          | USA    | September 2021    | 100  | 100 (100)  | 2.01  | Students at risk for disordered eating | 25.52 | Online Survey | Eating Disorder                            | EDE-Q                              |
| <b>Zhu et al., 2021</b>               | China  | March-April 2020  | 889  | 542 (61)   | 11.4  | Adults                                 | na    | Online Survey | Snacking; Physical Activity; Weight change | Single item/ad hoc questionnaire   |
| <b>Zielinska &amp; Luszczki, 2021</b> | Poland | January-June 2021 | 1022 | 958 (93.7) | 11.86 | Adults                                 | 25.20 | Online Survey | Weight gain; Weight loss; Food addiction   | Yale Food Addiction Scale (YFAS-2) |

*Note: na: not applicable*

# Supplementary Table S4

Meta-regression of factor affecting prevalence of Weight Gain

| Weight Gain                           | EST.    | SE     | 95% CI        | p     |
|---------------------------------------|---------|--------|---------------|-------|
| <b>Risk of bias</b>                   |         |        |               |       |
| High risk (ref) (k=8)                 |         |        |               |       |
| Medium risk (k=31)                    | 0.0004  | 0.026  | -0.051; 0.052 | 0.988 |
| Low risk (k=45)                       | -0.067  | 0.043  | -0.151; 0.018 | 0.122 |
| <b>Recruitment time</b>               |         |        |               |       |
| First wave (ref) (k=66)               |         |        |               |       |
| Second wave (k=8)                     | -0.012  | 0.044  | -0.097; 0.074 | 0.787 |
| Third wave (k=8)                      | -0.014  | 0.043  | -0.098; 0.071 | 0.750 |
| <b>Country</b>                        |         |        |               |       |
| Asia (ref) (k=35)                     |         |        |               |       |
| Africa (k=3)                          | 0.082   | 0.066  | -0.047; 0.211 | 0.214 |
| Europa (k=28)                         | -0.048  | 0.028  | -0.102; 0.006 | 0.082 |
| South America (k=11)                  | 0.057   | 0.038  | -0.017; 0.131 | 0.133 |
| North America (k=7)                   | 0.032   | 0.046  | -0.058; 0.122 | 0.491 |
| <b>Type of sample</b>                 |         |        |               |       |
| General adult population (ref) (k=69) |         |        |               |       |
| Women (k=3)                           | -0.007  | 0.069  | -0.142; 0.128 | 0.920 |
| Athletes (k=8)                        | 0.106   | 0.119  | -0.126; 0.338 | 0.371 |
| Older adults (k<3)                    | na      | na     | na            | na    |
| Overweight & Obese (k<3)              | na      | na     | na            | na    |
| Students (k=8)                        | 0.004   | 0.044  | -0.082; 0.090 | 0.927 |
| <b>% Female</b> (k=79)                | 0.0002  | 0.0007 | -0.001; 0.002 | 0.715 |
| <b>Age</b> (k=53)                     | -0.0008 | 0.001  | -0.003; 0.002 | 0.474 |
| <b>BMI</b> (k=38)                     | 0.003   | 0.007  | -0.012; 0.017 | 0.704 |
| <b>Outcome assessment</b>             |         |        |               |       |
| Single item (ref) (k=52)              |         |        |               |       |
| Standardized questionnaire (k=31)     | -0.025  | 0.026  | -0.075; 0.026 | 0.338 |

**Note:** na: not applicable, SE: standard error, 95% CI: 95% confidence interval; ref: reference category; the reference category was defined as the most numerous category; significant predictors in bold.

## Supplementary Table S5

*Metaregression of factor affecting prevalence of Food restriction*

| Food restriction                      | EST.   | S.E.  | 95% CI of Est. | P value      |
|---------------------------------------|--------|-------|----------------|--------------|
| <b><i>Risk of bias</i></b>            |        |       |                |              |
| High risk (ref) (k<3)                 |        |       |                |              |
| Medium risk (k<3)                     | na     | na    | na             | na           |
| Low risk (k=9)                        | 0.225  | 0.188 | -0.143; 0.594  | 0.231        |
| <b><i>Recruitment time</i></b>        |        |       |                |              |
| First wave (ref) (k=12)               |        |       |                |              |
| Second wave (k<3)                     | na     | na    | na             | na           |
| <b><i>Country</i></b>                 |        |       |                |              |
| Asia (ref) (k=5)                      |        |       |                |              |
| Europa (k<3)                          | na     | na    | na             | na           |
| South America (k<3)                   | na     | na    | na             | na           |
| North America (k=5)                   | 0.120  | 0.163 | -0.200; 0.439  | 0.463        |
| <b><i>Type of sample</i></b>          |        |       |                |              |
| General adult population (ref) (k=12) |        |       |                |              |
| Students (k<3)                        | na     | na    | na             | na           |
| <b>% Female</b> (k=13)                | 0.014  | 0.004 | 0.005; 0.022   | <b>0.001</b> |
| <b>Age</b> (k=9)                      | -0.007 | 0.016 | -0.039; 0.025  | 0.682        |
| <b>BMI</b> (k=6)                      | 0.017  | 0.071 | -0.123; 0.156  | 0.815        |
| <b><i>Outcome assessment</i></b>      |        |       |                |              |
| Single item (ref) (k=7)               |        |       |                |              |
| Standardized questionnaire (k=6)      | 0.128  | 0.130 | -0.127; 0.382  | 0.325        |

**Note:** na: not applicable, SE: standard error, 95% CI: 95% confidence interval; ref: reference category; the reference category was defined as the most numerous category; significant predictors in bold.

## Supplementary Table S6

*Metaregression of factor affecting prevalence of Body shape concerns*

| Body shape concerns                  | EST.   | S.E.  | 95% CI of Est. | P value      |
|--------------------------------------|--------|-------|----------------|--------------|
| <b><i>Risk of bias</i></b>           |        |       |                |              |
| High risk (ref) (k= 4)               |        |       |                |              |
| Medium risk (k= 3)                   | 0.097  | 0.175 | -0.246; 0.439  | 0.580        |
| Low risk (k=<<3)                     | na     | na    | na             | na           |
| <b><i>Recruitment time</i></b>       |        |       |                |              |
| First wave (ref) (k=6)               |        |       |                |              |
| Second wave (k=<<3)                  | na     | na    | na             | na           |
| <b><i>Country</i></b>                |        |       |                |              |
| Australia (ref) (k=<<3)              |        |       |                |              |
| Asia (k=<<3)                         | na     | na    | na             | na           |
| Europa (k=<<3)                       | na     | na    | na             | na           |
| South America (k=<<3)                | na     | na    | na             | na           |
| North America (k= 3)                 | 0.240  | 0.300 | -0.834; 0.792  | 0.496        |
| <b><i>Type of sample</i></b>         |        |       |                |              |
| General adult population (ref) (k=6) |        |       |                |              |
| Women (k=>3)                         | na     | na    | na             | na           |
| Athletes (k=>3)                      | na     | na    | na             | na           |
| <b>% Female</b> (k=8)                | -0.003 | .004  | -0.011; 0.006  | 0.515        |
| <b>Age</b> (k=7)                     | 0.009  | 0.008 | -0.008; 0.025  | 0.305        |
| <b>BMI</b> (k=3)                     | -0.035 | 0.057 | -0.146; 0.076  | 0.537        |
| <b><i>Outcome assessment</i></b>     |        |       |                |              |
| Single item (ref) (k=3)              |        |       |                |              |
| Standardized questionnaire (k=5)     | -0.244 | 0.122 | -0.483; -0.006 | <b>0.044</b> |

**Note:** na: not applicable, SE: standard error, 95% CI: 95% confidence interval; ref: reference category; the reference category was defined as the most numerous category; significant predictors in bold.

## Supplementary Table S7

*Metaregression of factor affecting prevalence of Weight loss*

| <b>Weight loss</b>                    | <b>EST.</b> | <b>S.E.</b> | <b>95% CI of Est.</b> | <b>P value</b> |
|---------------------------------------|-------------|-------------|-----------------------|----------------|
| <b><i>Risk of bias</i></b>            |             |             |                       |                |
| High risk (ref) (k=24)                |             |             |                       |                |
| Medium risk (k= 18)                   | -0.086      | 0.041       | -0.167; -0.005        | <b>0.037</b>   |
| Low risk (k=3)                        | -0.040      | 0.021       | -0.081; 0.001         | 0.058          |
| <b><i>Recruitment time</i></b>        |             |             |                       |                |
| First wave (ref) (k=35)               |             |             |                       |                |
| Second wave (k=4)                     | -0.030      | 0.037       | -0.103; 0.043         | 0.417          |
| Third wave (k=5)                      | 0.048       | 0.034       | -0.018; 0.114         | 0.157          |
| <b><i>Country</i></b>                 |             |             |                       |                |
| Asia (ref) (k=19)                     |             |             |                       |                |
| Africa (k=3)                          | 0.022       | 0.045       | -0.066; 0.109         | 0.627          |
| Europa (k=12)                         | 0.037       | 0.026       | -0.014; 0.089         | 0.158          |
| South America (k=6)                   | -0.013      | 0.033       | -0.078; 0.053         | 0.705          |
| North America (k=5)                   | 0.007       | 0.036       | -0.064; 0.079         | 0.837          |
| <b><i>Type of sample</i></b>          |             |             |                       |                |
| General adult population (ref) (k=41) |             |             |                       |                |
| Healthcare professionals (k<3)        | na          | na          | na                    | na             |
| Students (k=3)                        | 0.063       | 0.043       | -0.021; 0.147         | 0.142          |
| <b>% Female</b> (k=43)                | 0.000       | 0.000       | 0.000; 0.000          | <b>0.031</b>   |
| <b>Age</b> (k=27)                     | -0.003      | 0.001       | -0.006; -<0.001       | <b>0.017</b>   |
| <b>BMI</b> (k=22)                     | -0.006      | 0.007       | -0.020; 0.007         | 0.448          |
| <b><i>Outcome assessment</i></b>      |             |             |                       |                |
| Single item (ref) (k=26)              |             |             |                       |                |
| Standardized questionnaire (k=19)     | 0.009       | 0.021       | -0.033; 0.051         | 0.684          |

**Note:** na: not applicable, SE: standard error, 95% CI: 95% confidence interval; ref: reference category; the reference category was defined as the most numerous category; significant predictors in bold.

## Supplementary Table S8

*Metaregression of factor affecting prevalence of Excessive physical activity*

| Excessive physical activity           | EST.   | S.E.  | 95% CI of Est. | P value          |
|---------------------------------------|--------|-------|----------------|------------------|
| <b><i>Risk of bias</i></b>            |        |       |                |                  |
| High risk (ref) (k=13)                |        |       |                |                  |
| Medium risk (k=16)                    | 0.003  | 0.063 | -0.120; 0.126  | 0.959            |
| Low risk (k=5)                        | 0.112  | 0.089 | -0.062; 0.286  | 0.208            |
| <b><i>Recruitment time</i></b>        |        |       |                |                  |
| First wave (ref) (k=26)               |        |       |                |                  |
| Second wave (k=3)                     | 0.304  | 0.093 | 0.123; 0.486   | <b>&lt;0.001</b> |
| Third wave (k=<3)                     | na     | na    | na             | na               |
| <b><i>Country</i></b>                 |        |       |                |                  |
| Asia (ref) (k=13)                     |        |       |                |                  |
| Europa (k=11)                         | 0.007  | 0.048 | -0.086; 0.101  | 0.876            |
| South America (k<3)                   | na     | na    | na             | na               |
| North America (k= 8)                  | 0.290  | 0.053 | 0.187; 0.393   | <b>&lt;.001</b>  |
| <b><i>Type of sample</i></b>          |        |       |                |                  |
| General adult population (ref) (k=31) |        |       |                |                  |
| Healthcare professionals (k<3)        | na     | na    | na             | na               |
| Students (k<3)                        | na     | na    | na             | na               |
| <b>% Female</b> (k=32)                | 0.006  | 0.003 | .000; 0.011    | <b>0.034</b>     |
| <b>Age</b> (k=15)                     | -0.004 | 0.005 | -0.013; -0.006 | 0.439            |
| <b>BMI</b> (k=8)                      | 0.029  | 0.030 | -0.030; 0.088  | 0.335            |
| <b><i>Outcome assessment</i></b>      |        |       |                |                  |
| Single item (ref) (k=20)              |        |       |                |                  |
| Standardized questionnaire (k=14)     | 0.031  | 0.059 | -0.085; 0.146  | 0.602            |

**Note:** na: not applicable, SE: standard error, 95% CI: 95% confidence interval; ref: reference category; the reference category was defined as the most numerous category; significant predictors in bold.

## Supplementary Table S9

*Metaregression of factor affecting prevalence of Bingeing*

| <b>Bingeing</b>                      | <b>EST.</b> | <b>S.E.</b> | <b>95% CI of Est.</b> | <b>P value</b> |
|--------------------------------------|-------------|-------------|-----------------------|----------------|
| <b><i>Risk of bias</i></b>           |             |             |                       |                |
| High risk (ref) (k=5)                |             |             |                       |                |
| Medium risk (k=3)                    | 0.035       | 0.198       | -0.352; 0.422         | 0.858          |
| Low risk (k<3)                       | na          | na          | na                    | na             |
| <b><i>Recruitment time</i></b>       |             |             |                       |                |
| First wave (ref) (k=7)               |             |             |                       |                |
| Second wave (k<3)                    | na          | na          | na                    | na             |
| <b><i>Country</i></b>                |             |             |                       |                |
| Asia (ref) (k=2)                     |             |             |                       |                |
| Africa (k<3)                         | na          | na          | na                    | na             |
| Europa (k<3)                         | na          | na          | na                    | na             |
| South America (k<3)                  | na          | na          | na                    | na             |
| North America (k=3)                  | 0.210       | 0.152       | -0.088; 0.507         | 0.168          |
| <b><i>Type of sample</i></b>         |             |             |                       |                |
| General adult population (ref) (k=6) |             |             |                       |                |
| Healthcare professionals (k=3)       | -0.155      | 0.166       | -0.481; 0.171         | 0.352          |
| Students (k<3)                       | na          | na          | na                    | na             |
| <b>% Female</b> (k=10)               | -0.003      | 0.004       | -0.012; 0.005         | 0.485          |
| <b>Age</b> (k=7)                     | <0.000      | 0.014       | -0.026; 0.027         | 0.995          |
| <b>BMI</b> (k<3)                     | na          | na          | na                    | na             |
| <b><i>Outcome assessment</i></b>     |             |             |                       |                |
| Single item (ref) (k= 6)             |             |             |                       |                |
| Standardized questionnaire (k=4)     | -0.006      | 0.165       | -0.328; 0.317         | 0.973          |

**Note:** na: not applicable, SE: standard error, 95% CI: 95% confidence interval; ref: reference category; the reference category was defined as the most numerous category; significant predictors in bold.

## Supplementary Table S10

*Metaregression of factor affecting prevalence of Overeating*

| <b>Overeating</b>                     | <b>EST.</b> | <b>S.E.</b> | <b>95% CI of Est.</b> | <b>P value</b> |
|---------------------------------------|-------------|-------------|-----------------------|----------------|
| <b><i>Risk of bias</i></b>            |             |             |                       |                |
| High risk (ref) (k=16)                |             |             |                       |                |
| Medium risk (k=10)                    | -0.039      | 0.086       | -0.208; 0.130         | 0.652          |
| Low risk (k<3)                        | na          | na          | na                    | na             |
| <b><i>Recruitment time</i></b>        |             |             |                       |                |
| First wave (ref) (k=27)               |             |             |                       |                |
| Third wave (k<3)                      | na          | na          | na                    | na             |
| <b><i>Country</i></b>                 |             |             |                       |                |
| Asia (ref) (k= 9)                     |             |             |                       |                |
| Europa (k=11)                         | 0.071       | 0.096       | -0.117; 0.258         | 0.461          |
| South America (k=3)                   | 0.172       | 0.142       | -0.106; 0.450         | 0.225          |
| North America (k=5)                   | 0.015       | 0.119       | -0.218; 0.248         | 0.899          |
| <b><i>Type of sample</i></b>          |             |             |                       |                |
| General adult population (ref) (k=26) |             |             |                       |                |
| Students (k<3)                        | na          | na          | na                    | na             |
| <b>% Female</b> (k=28)                | <0.000      | <0.000      | -0.000; 0.001         | 0.734          |
| <b>Age</b> (k=16)                     | -0.004      | 0.007       | -0.018; 0.011         | 0.632          |
| <b>BMI</b> (k=10)                     | -0.040      | 0.048       | -0.135; 0.054         | 0.405          |
| <b><i>Outcome assessment</i></b>      |             |             |                       |                |
| Single item (ref) (k=18)              |             |             |                       |                |
| Standardized questionnaire (k=10)     | 0.191       | 0.074       | 0.045; 0.337          | <b>0.010</b>   |

**Note:** na: not applicable, SE: standard error, 95% CI: 95% confidence interval; ref: reference category; the reference category was defined as the most numerous category; significant predictors in bold.



## Supplementary Table S11

*Metaregression of factor affecting prevalence of Food craving*

| <b>Food craving</b>                  | <b>EST.</b> | <b>S.E.</b> | <b>95% CI of Est.</b> | <b>P value</b> |
|--------------------------------------|-------------|-------------|-----------------------|----------------|
| <b><i>Risk of bias</i></b>           |             |             |                       |                |
| High risk (ref) (k= 1)               |             |             |                       |                |
| Medium risk (k= 3)                   | -0.422      | 0.172       | -0.760; -0.084        | <b>0.014</b>   |
| <b><i>Recruitment time</i></b>       |             |             |                       |                |
| First wave (ref) (k=3)               |             |             |                       |                |
| Third wave (k<3)                     | na          | na          | na                    | na             |
| <b><i>Country</i></b>                |             |             |                       |                |
| Europa (k=3)                         |             |             |                       |                |
| South America (k<3)                  | na          | na          | na                    | na             |
| <b><i>Type of sample</i></b>         |             |             |                       |                |
| General adult population (ref) (k=3) |             |             |                       |                |
| Healthcare professionals (k<3)       | na          | na          | na                    | na             |
| <b>% Female</b> (k=4)                | -0.010      | 0.005       | -0.020; <0.000        | 0.063          |
| <b>Age</b> (k=4)                     | 0.003       | 0.019       | -0.034; 0.040         | 0.873          |
| <b>BMI</b> (k=3)                     | 1.009       | 1.038       | -1.025; 3.042         | 0.331          |
| <b><i>Outcome assessment</i></b>     |             |             |                       |                |
| Single item (ref) (k=3)              |             |             |                       |                |
| Standardized questionnaire (k=1)     | na          | na          | na                    | na             |

**Note:** na: not applicable, SE: standard error, 95% CI: 95% confidence interval; ref: reference category; the reference category was defined as the most numerous category; significant predictors in bold.

## Supplementary Table S12

*Metaregression of factor affecting prevalence of Snacking*

| <b>Snacking</b>                       | <b>EST.</b> | <b>S.E.</b> | <b>95% CI of Est.</b> | <b>P value</b> |
|---------------------------------------|-------------|-------------|-----------------------|----------------|
| <b><i>Risk of bias</i></b>            |             |             |                       |                |
| High risk (ref) (k= 5)                |             |             |                       |                |
| Medium risk (k= 3)                    | 0.060       | 0.055       | -0.048; 0.168         | 0.277          |
| Low risk (k<3)                        | na          | na          | na                    | na             |
| <b><i>Recruitment time</i></b>        |             |             |                       |                |
| First wave (ref) (k=7)                |             |             |                       |                |
| Second wave (k<3)                     | na          | na          | na                    | na             |
| <b><i>Country</i></b>                 |             |             |                       |                |
| Australia (ref) (k<3)                 |             |             |                       |                |
| Asia (k=14)                           | -0.278      | 0.186       | -0.642; 0.086         | 0.134          |
| Europa (k= 18)                        | -0.252      | 0.184       | -0.614; 0.109         | 0.171          |
| South America (k=3)                   | -0.180      | 0.206       | -0.584; 0.224         | 0.384          |
| North America (k=8)                   | -0.175      | 0.190       | -0.547; 0.198         | 0.358          |
| <b><i>Type of sample</i></b>          |             |             |                       |                |
| General adult population (ref) (k=40) |             |             |                       |                |
| Older adults (k<3)                    | na          | na          | na                    | na             |
| Students (k=3)                        | -0.012      | 0.108       | -0.223; 0.199         | 0.913          |
| <b>% Female</b> (k=43)                | <0.000      | 0.002       | -0.003; 0.004         | 0.843          |
| <b>Age</b> (k=23)                     | -<0.000     | 0.002       | -0.005; 0.004         | 0.929          |
| <b>BMI</b> (k=15)                     | 0.010       | 0.014       | -0.017; 0.036         | 0.482          |
| <b><i>Outcome assessment</i></b>      |             |             |                       |                |
| Single item (ref) (k= 27)             |             |             |                       |                |
| Standardized questionnaire (k=16)     | -0.013      | 0.056       | -0.123; 0.098         | 0.821          |

**Note:** na: not applicable, SE: standard error, 95% CI: 95% confidence interval; ref: reference category; the reference category was defined as the most numerous category; significant predictors in bold.

## Supplementary Table S13

*Metaregression of factor affecting prevalence of Emotional eating*

| <b>Emotional eating</b>               | <b>EST.</b> | <b>S.E.</b> | <b>95% CI of Est.</b> | <b>P value</b> |
|---------------------------------------|-------------|-------------|-----------------------|----------------|
| <b><i>Risk of bias</i></b>            |             |             |                       |                |
| High risk (ref) (k=9)                 |             |             |                       |                |
| Medium risk (k=7)                     | -0.085      | 0.006       | -0.214; 0.044         | 0.196          |
| Low risk (k<3)                        | na          | na          | na                    | na             |
| <b><i>Recruitment time</i></b>        |             |             |                       |                |
| First wave (ref) (k=14)               |             |             |                       |                |
| Second wave (k<3)                     | na          | na          | na                    | na             |
| <b><i>Country</i></b>                 |             |             |                       |                |
| Asia (ref) (k= 6)                     |             |             |                       |                |
| Africa (k<3)                          | na          | na          | na                    | na             |
| Europa (k=5)                          | 0.100       | 0.102       | -0.100; 0.301         | 0.327          |
| North America (k=5)                   | 0.044       | 0.102       | -0.157; 0.244         | 0.670          |
| <b><i>Type of sample</i></b>          |             |             |                       |                |
| General adult population (ref) (k=14) |             |             |                       |                |
| Women (k=<3)                          | na          | na          | na                    | na             |
| Students (k=<3)                       | na          | na          | na                    | na             |
| <b>% Female</b> (k= 15)               | -0.002      | 0.004       | -0.010; 0.005         | 0.494          |
| <b>Age</b> (k=14)                     | 0.009       | 0.006       | -0.002; 0.021         | 0.114          |
| <b>BMI</b> (k=8)                      | 0.031       | 0.043       | -0.053; 0.116         | 0.468          |
| <b><i>Outcome assessment</i></b>      |             |             |                       |                |
| Single item (ref) (k=7)               |             |             |                       |                |
| Standardized questionnaire (k=10)     | 0.024       | 0.080       | -0.133; 0.180         | 0.768          |

**Note:** na: not applicable, SE: standard error, 95% CI: 95% confidence interval; ref: reference category; the reference category was defined as the most numerous category; significant predictors in bold.

## Supplementary Figure S1

*Forrest and Funnel Plot of weight gain in general population during the pandemic. 95% CI = 95% confidence interval; ES = effect size*

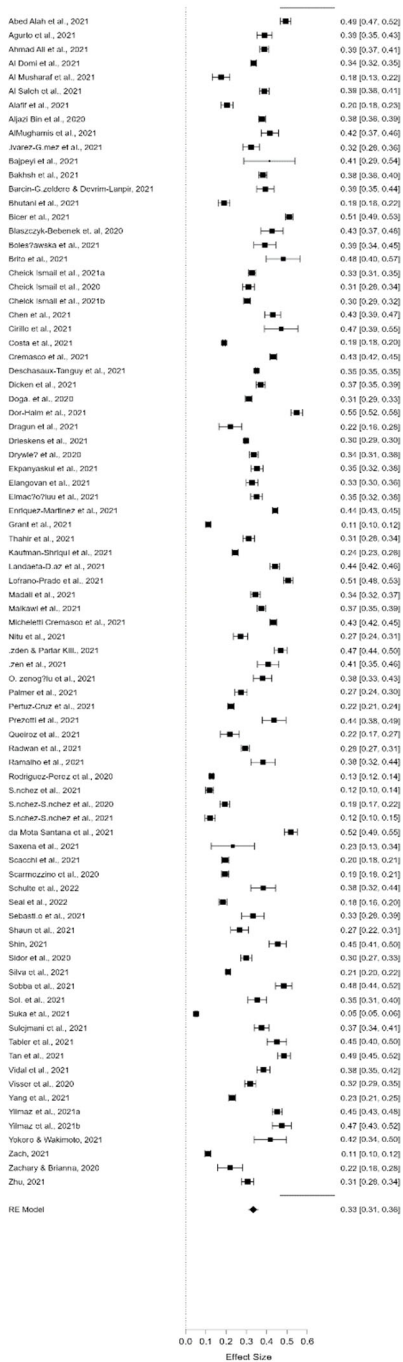

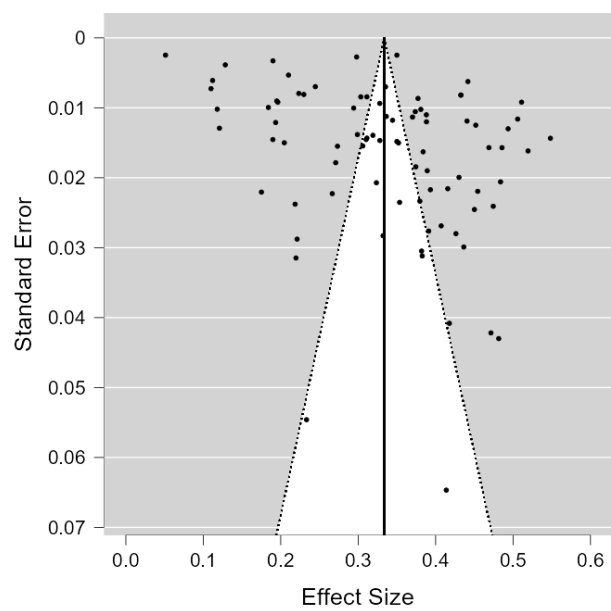

**Supplementary Figure S2**

*Forrest and Funnel Plot of food restriction in general population during the pandemic. 95% CI = 95% confidence interval; ES = effect size*

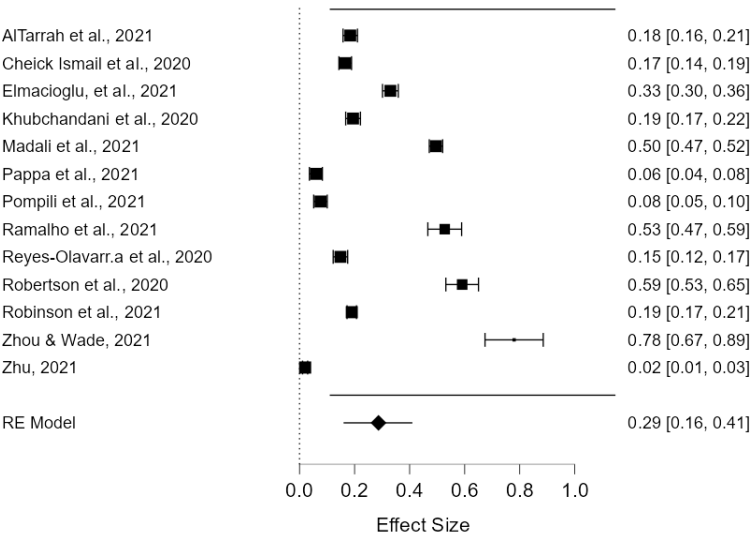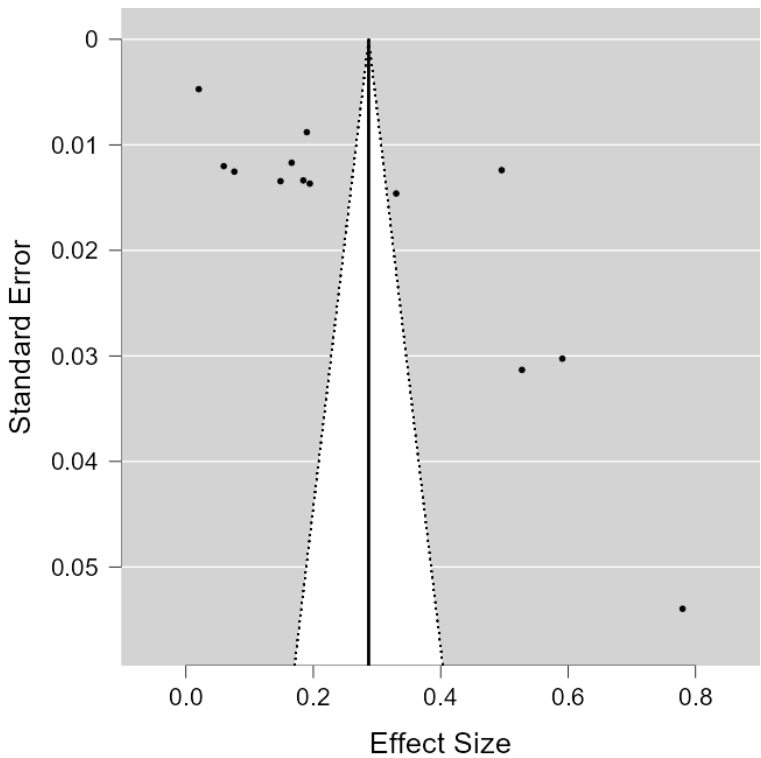

Supplementary Figure S3

Forrest and Funnel Plot of Body shape concerns in general population during the pandemic. 95% CI = 95% confidence interval; ES = effect size

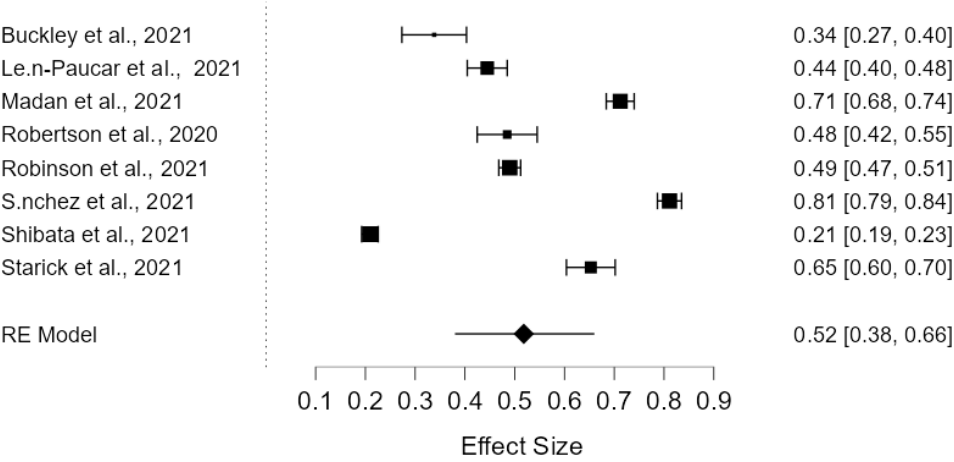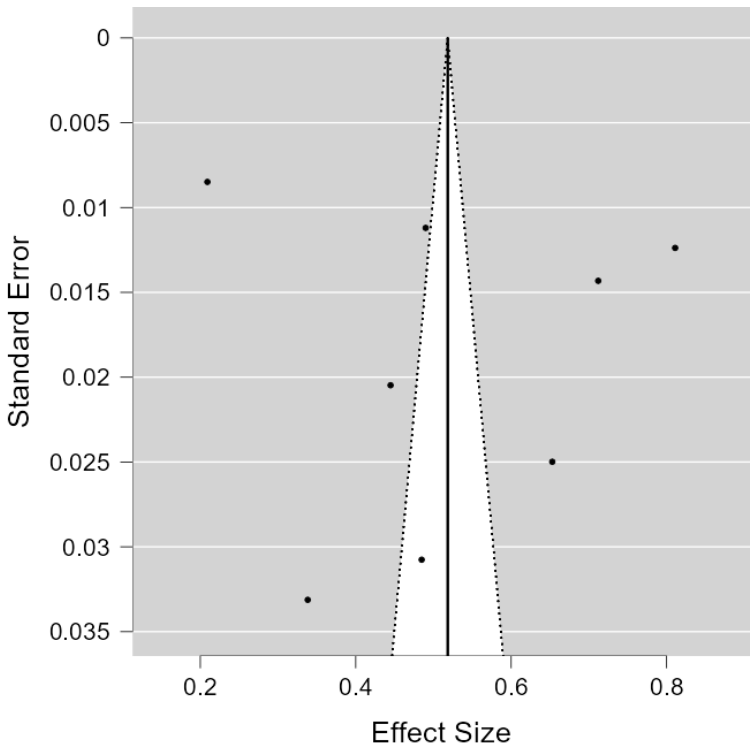

# Supplementary Figure S4

Forrest and Funnel Plot of weight loss in general population during the pandemic. 95% CI = 95% confidence interval; ES = effect size

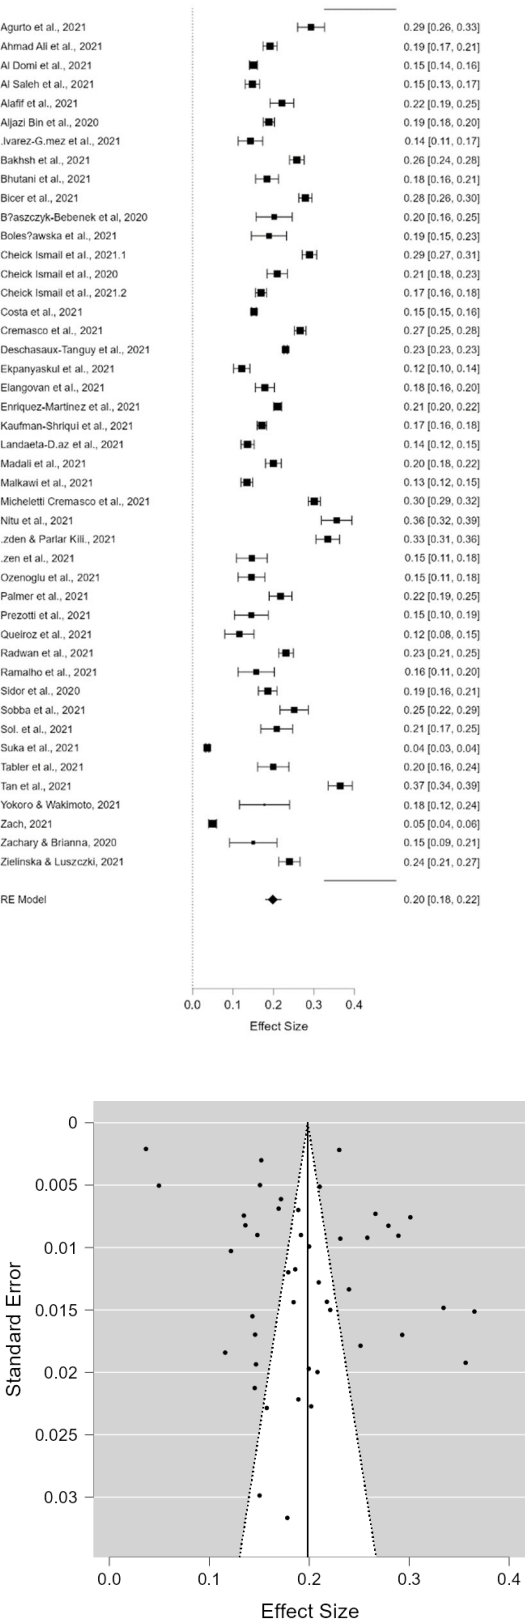



Supplementary Figure S5

Forrest and Funnel Plot of excessive physical activity in general population during the pandemic.  
95% CI = 95% confidence interval; ES = effect size

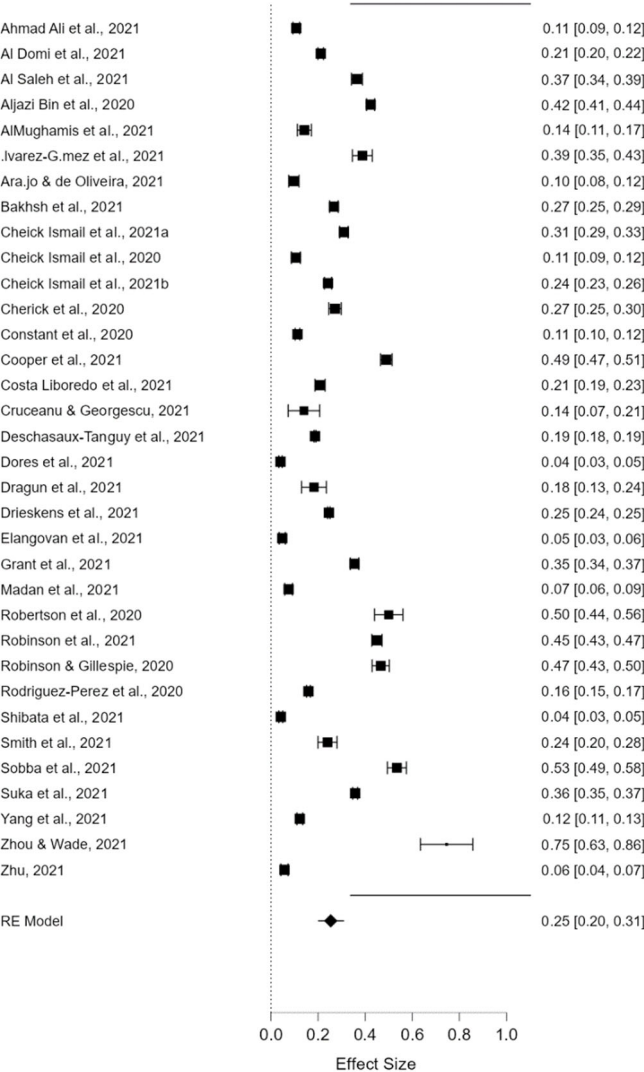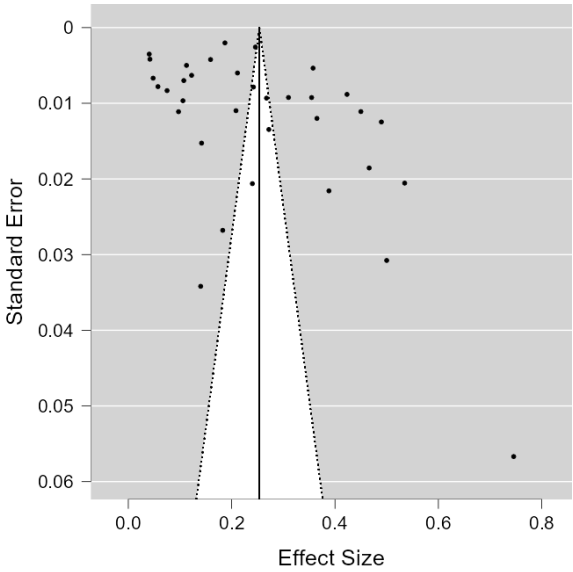

**Supplementary Figure S6**

*Forrest and Funnel Plot of bingeing in general population during the pandemic. 95% CI = 95% confidence interval; ES = effect size*

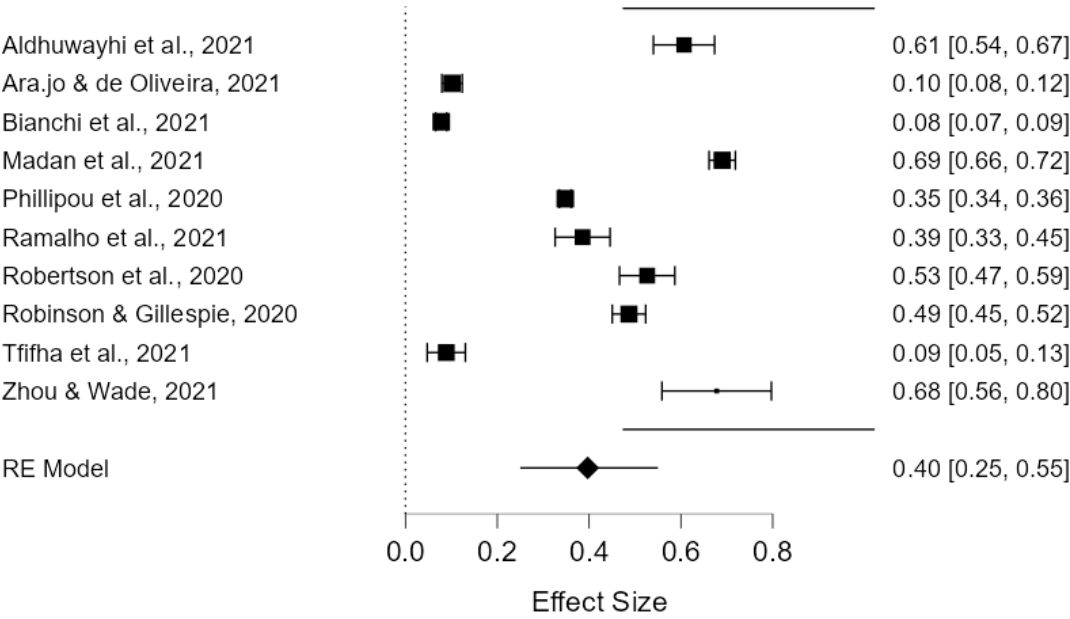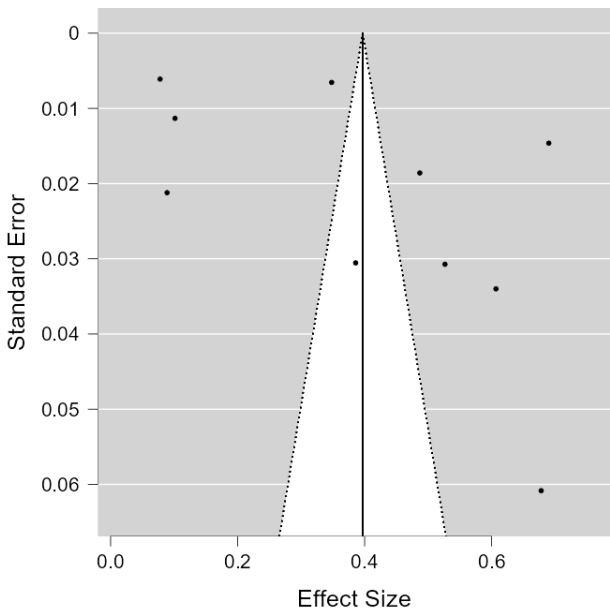

Supplementary Figure S7

Forrest and Funnel Plot of overeating in general population during the pandemic. 95% CI = 95% confidence interval; ES = effect size

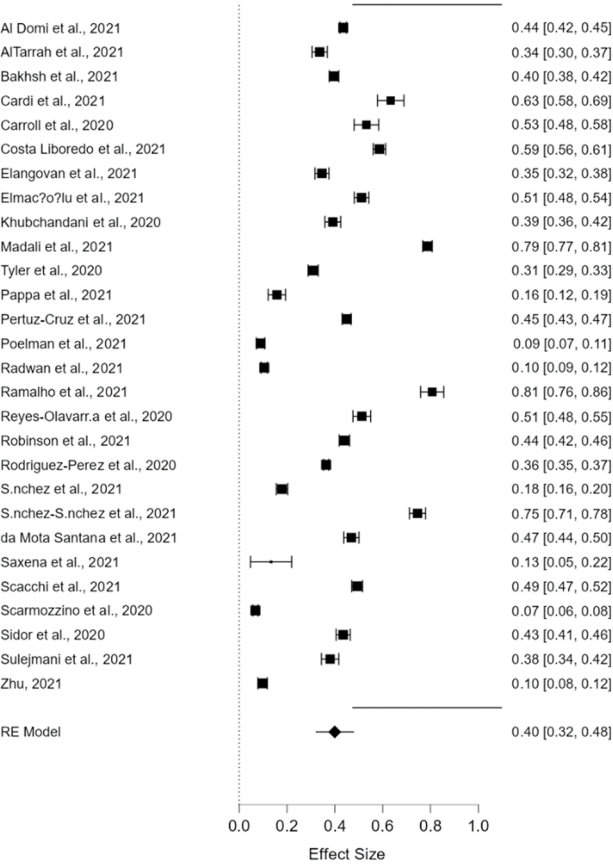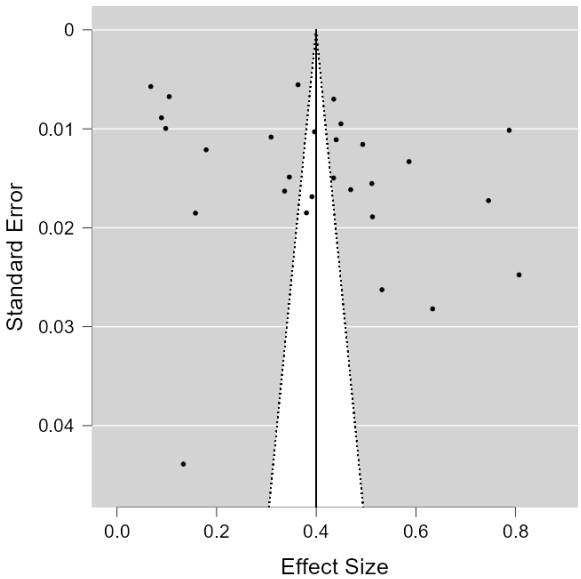

Supplementary Figure S8

Forrest and Funnel Plot of food craving in general population during the pandemic. 95% CI = 95% confidence interval; ES = effect size

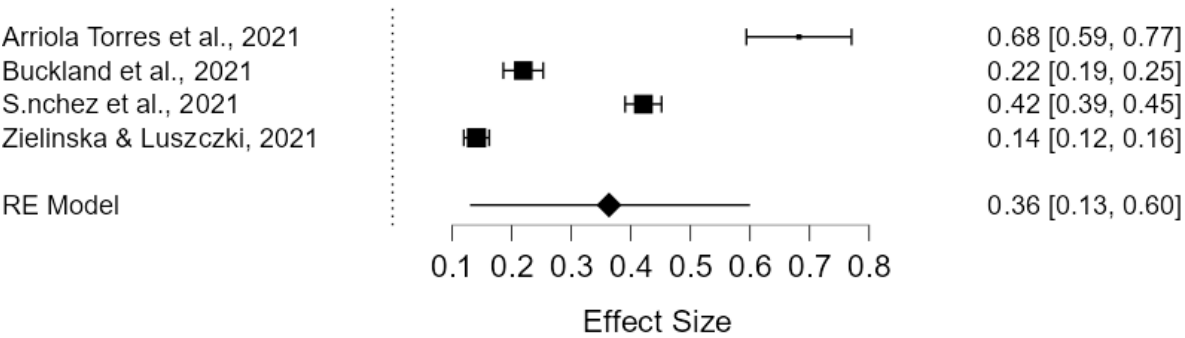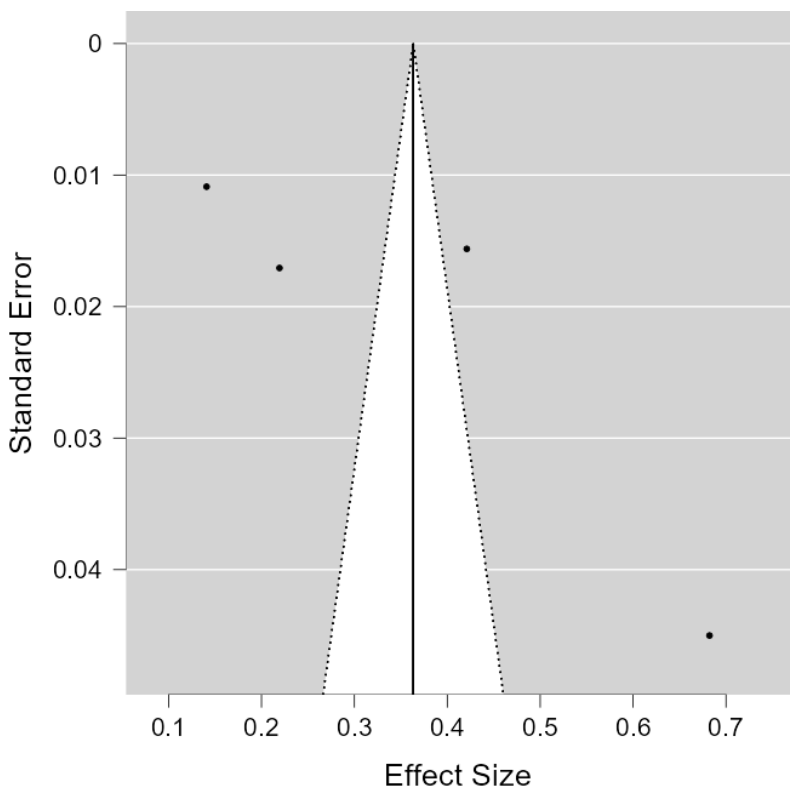

Supplementary Figure S9

*Forrest and Funnel Plot of snacking in general population during the pandemic. 95% CI = 95% confidence interval; ES = effect size*

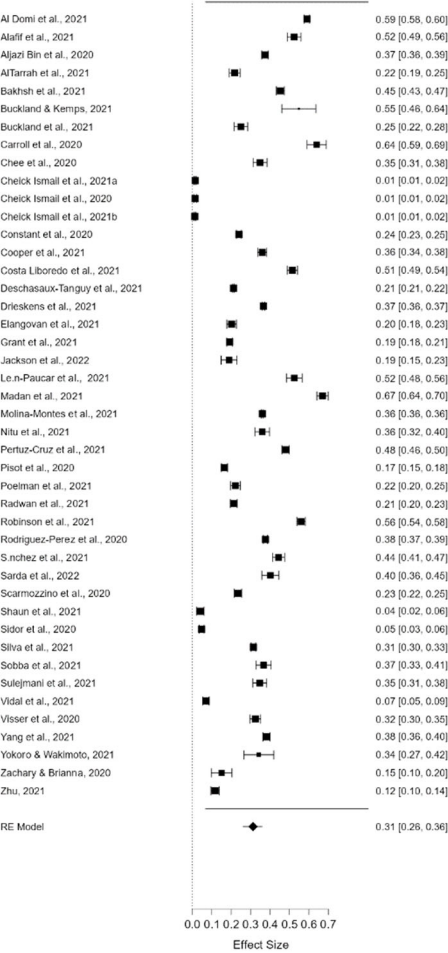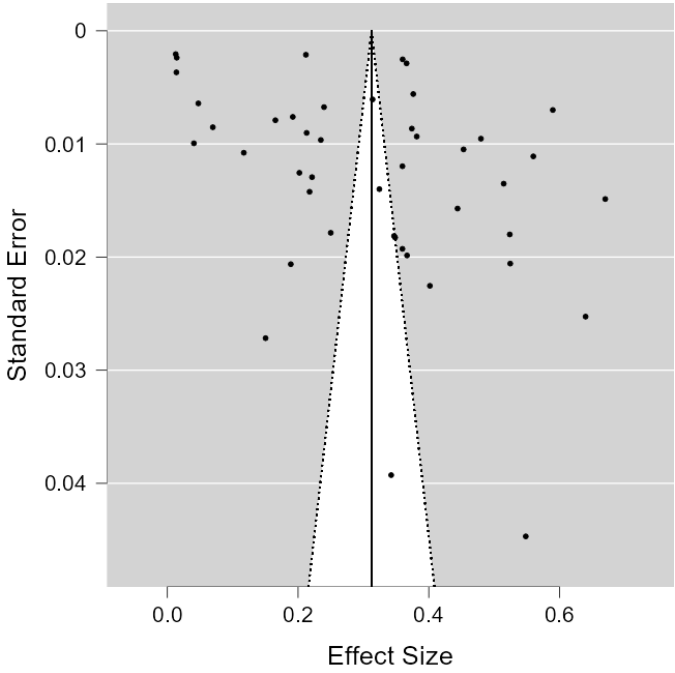

**Supplementary Figure S10**

*Forrest and Funnel Plot of night eating in general population during the pandemic. 95% CI = 95% confidence interval; ES = effect size*

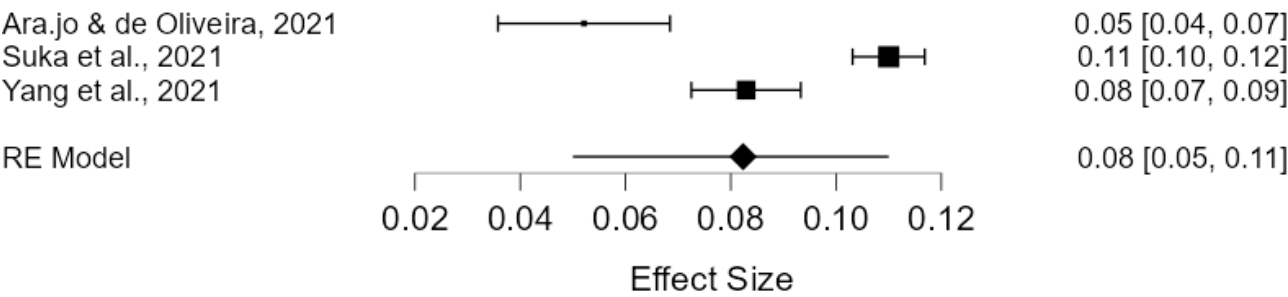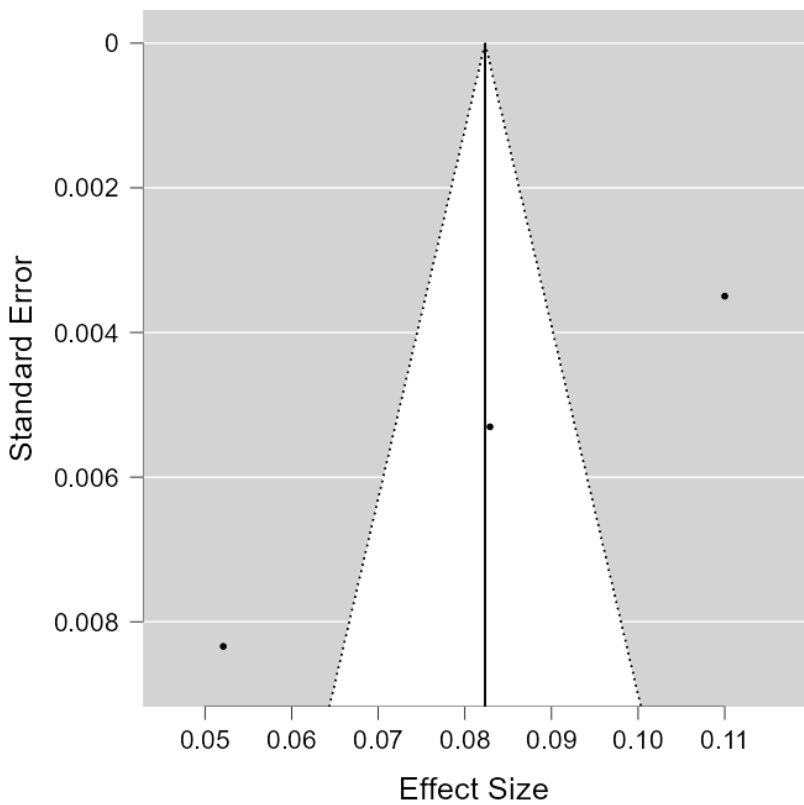

Supplementary Figure S11

Forrest and Funnel Plot of emotional eating in general population during the pandemic. 95% CI = 95% confidence interval; ES = effect size

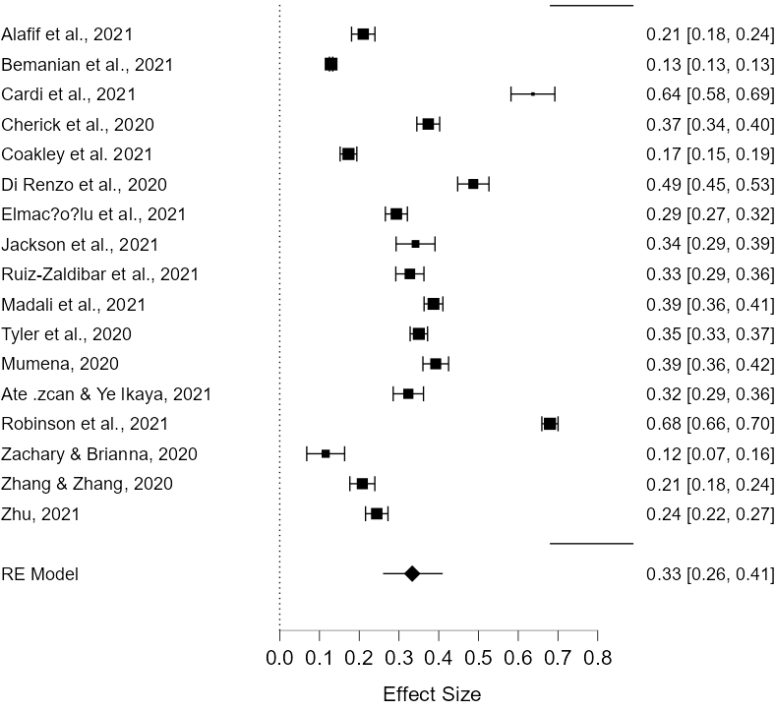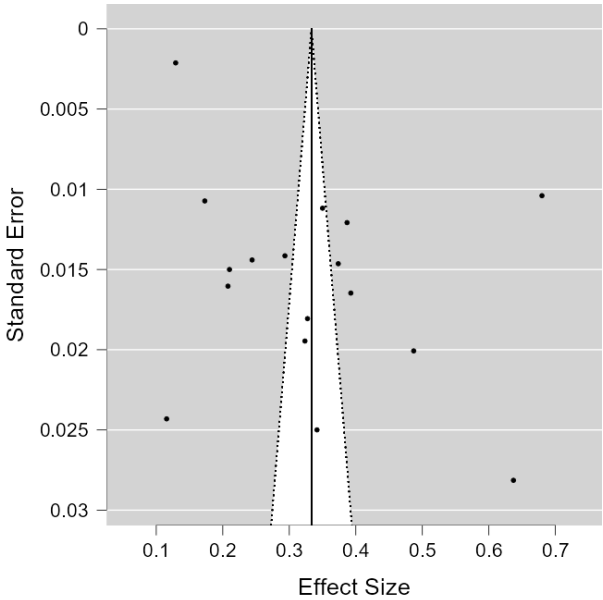

**Supplementary Figures S12**

*Forrest and Funnel Plot of change in weight gain from pre-pandemic to pandemic time.*

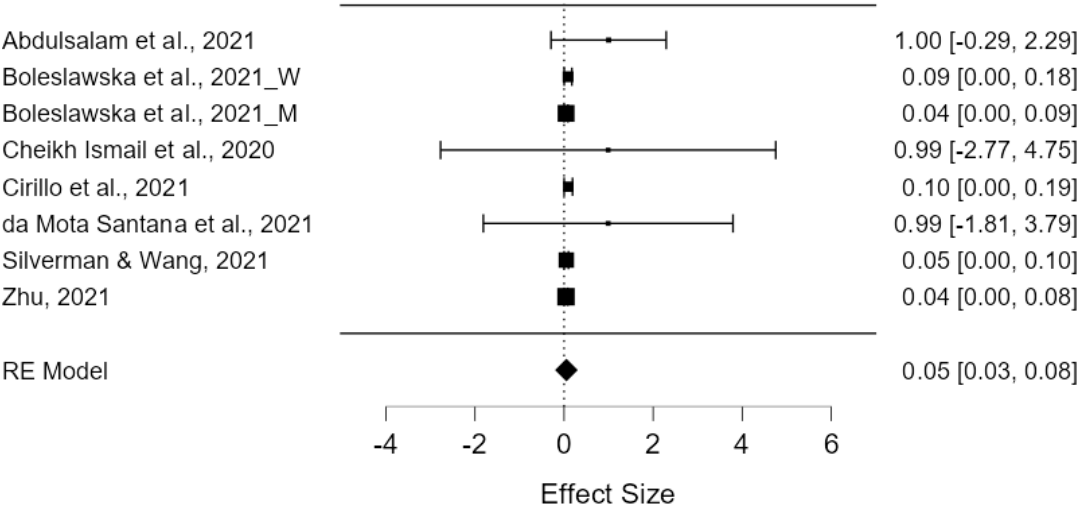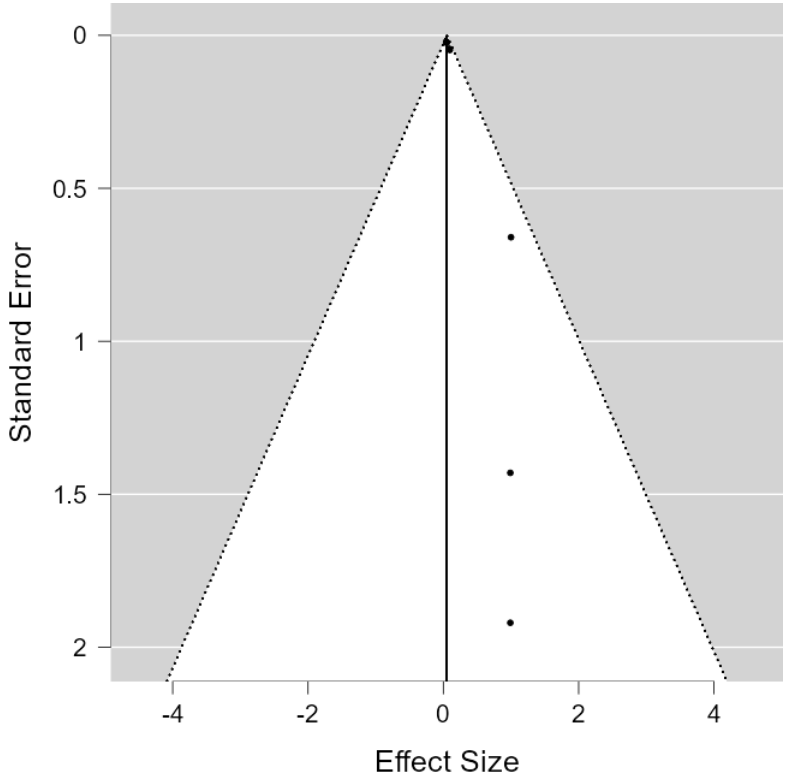



**Supplementary Figure S13**

*Forrest and Funnel Plot of change in weight gain during the pandemic.*

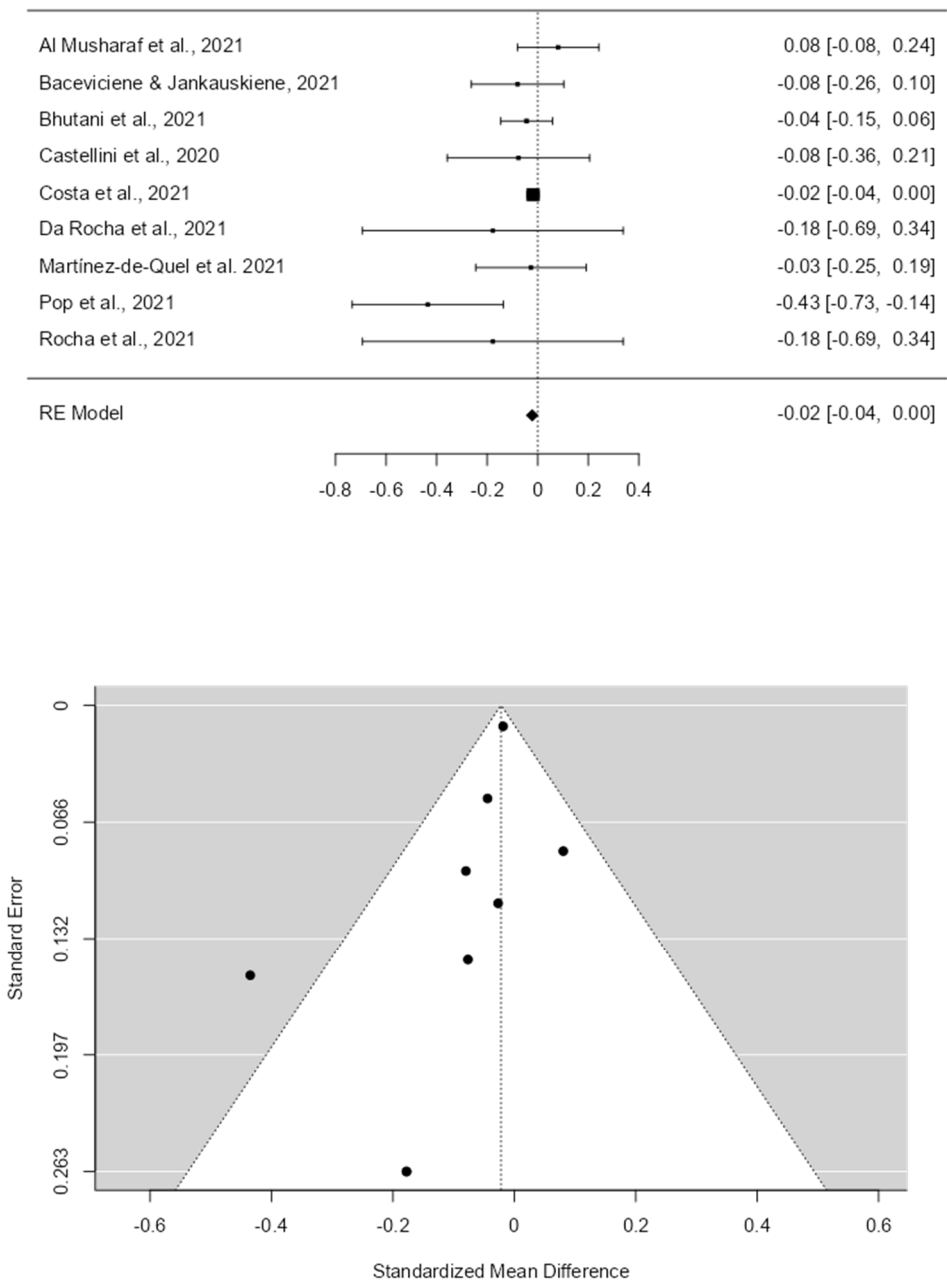

**Supplementary Figure S14**

*Forrest and Funnel Plot of change in food restriction from pre-pandemic to pandemic time.*

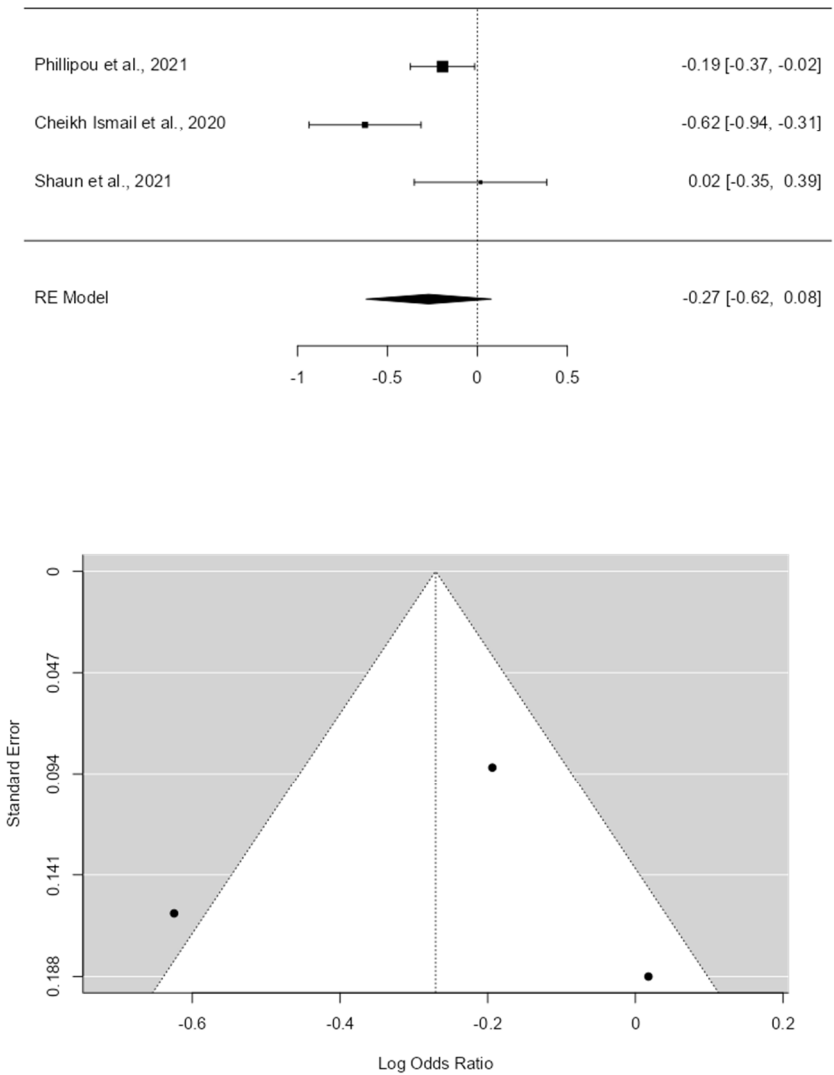

**Supplementary Figure S15**

*Forrest and Funnel Plot of change in excessive physical exercise from pre-pandemic to pandemic time.*

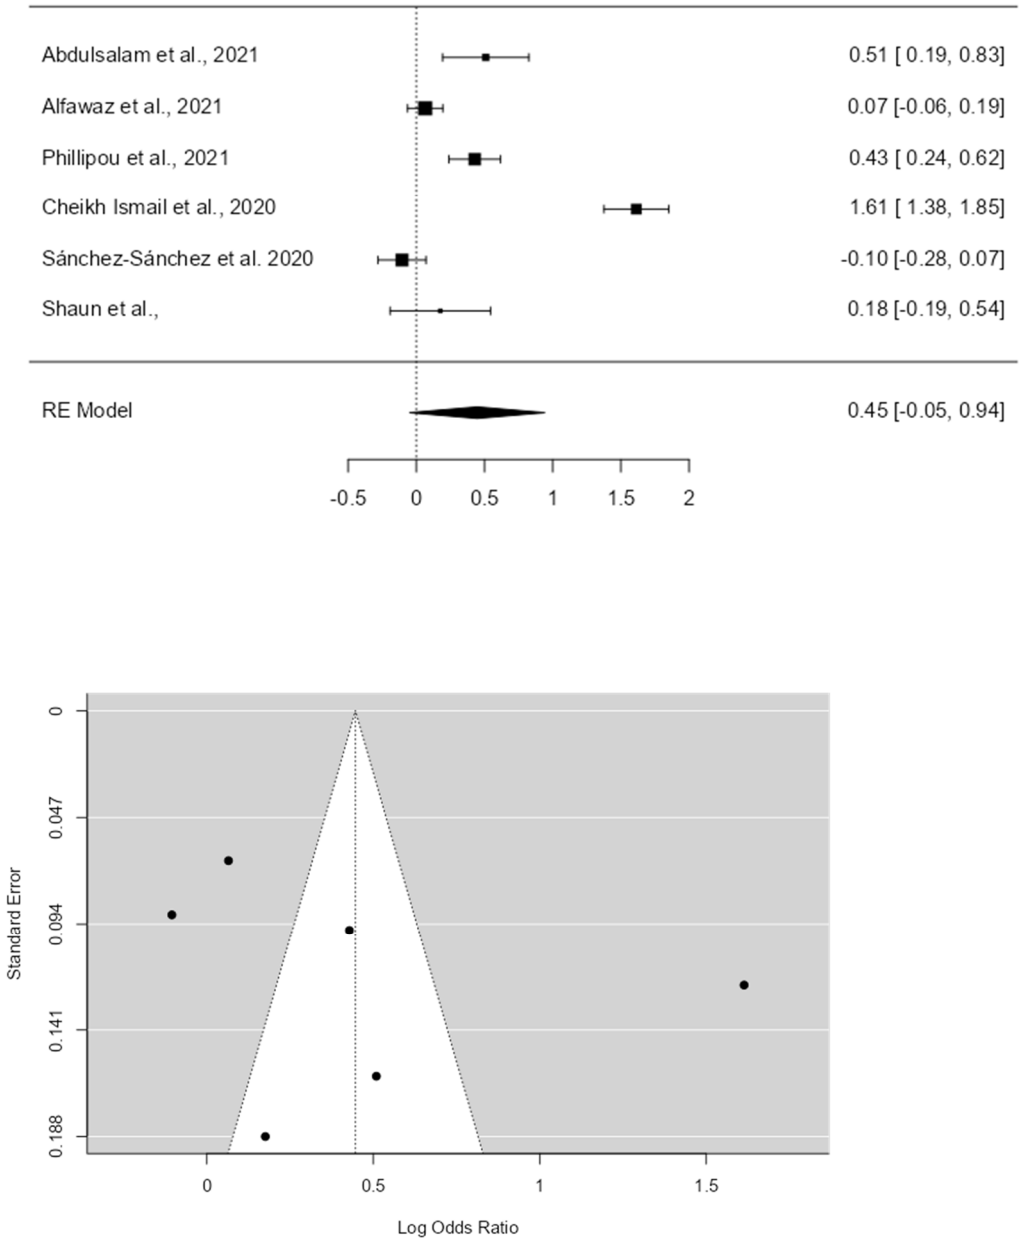

**Supplementary Figure S16**

*Forrest and Funnel Plot of change in excessive binge eating from pre-pandemic to pandemic time.*

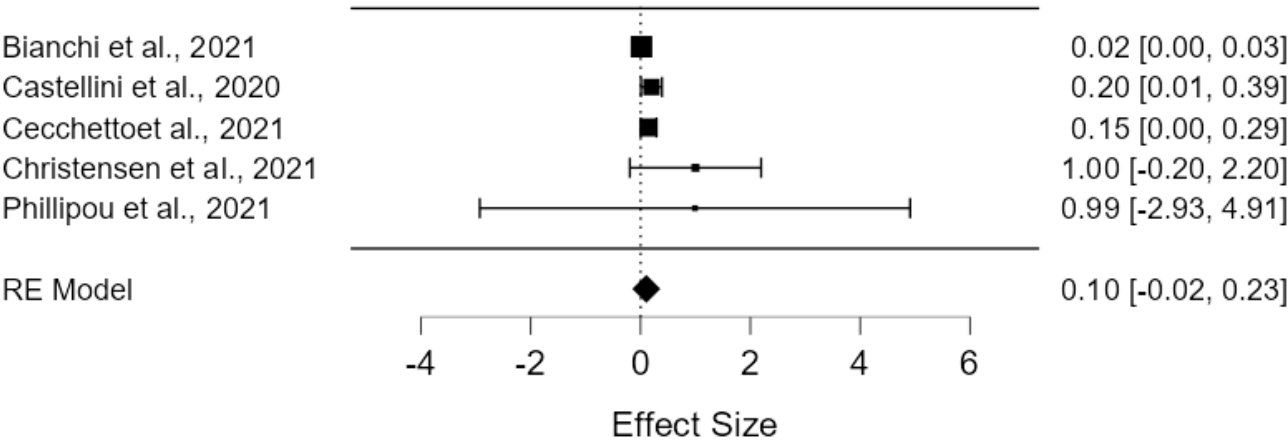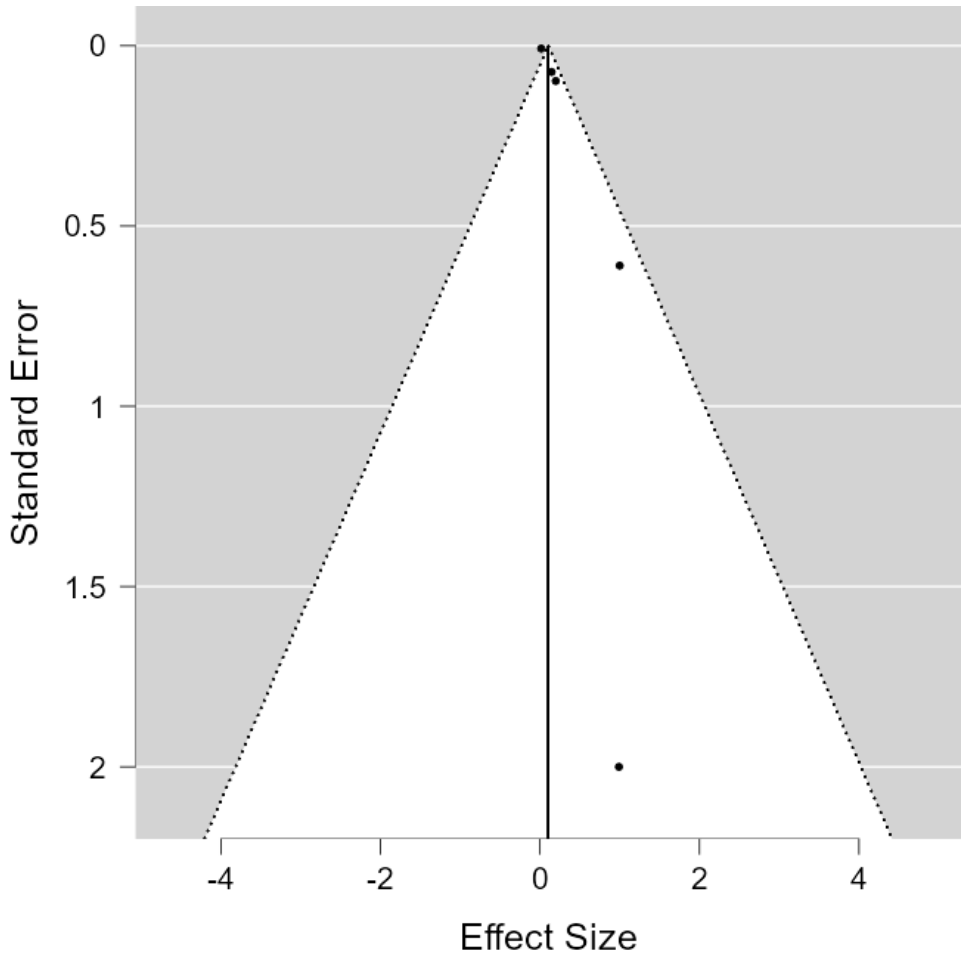

## References

1. Abdulsalam, N. M.; Khateeb, N. A.; Aljerbi, S. S.; Alqumayzi, W. M.; Balubaid, S. S.; Almarghlani, A. A.; Ayad, A. A.; Williams, L. L. Assessment of Dietary Habits and Physical Activity Changes during the Full COVID-19 Curfew Period and Its Effect on Weight among Adults in Jeddah, Saudi Arabia. *Int J Environ Res Public Health* **2021**, *18* (16), 8580. <https://doi.org/10.3390/ijerph18168580>.
2. Abed Alah, M.; Abdeen, S.; Kehyayan, V.; Bougmiza, I. Impact of Staying at Home Measures during COVID-19 Pandemic on the Lifestyle of Qatar's Population: Perceived Changes in Diet, Physical Activity, and Body Weight. *Prev Med Rep* **2021**, *24*, 101545. <https://doi.org/10.1016/j.pmedr.2021.101545>.
3. Agurto, H. S.; Alcantara-Diaz, A. L.; Espinet-Coll, E.; Toro-Huamanchumo, C. J. Eating Habits, Lifestyle Behaviors and Stress during the COVID-19 Pandemic Quarantine among Peruvian Adults. *PeerJ* **2021**, *9*, e11431. <https://doi.org/10.7717/peerj.11431>.
4. Al-Domi, H.; AL-Dalaeen, A.; AL-Rosan, S.; Batarseh, N.; Nawaiseh, H. Healthy Nutritional Behavior during COVID-19 Lockdown: A Cross-Sectional Study. *Clin Nutr ESPEN* **2021**, *42*, 132–137. <https://doi.org/10.1016/j.clnesp.2021.02.003>.
5. Al-Musharaf, S. Prevalence and Predictors of Emotional Eating among Healthy Young Saudi Women during the COVID-19 Pandemic. *Nutrients* **2020**, *12* (10), 2923. <https://doi.org/10.3390/nu12102923>.
6. Al-Musharaf, S.; Aljuraiban, G.; Bogis, R.; Alnafisah, R.; Aldhwayan, M.; Tahrani, A. Lifestyle Changes Associated with COVID-19 Quarantine among Young Saudi Women: A Prospective Study. *PLoS One* **2021**, *16* (4), e0250625. <https://doi.org/10.1371/journal.pone.0250625>.
7. Al-Saleh, M.; Alamri, A.; Alhefzi, A.; Assiri, K.; Moshebah, A. Population Healthy Lifestyle Changes in Abha City during COVID-19 Lockdown, Saudi Arabia. *J Family Med Prim Care* **2021**, *10* (2), 809. [https://doi.org/10.4103/jfmpc.jfmpc\\_1224\\_20](https://doi.org/10.4103/jfmpc.jfmpc_1224_20).
8. Alafif, N. O.; Abdelfattah, E. H.; Al hadi, R. A.; Alanazi, S. B.; Alkabaa, R. I.; Alsalem, F. A.; Aljeldah, T. M.; Aldriweesh, K. K.; Albati, A. A. Effect of Quarantine on Eating Behaviors and Weight Change among King Saud University Students in Riyadh. *J King Saud Univ Sci* **2021**, *33* (8), 101609. <https://doi.org/10.1016/j.jksus.2021.101609>.
9. Aldhuwayhi, S.; Shaikh, S. A.; Mallineni, S. K.; Kumari, V. V.; Thakare, A. A.; Ahmed Khan, A. R.; Mustafa, M. Z.; Manva, M. Z. Occupational Stress and Stress Busters Used Among Saudi Dental Practitioners During the COVID-19 Pandemic Outbreak. *Disaster Med Public Health Prep* **2022**, *16* (5), 1975–1981. <https://doi.org/10.1017/dmp.2021.215>.
10. Alfawaz, H.; Amer, O. E.; Aljumah, A. A.; Aldisi, D. A.; Enani, M. A.; Aljohani, N. J.; Alotaibi, N. H.; Alshingetti, N.; Alomar, S. Y.; Khattak, M. N. K.; Sabico, S.; Al-Daghri, N. M. Effects of Home Quarantine during COVID-19 Lockdown on Physical Activity and Dietary Habits of Adults in Saudi Arabia. *Sci Rep* **2021**, *11* (1), 5904. <https://doi.org/10.1038/s41598-021-85330-2>.
11. Ali, A.; Sohaib, M.; Iqbal, S.; Hayat, K.; Khan, A. U.; Rasool, M. F. Evaluation of COVID-19 Disease Awareness and Its Relation to Mental Health, Dietary Habits, and Physical Activity: A Cross-Sectional Study from Pakistan. *Am J Trop Med Hyg* **2021**, *104* (5), 1687–1693. <https://doi.org/10.4269/ajtmh.20-1451>.
12. AlMughamis, N.; AlAsfour, S.; Mehmood, S. Poor Eating Habits and Predictors of Weight Gain during the COVID-19 Quarantine Measures in Kuwait: A Cross Sectional Study. *F1000Res* **2020**, *9*, 914. <https://doi.org/10.12688/f1000research.25303.1>.
13. AlTarrah, D.; AlShami, E.; AlHamad, N.; AlBesher, F.; Devarajan, S. The Impact of Coronavirus COVID-19 Pandemic on Food Purchasing, Eating Behavior, and Perception of Food Safety in Kuwait. *Sustainability* **2021**, *13* (16), 8987. <https://doi.org/10.3390/su13168987>.

14. Álvarez-Gómez, C.; De La Higuera, M.; Rivas-García, L.; Diaz-Castro, J.; Moreno-Fernandez, J.; Lopez-Frias, M. Has COVID-19 Changed the Lifestyle and Dietary Habits in the Spanish Population after Confinement? *Foods* **2021**, *10* (10), 2443. <https://doi.org/10.3390/foods10102443>.
15. Ammar, A.; Brach, M.; Trabelsi, K.; Chtourou, H.; Boukhris, O.; Masmoudi, L.; Bouaziz, B.; Bentlage, E.; How, D.; Ahmed, M.; Müller, P.; Müller, N.; Aloui, A.; Hammouda, O.; Paineiras-Domingos, L.; Braakman-Jansen, A.; Wrede, C.; Bastoni, S.; Pernambuco, C.; Mataruna, L.; Taheri, M.; Irandoust, K.; Khacharem, A.; Bragazzi, N.; Chamari, K.; Glenn, J.; Bott, N.; Gargouri, F.; Chaari, L.; Batatia, H.; Ali, G.; Abdelkarim, O.; Jarraya, M.; El Abed, K.; Souissi, N.; Van Gemert-Pijnen, L.; Riemann, B.; Riemann, L.; Moalla, W.; Gómez-Raja, J.; Epstein, M.; Sanderman, R.; Schulz, S.; Jerg, A.; Al-Horani, R.; Mansi, T.; Jmail, M.; Barbosa, F.; Ferreira-Santos, F.; Šimunič, B.; Pišot, R.; Gaggioli, A.; Bailey, S.; Steinacker, J.; Driss, T.; Hoekelmann, A. Effects of COVID-19 Home Confinement on Eating Behaviour and Physical Activity: Results of the ECLB-COVID19 International Online Survey. *Nutrients* **2020**, *12* (6), 1583. <https://doi.org/10.3390/nu12061583>.
16. Arriola Torres, L. F.; Palomino Taype, K. R.; Quintana Castro, L. Calidad de Sueño y Antojo Por Azúcares En Médicos Residentes Durante La Pandemia de COVID-19 En El Perú. *Neurología Argentina* **2021**, *13* (1), 7–13. <https://doi.org/10.1016/j.neuarg.2021.01.004>.
17. Baceviciene, M.; Jankauskiene, R. Changes in Sociocultural Attitudes towards Appearance, Body Image, Eating Attitudes and Behaviours, Physical Activity, and Quality of Life in Students before and during COVID-19 Lockdown. *Appetite* **2021**, *166*, 105452. <https://doi.org/10.1016/j.appet.2021.105452>.
18. Bajpeyi, S.; Jung, H.; Carrillo, I. A.; Nunez, A. V.; Umucu, E. Role Of Mental Health On Weight Gain During Covid-19 Pandemic Among Older Adults In Subsidized Housing. *University of Texas at El Paso*. 2021.
19. Bakhsh, M. A.; Khawandanah, J.; Naaman, R. K.; Alashmali, S. The Impact of COVID-19 Quarantine on Dietary Habits and Physical Activity in Saudi Arabia: A Cross-Sectional Study. *BMC Public Health* **2021**, *21* (1), 1487. <https://doi.org/10.1186/s12889-021-11540-y>.
20. Barcln-Güzeldere, H. K.; Devrim-Lanpir, A. The Association between Body Mass Index, Emotional Eating and Perceived Stress during COVID-19 Partial Quarantine in Healthy Adults. *Public Health Nutr* **2022**, *25* (1), 43–50. <https://doi.org/10.1017/S1368980021002974>.
21. Bemanian, M.; Mæland, S.; Blomhoff, R.; Rabben, Å. K.; Arnesen, E. K.; Skogen, J. C.; Fadnes, L. T. Emotional Eating in Relation to Worries and Psychological Distress Amid the COVID-19 Pandemic: A Population-Based Survey on Adults in Norway. *Int J Environ Res Public Health* **2020**, *18* (1), 130. <https://doi.org/10.3390/ijerph18010130>.
22. Bhutani, S.; vanDellen, M. R.; Haskins, L. B.; Cooper, J. A. Energy Balance-Related Behavior Risk Pattern and Its Correlates During COVID-19 Related Home Confinement. *Front Nutr* **2021**, *8*. <https://doi.org/10.3389/fnut.2021.680105>.
23. Bhutani, S.; Vandellen, M. R.; Cooper, J. A. Longitudinal Weight Gain and Related Risk Behaviors during the Covid-19 Pandemic in Adults in the Us. *Nutrients* **2021**, *13* (2), 1–14. <https://doi.org/10.3390/nu13020671>.
24. Bianchi, D.; Baiocco, R.; Pompili, S.; Lonigro, A.; Di Norcia, A.; Cannoni, E.; Longobardi, E.; Zammuto, M.; Di Tata, D.; Laghi, F. Binge Eating and Binge Drinking in Emerging Adults During COVID-19 Lockdown in Italy: An Examination of Protective and Risk Factors. *Emerging Adulthood* **2022**, *10* (1), 291–303. <https://doi.org/10.1177/21676968211058501>.
25. Biçer, N. Ç.; Baş, M.; Köse, G.; Duru, P. Ş.; Baş, D.; Karaca, E.; Köseoğlu, S. Lockdown Changed Us in Turkey Eating Behaviors, Depression Levels, and Body Weight Changes during Lockdown. *Progress in Nutrition* **2021**, *23* (3), 11–11. <https://doi.org/10.23751/pn.v23i3.11856>.
26. Bin Zarah, A.; Enriquez-Marulanda, J.; Andrade, J. M. Relationship between Dietary Habits, Food Attitudes and Food Security Status among Adults Living within the United States Three Months

- Post-Mandated Quarantine: A Cross-Sectional Study. *Nutrients* **2020**, *12* (11), 3468. <https://doi.org/10.3390/nu12113468>.
27. Błaszczuk-Bębenek, E.; Jagielski, P.; Bolesławska, I.; Jagielska, A.; Nitsch-Osuch, A.; Kawalec, P. Nutrition Behaviors in Polish Adults before and during COVID-19 Lockdown. *Nutrients* **2020**, *12* (10), 3084. <https://doi.org/10.3390/nu12103084>.
  28. Bolesławska, I.; Błaszczuk-Bębenek, E.; Jagielski, P.; Jagielska, A.; Przysławski, J. Nutritional Behaviors of Women and Men in Poland during Confinement Related to the SARS-CoV-2 Epidemic. *Sci Rep* **2021**, *11* (1), 19984. <https://doi.org/10.1038/s41598-021-99561-w>.
  29. Boukrim, M.; Obtel, M.; Kasouati, J.; Achbani, A.; Razine, R. Covid-19 and Confinement: Effect on Weight Load, Physical Activity and Eating Behavior of Higher Education Students in Southern Morocco. *Ann Glob Health* **2021**, *87* (1), 7. <https://doi.org/10.5334/aogh.3144>.
  30. Breiner, C. E.; Miller, M. L.; Hormes, J. M. Changes in Eating and Exercise Behaviors during the COVID-19 Pandemic in a Community Sample: A Retrospective Report. *Eat Behav* **2021**, *42*, 101539. <https://doi.org/10.1016/j.eatbeh.2021.101539>.
  31. Brito, L. M. S.; Lima, V. A. de; Mascarenhas, L. P.; Mota, J.; Leite, N. PHYSICAL ACTIVITY, EATING HABITS AND SLEEP DURING SOCIAL ISOLATION: FROM YOUNG ADULT TO ELDERLY. *Revista Brasileira de Medicina do Esporte* **2021**, *27* (1), 21–25. [https://doi.org/10.1590/1517-8692202127012020\\_0061](https://doi.org/10.1590/1517-8692202127012020_0061).
  32. Buckland, N. J.; Kemps, E. Low Craving Control Predicts Increased High Energy Density Food Intake during the COVID-19 Lockdown: Result Replicated in an Australian Sample. *Appetite* **2021**, *166*, 105317. <https://doi.org/10.1016/j.appet.2021.105317>.
  33. Buckland, N. J.; Swinnerton, L. F.; Ng, K.; Price, M.; Wilkinson, L. L.; Myers, A.; Dalton, M. Susceptibility to Increased High Energy Dense Sweet and Savoury Food Intake in Response to the COVID-19 Lockdown: The Role of Craving Control and Acceptance Coping Strategies. *Appetite* **2021**, *158*, 105017. <https://doi.org/10.1016/j.appet.2020.105017>.
  34. Buckley, G. L.; Hall, L. E.; Lassemillante, A.-C. M.; Belski, R. Disordered Eating & Body Image of Current and Former Athletes in a Pandemic; a Convergent Mixed Methods Study - What Can We Learn from COVID-19 to Support Athletes through Transitions? *J Eat Disord* **2021**, *9* (1), 73. <https://doi.org/10.1186/s40337-021-00427-3>.
  35. Cardi, V.; Albano, G.; Gentili, C.; Sudulich, L. The Impact of Emotion Regulation and Mental Health Difficulties on Health Behaviours during COVID19. *J Psychiatr Res* **2021**, *143*, 409–415. <https://doi.org/10.1016/j.jpsychires.2021.10.001>.
  36. Carroll, N.; Sadowski, A.; Laila, A.; Hruska, V.; Nixon, M.; Ma, D.; Haines, J. The Impact of COVID-19 on Health Behavior, Stress, Financial and Food Security among Middle to High Income Canadian Families with Young Children. *Nutrients* **2020**, *12* (8), 2352. <https://doi.org/10.3390/nu12082352>.
  37. Caso, D.; Guidetti, M.; Capasso, M.; Cavazza, N. Finally, the Chance to Eat Healthily: Longitudinal Study about Food Consumption during and after the First COVID-19 Lockdown in Italy. *Food Qual Prefer* **2022**, *95*, 104275. <https://doi.org/10.1016/j.foodqual.2021.104275>.
  38. Castellini, G.; Cassioli, E.; Rossi, E.; Innocenti, M.; Gironi, V.; Sanfilippo, G.; Felciai, F.; Monteleone, A. M.; Ricca, V. The Impact of COVID-19 Epidemic on Eating Disorders: A Longitudinal Observation of Pre versus Post Psychopathological Features in a Sample of Patients with Eating Disorders and a Group of Healthy Controls. *International Journal of Eating Disorders* **2020**, *53* (11), 1855–1862. <https://doi.org/10.1002/eat.23368>.
  39. Cecchetto, C.; Aiello, M.; Gentili, C.; Ionta, S.; Osimo, S. A. Increased Emotional Eating during COVID-19 Associated with Lockdown, Psychological and Social Distress. *Appetite* **2021**, *160*, 105122. <https://doi.org/10.1016/j.appet.2021.105122>.
  40. Chan, C. Y.; Chiu, C. Y. Disordered Eating Behaviors and Psychological Health during the COVID-19 Pandemic. *Psychol Health Med* **2022**, *27* (1), 249–256. <https://doi.org/10.1080/13548506.2021.1883687>.

41. Chee, M. J.; Koziel Ly, N. K.; Anisman, H.; Matheson, K. Piece of Cake: Coping with COVID-19. *Nutrients* **2020**, *12* (12), 3803. <https://doi.org/10.3390/nu12123803>.
42. Cheikh Ismail, L.; Osaili, T. M.; Mohamad, M. N.; Al Marzouqi, A.; Jarrar, A. H.; Abu Jamous, D. O.; Magriplis, E.; Ali, H. I.; Al Sabbah, H.; Hasan, H.; AlMarzooqi, L. M. R.; Stojanovska, L.; Hashim, M.; Shaker Obaid, R. R.; Saleh, S. T.; Al Dhaheri, A. S. Eating Habits and Lifestyle during COVID-19 Lockdown in the United Arab Emirates: A Cross-Sectional Study. *Nutrients* **2020**, *12* (11), 3314. <https://doi.org/10.3390/nu12113314>.
43. Cheikh Ismail, L.; Hashim, M.; Mohamad, M. N.; Hassan, H.; Ajab, A.; Stojanovska, L.; Jarrar, A. H.; Hasan, H.; Abu Jamous, D. O.; Saleh, S. T.; Al Daour, R.; Osaili, T. M.; Al Dhaheri, A. S. Dietary Habits and Lifestyle During Coronavirus Pandemic Lockdown: Experience From Lebanon. *Front Nutr* **2021**, *8*. <https://doi.org/10.3389/fnut.2021.730425>.
44. Cheikh Ismail, L.; Osaili, T. M.; Mohamad, M. N.; Al Marzouqi, A.; Jarrar, A. H.; Zampelas, A.; Habib-Mourad, C.; Omar Abu Jamous, D.; Ali, H. I.; Al Sabbah, H.; Hasan, H.; Almarzooqi, L. M. R.; Stojanovska, L.; Hashim, M.; Shaker Obaid, R. R.; Elfeky, S.; Saleh, S. T.; Shawar, Z. A. M.; Al Dhaheri, A. S. Assessment of Eating Habits and Lifestyle during the Coronavirus 2019 Pandemic in the Middle East and North Africa Region: A Cross-Sectional Study. *British Journal of Nutrition* **2021**, *126* (5), 757–766. <https://doi.org/10.1017/S0007114520004547>.
45. Chen, W. L.; Song, S. Y.; Yap, K. H. The Unintended Consequences of the Pandemic: The New Normal for College Students in South Korea and Taiwan. *Front Public Health* **2021**, *9*. <https://doi.org/10.3389/fpubh.2021.598302>.
46. Cherikh, F.; Frey, S.; Bel, C.; Attanasi, G.; Alifano, M.; Iannelli, A. Behavioral Food Addiction During Lockdown: Time for Awareness, Time to Prepare the Aftermath. *Obes Surg* **2020**, *30* (9), 3585–3587. <https://doi.org/10.1007/s11695-020-04649-3>.
47. Christensen, K. A.; Forbush, K. T.; Richson, B. N.; Thomeczek, M. L.; Perko, V. L.; Bjorlie, K.; Christian, K.; Ayres, J.; Wildes, J. E.; Mildrum Chana, S. Food Insecurity Associated with Elevated Eating Disorder Symptoms, Impairment, and Eating Disorder Diagnoses in an American University Student Sample before and during the Beginning of the COVID-19 Pandemic. *International Journal of Eating Disorders* **2021**, *54* (7), 1213–1223. <https://doi.org/10.1002/eat.23517>.
48. Cirillo, M.; Rizzello, F.; Badolato, L.; De Angelis, D.; Evangelisti, P.; Coccia, M. E.; Fatini, C. The Effects of COVID-19 Lockdown on Lifestyle and Emotional State in Women Undergoing Assisted Reproductive Technology: Results of an Italian Survey. *J Gynecol Obstet Hum Reprod* **2021**, *50* (8), 102079. <https://doi.org/10.1016/j.jogoh.2021.102079>.
49. Coakley, K. E.; Le, H.; Silva, S. R.; Wilks, A. Anxiety Is Associated with Appetitive Traits in University Students during the COVID-19 Pandemic. *Nutr J* **2021**, *20* (1), 45. <https://doi.org/10.1186/s12937-021-00701-9>.
50. Constant, A.; Conserve, D. F.; Gallopel-Morvan, K.; Raude, J. Socio-Cognitive Factors Associated With Lifestyle Changes in Response to the COVID-19 Epidemic in the General Population: Results From a Cross-Sectional Study in France. *Front Psychol* **2020**, *11*. <https://doi.org/10.3389/fpsyg.2020.579460>.
51. Cooper, J. A.; vanDellen, M.; Bhutani, S. Self-Weighing Practices and Associated Health Behaviors during COVID-19. *Am J Health Behav* **2021**, *45* (1), 17–30. <https://doi.org/10.5993/AJHB.45.1.2>.
52. Costa, C. dos S.; Steele, E. M.; Leite, M. A.; Rauber, F.; Levy, R. B.; Monteiro, C. A. Mudanças No Peso Corporal Na Coorte NutriNet Brasil Durante a Pandemia de Covid-19. *Rev Saude Publica* **2021**, *55*, 1. <https://doi.org/10.11606/s1518-8787.2021055003457>.
53. Costa, M. L.; Costa, M. G. O.; de Souza, M. F. C.; da Silva, D. G.; Vieira, D. A. dos S.; Mendes-Netto, R. S. Is Physical Activity Protective against Emotional Eating Associated Factors during the COVID-19 Pandemic? A Cross-Sectional Study among Physically Active and Inactive Adults. *Nutrients* **2021**, *13* (11), 3861. <https://doi.org/10.3390/nu13113861>.



54. Coulthard, H.; Sharps, M.; Cunliffe, L.; van den Tol, A. Eating in the Lockdown during the Covid 19 Pandemic; Self-Reported Changes in Eating Behaviour, and Associations with BMI, Eating Style, Coping and Health Anxiety. *Appetite* **2021**, *161*, 105082. <https://doi.org/10.1016/j.appet.2020.105082>.
55. Crucianu, C.; Georgescu, P. L. THE CONSEQUENCES OF COVID-19 PANDEMIC ON DIET AND PHYSICAL ACTIVITY. *Archiv Euromedica* **2021**, *11* (4), 14–16. <https://doi.org/10.35630/2199-885X/2021/11/4.3>.
56. Cummings, J. R.; Ackerman, J. M.; Wolfson, J. A.; Gearhardt, A. N. COVID-19 Stress and Eating and Drinking Behaviors in the United States during the Early Stages of the Pandemic. *Appetite* **2021**, *162*, 105163. <https://doi.org/10.1016/j.appet.2021.105163>.
57. Czepczor-Bernat, K.; Swami, V.; Modrzejewska, A.; Modrzejewska, J. COVID-19-Related Stress and Anxiety, Body Mass Index, Eating Disorder Symptomatology, and Body Image in Women from Poland: A Cluster Analysis Approach. *Nutrients* **2021**, *13* (4), 1384. <https://doi.org/10.3390/nu13041384>.
58. da Rocha, A. Q.; Lobo, P. C. B.; Pimentel, G. D. Muscle Function Loss and Gain of Body Weight during the COVID-19 Pandemic in Elderly Women: Effects of One Year of Lockdown. *J Nutr Health Aging* **2021**, *25* (8), 1028–1029. <https://doi.org/10.1007/s12603-021-1663-x>.
59. De Pasquale, C.; Sciacca, F.; Conti, D.; Pistorio, M. L.; Hichy, Z.; Cardullo, R. L.; Di Nuovo, S. Relations Between Mood States and Eating Behavior During COVID-19 Pandemic in a Sample of Italian College Students. *Front Psychol* **2021**, *12*. <https://doi.org/10.3389/fpsyg.2021.684195>.
60. Deschasaux-Tanguy, M.; Druetne-Pecollo, N.; Esseddik, Y.; de Edelenyi, F. S.; Allès, B.; Andreeva, V. A.; Baudry, J.; Charreire, H.; Deschamps, V.; Egnell, M.; Fezeu, L. K.; Galan, P.; Julia, C.; Kesse-Guyot, E.; Latino-Martel, P.; Oppert, J.-M.; Péneau, S.; Verdot, C.; Hercberg, S.; Touvier, M. Diet and Physical Activity during the Coronavirus Disease 2019 (COVID-19) Lockdown (March–May 2020): Results from the French NutriNet-Santé Cohort Study. *Am J Clin Nutr* **2021**, *113* (4), 924–938. <https://doi.org/10.1093/ajcn/nqaa336>.
61. Di Renzo, L.; Gualtieri, P.; Cinelli, G.; Bigioni, G.; Soldati, L.; Attinà, A.; Bianco, F. F.; Caparello, G.; Camodeca, V.; Carrano, E.; Ferraro, S.; Giannattasio, S.; Leggeri, C.; Rampello, T.; Lo Presti, L.; Tarsitano, M. G.; De Lorenzo, A. Psychological Aspects and Eating Habits during COVID-19 Home Confinement: Results of EHLC-COVID-19 Italian Online Survey. *Nutrients* **2020**, *12* (7), 2152. <https://doi.org/10.3390/nu12072152>.
62. Dicken, S. J.; Mitchell, J. J.; Newberry Le Vay, J.; Beard, E.; Kale, D.; Herbec, A.; Shahab, L. Impact of COVID-19 Pandemic on Weight and BMI among UK Adults: A Longitudinal Analysis of Data from the HEBECO Study. *Nutrients* **2021**, *13* (9), 2911. <https://doi.org/10.3390/nu13092911>.
63. Dobrowolski, H.; Włodarek, D. Body Mass, Physical Activity and Eating Habits Changes during the First COVID-19 Pandemic Lockdown in Poland. *Int J Environ Res Public Health* **2021**, *18* (11), 5682. <https://doi.org/10.3390/ijerph18115682>.
64. Đogaš, Z.; Lušić Kalcina, L.; Pavlinac Dodig, I.; Demirović, S.; Madirazza, K.; Valić, M.; Pecotić, R. The Effect of COVID-19 Lockdown on Lifestyle and Mood in Croatian General Population: A Cross-Sectional Study. *Croat Med J* **2020**, *61* (4), 309–318. <https://doi.org/10.3325/cmj.2020.61.309>.
65. Does, A. R.; Carvalho, I. P.; Burkauskas, J.; Simonato, P.; De Luca, I.; Mooney, R.; Ioannidis, K.; Gómez-Martínez, M. Á.; Demetrovics, Z.; Ábel, K. E.; Szabo, A.; Fujiwara, H.; Shibata, M.; Ventola, A. R. M.; Arroyo-Anlló, E. M.; Santos-Labrador, R. M.; Griskova-Bulanova, I.; Pranckeviciene, A.; Kobayashi, K.; Martinotti, G.; Fineberg, N. A.; Barbosa, F.; Corazza, O. Exercise and Use of Enhancement Drugs at the Time of the COVID-19 Pandemic: A Multicultural Study on Coping Strategies During Self-Isolation and Related Risks. *Front Psychiatry* **2021**, *12*. <https://doi.org/10.3389/fpsyg.2021.648501>.

66. Dor-Haim, H.; Katzburg, S.; Revach, P.; Levine, H.; Barak, S. The Impact of COVID-19 Lockdown on Physical Activity and Weight Gain among Active Adult Population in Israel: A Cross-Sectional Study. *BMC Public Health* **2021**, *21* (1), 1521. <https://doi.org/10.1186/s12889-021-11523-z>.
67. dos Santos Quaresma, M. V.; Marques, C. G.; Magalhães, A. C. O.; dos Santos, R. V. T. Emotional Eating, Binge Eating, Physical Inactivity, and Vespertine Chronotype Are Negative Predictors of Dietary Practices during COVID-19 Social Isolation: A Cross-Sectional Study. *Nutrition* **2021**, *90*, 111223. <https://doi.org/10.1016/j.nut.2021.111223>.
68. Dragun, R.; Veček, N. N.; Marendić, M.; Pribisalić, A.; Đivić, G.; Cena, H.; Polašek, O.; Kolčić, I. Have Lifestyle Habits and Psychological Well-Being Changed among Adolescents and Medical Students Due to COVID-19 Lockdown in Croatia? *Nutrients* **2020**, *13* (1), 97. <https://doi.org/10.3390/nu13010097>.
69. Drieskens, S.; Berger, N.; Vandevijvere, S.; Gisle, L.; Braekman, E.; Charafeddine, R.; De Ridder, K.; Demarest, S. Short-Term Impact of the COVID-19 Confinement Measures on Health Behaviours and Weight Gain among Adults in Belgium. *Archives of Public Health* **2021**, *79* (1), 22. <https://doi.org/10.1186/s13690-021-00542-2>.
70. Drywień, M. E.; Hamulka, J.; Zielinska-Pukos, M. A.; Jeruszka-Bielak, M.; Górnicka, M. The COVID-19 Pandemic Lockdowns and Changes in Body Weight among Polish Women. A Cross-Sectional Online Survey PLifeCOVID-19 Study. *Sustainability* **2020**, *12* (18), 7768. <https://doi.org/10.3390/su12187768>.
71. Du, C.; Adjepong, M.; Zan, M. C. H.; Cho, M. J.; Fenton, J. I.; Hsiao, P. Y.; Keaver, L.; Lee, H.; Ludy, M. J.; Shen, W.; Swee, W. C. S.; Thirivikraman, J.; Amoah-Agyei, F.; de Kanter, E.; Wang, W.; Tucker, R. M. Gender Differences in the Relationships between Perceived Stress, Eating Behaviors, Sleep, Dietary Risk, and Body Mass Index. *Nutrients* **2022**, *14* (5). <https://doi.org/10.3390/nu14051045>.
72. Dun, Y.; Ripley-Gonzalez, J. W.; Zhou, N.; You, B.; Li, Q.; Li, H.; Zhang, W.; Thomas, R. J.; Olson, T. P.; Liu, J.; Dong, Y.; Liu, S. Weight Gain in Chinese Youth during a 4-Month COVID-19 Lockdown: A Retrospective Observational Study. *BMJ Open* **2021**, *11* (7), e052451. <https://doi.org/10.1136/bmjopen-2021-052451>.
73. Ekpanyaskul, C.; Padungtod, C. Occupational Health Problems and Lifestyle Changes Among Novice Working-From-Home Workers Amid the COVID-19 Pandemic. *Saf Health Work* **2021**, *12* (3), 384–389. <https://doi.org/10.1016/j.shaw.2021.01.010>.
74. Elangovan, A.; Eapen, A.; M. Padmapriya, V.; Nagaraj, J.; Kannan, Radhakrishnan; Ravi, M.; Santhakumar, A.; Malathi, M.; Elavarasu, Govindhasamy; A. Merciline, D. Impact of Lockdown Due to Covid-19 on the Lifestyle Changes of Employees in India: A Cross-Sectional Analysis of Personnel Who Work at Office Versus Work from Home. *Asian Journal of Pharmaceutical Research and Health Care* **2020**, *13* (2), 177–186. <https://doi.org/10.18311/ajprhc/2021/27687>.
75. Elmacioğlu, F.; Emiroğlu, E.; Ülker, M. T.; Özyılmaz Kırçali, B.; Oruç, S. Evaluation of Nutritional Behaviour Related to COVID-19. *Public Health Nutr* **2021**, *24* (3), 512–518. <https://doi.org/10.1017/S1368980020004140>.
76. Enriquez-Martinez, O. G.; Martins, M. C. T.; Pereira, T. S. S.; Pacheco, S. O. S.; Pacheco, F. J.; Lopez, K. V.; Huancahuire-Vega, S.; Silva, D. A.; Mora-Urda, A. I.; Rodriguez-Vásquez, M.; Montero López, M. P.; Molina, M. C. B. Diet and Lifestyle Changes During the COVID-19 Pandemic in Ibero-American Countries: Argentina, Brazil, Mexico, Peru, and Spain. *Front Nutr* **2021**, *8*. <https://doi.org/10.3389/fnut.2021.671004>.
77. Flaudias, V.; Iceta, S.; Zerhouni, O.; Rodgers, R. F.; Billieux, J.; Llorca, P.-M.; Boudesseul, J.; de Chazeron, I.; Romo, L.; Maurage, P.; Samalin, L.; Bègue, L.; Naassila, M.; Brousse, G.; Guillaume, S. COVID-19 Pandemic Lockdown and Problematic Eating Behaviors in a Student Population. *J Behav Addict* **2020**, *9* (3), 826–835. <https://doi.org/10.1556/2006.2020.00053>.

78. Freitas, F. da F.; de Medeiros, A. C. Q.; Lopes, F. de A. Effects of Social Distancing During the COVID-19 Pandemic on Anxiety and Eating Behavior—A Longitudinal Study. *Front Psychol* **2021**, *12*. <https://doi.org/10.3389/fpsyg.2021.645754>.
79. Gao, Y.; Ao, H.; Hu, X.; Wang, X.; Huang, D.; Huang, W.; Han, Y.; Zhou, C.; He, L.; Lei, X.; Gao, X. Social Media Exposure during COVID-19 Lockdowns Could Lead to Emotional Overeating via Anxiety: The Moderating Role of Neuroticism. *Appl Psychol Health Well Being* **2022**, *14* (1), 64–80. <https://doi.org/10.1111/aphw.12291>.
80. Grant, F.; Scalvedi, M. L.; Scognamiglio, U.; Turrini, A.; Rossi, L. Eating Habits during the COVID-19 Lockdown in Italy: The Nutritional and Lifestyle Side Effects of the Pandemic. *Nutrients* **2021**, *13* (7), 2279. <https://doi.org/10.3390/nu13072279>.
81. Guerrini Usubini, A.; Cattivelli, R.; Varallo, G.; Castelnuovo, G.; Molinari, E.; Giusti, E. M.; Pietrabissa, G.; Manari, T.; Filosa, M.; Franceschini, C.; Musetti, A. The Relationship between Psychological Distress during the Second Wave Lockdown of COVID-19 and Emotional Eating in Italian Young Adults: The Mediating Role of Emotional Dysregulation. *J Pers Med* **2021**, *11* (6), 569. <https://doi.org/10.3390/jpm11060569>.
82. Jackson, A. M.; Weaver, R. H.; Iniguez, A.; Lanigan, J. A Lifespan Perspective of Structural and Perceived Social Relationships, Food Insecurity, and Dietary Behaviors during the COVID-19 Pandemic. *Appetite* **2022**, *168*, 105717. <https://doi.org/10.1016/j.appet.2021.105717>.
83. Jackson, A.; Anderson, A.; Weybright, E.; Lanigan, J. Differing Experiences of Boredom During the Pandemic and Associations With Dietary Behaviors. *J Nutr Educ Behav* **2021**, *53* (8), 706–711. <https://doi.org/10.1016/j.jneb.2021.04.005>.
84. Jordan, A. K.; Barnhart, W. R.; Studer-Perez, E. I.; Kalantzis, M. A.; Hamilton, L.; Musher-Eizenman, D. R. ‘Quarantine 15’: Pre-Registered Findings on Stress and Concern about Weight Gain before/during COVID-19 in Relation to Caregivers’ Eating Pathology. *Appetite* **2021**, *166*, 105580. <https://doi.org/10.1016/j.appet.2021.105580>.
85. Karakose, T.; Yirci, R.; Basyigit, H.; Kucukcakir, A. Investigation of Associations between the Effects of COVID-19 Fear on School Administrators and Nutrition and Problematic Eating Behaviors. *Progress in Nutrition* **2021**, *23* (2), e2021187–e2021187. <https://doi.org/10.23751/pn.v23i2.11656>.
86. Kaufman-Shriqui, V.; Navarro, D. A.; Raz, O.; Boaz, M. Dietary Changes and Anxiety during the Coronavirus Pandemic: A Multinational Survey. *Eur J Clin Nutr* **2022**, *76* (1), 84–92. <https://doi.org/10.1038/s41430-021-00897-3>.
87. Kesilmiş, İ.; Yilmaz, O.; Çelik, D. Ö. EFFECT OF COVID-19 ON AMATEUR FOOTBALL: PERSPECTIVE OF PHYSICAL ACTIVITY, NUTRITION, AND MOOD. *Int J Life Sci Pharma Res* **2021**, 156–163.
88. Khubchandani, J.; Kandiah, J.; Saiki, D. The COVID-19 Pandemic, Stress, and Eating Practices in the United States. *Eur J Investig Health Psychol Educ* **2020**, *10* (4), 950–956. <https://doi.org/10.3390/ejihpe10040067>.
89. Landaeta-Díaz, L.; González-Medina, G.; Agüero, S. D. Anxiety, Anhedonia and Food Consumption during the COVID-19 Quarantine in Chile. *Appetite* **2021**, *164*, 105259. <https://doi.org/10.1016/j.appet.2021.105259>.
90. León-Paucar, S. D.; Calderón-Olivos, B. C.; Calizaya-Milla, Y. E.; Saintila, J. Depression, Dietary Intake, and Body Image during Coronavirus Disease 2019 Quarantine in Peru: An Online Cross-Sectional Study. *SAGE Open Med* **2021**, *9*, 205031212110519. <https://doi.org/10.1177/20503121211051914>.
91. Liboredo, J. C.; Anastácio, L. R.; Ferreira, L. G.; Oliveira, L. A.; Della Lucia, C. M. Quarantine During COVID-19 Outbreak: Eating Behavior, Perceived Stress, and Their Independently Associated Factors in a Brazilian Sample. *Front Nutr* **2021**, *8*. <https://doi.org/10.3389/fnut.2021.704619>.
92. Li, X.; Li, J.; Qing, P.; Hu, W. COVID-19 and the Change in Lifestyle: Bodyweight, Time Allocation, and Food Choices. *Int J Environ Res Public Health* **2021**, *18* (19), 10552. <https://doi.org/10.3390/ijerph181910552>.

93. Lofrano-Prado, M. C.; do Prado, W. L.; Botero, J. P.; Cardel, M. L.; Farah, B. Q.; Oliveira, M. D.; Cucato, G. G.; Correia, M. A.; Ritti-Dias, R. M. The Same Storm but Not the Same Boat: Effects of COVID-19 Stay-at-home Order on Mental Health in Individuals with Overweight. *Clin Obes* **2021**, *11* (1). <https://doi.org/10.1111/cob.12425>.
94. Ma, L.; Gao, L. W.; Lau, J. T.; Rahman, A.; Johnson, B. T.; Yan, A. F.; Shi, Z. M.; Ding, Y. X.; Nie, P.; Zheng, J. G.; Wang, Y. F.; Wang, W. D.; Xue, Q. L. Mental Distress and Its Associations with Behavioral Outcomes during the COVID-19 Pandemic: A National Survey of Chinese Adults. *Public Health* **2021**, *198*, 315–323. <https://doi.org/10.1016/j.puhe.2021.07.034>.
95. Madalı, B.; Alkan, Ş. B.; Örs, E. D.; Ayrancı, M.; Taşkın, H.; Kara, H. H. Emotional Eating Behaviors during the COVID-19 Pandemic: A Cross-Sectional Study. *Clin Nutr ESPEN* **2021**, *46*, 264–270. <https://doi.org/10.1016/j.clnesp.2021.09.745>.
96. Madan, J.; Blonquist, T.; Rao, E.; Marwaha, A.; Mehra, J.; Bharti, R.; Sharma, N.; Samaddar, R.; Pandey, S.; Mah, E.; Shete, V.; Chu, Y.; Chen, O. Effect of COVID-19 Pandemic-Induced Dietary and Lifestyle Changes and Their Associations with Perceived Health Status and Self-Reported Body Weight Changes in India: A Cross-Sectional Survey. *Nutrients* **2021**, *13* (11), 3682. <https://doi.org/10.3390/nu13113682>.
97. Maffoni, S.; Brazzo, S.; De Giuseppe, R.; Biino, G.; Vietti, I.; Pallavicini, C.; Cena, H. Lifestyle Changes and Body Mass Index during COVID-19 Pandemic Lockdown: An Italian Online-Survey. *Nutrients* **2021**, *13* (4), 1117. <https://doi.org/10.3390/nu13041117>.
98. Mahar, B.; Warsi, J.; Shah, T. Eating Disorders and Eating Pattern During Covid-19 Pandemic: A Short Bulletin. *Journal of Liaquat University of Medical & Health Sciences* **2021**, *20* (02), 157–162. <https://doi.org/10.22442/jlumhs.2021.00776>.
99. Malkawi, S. H.; Almhdawi, K.; Jaber, A. F.; Alqatarneh, N. S. COVID-19 Quarantine-Related Mental Health Symptoms and Their Correlates among Mothers: A Cross Sectional Study. *Matern Child Health J* **2021**, *25* (5), 695–705. <https://doi.org/10.1007/s10995-020-03034-x>.
100. Martínez-de-Quel, Ó.; Suárez-Iglesias, D.; López-Flores, M.; Pérez, C. A. Physical Activity, Dietary Habits and Sleep Quality before and during COVID-19 Lockdown: A Longitudinal Study. *Appetite* **2021**, *158*, 105019. <https://doi.org/10.1016/j.appet.2020.105019>.
101. Mason, T. B.; Barrington-Trimis, J.; Leventhal, A. M. Eating to Cope With the COVID-19 Pandemic and Body Weight Change in Young Adults. *Journal of Adolescent Health* **2021**, *68* (2), 277–283. <https://doi.org/10.1016/j.jadohealth.2020.11.011>.
102. Mazzolani, B. C.; Smaira, F. I.; Esteves, G. P.; Santo André, H. C.; Amarante, M. C.; Castanho, D.; Campos, K.; Benatti, F. B.; Pinto, A. J.; Roschel, H.; Gualano, B.; Nicoletti, C. F. Influence of Body Mass Index on Eating Habits and Food Choice Determinants Among Brazilian Women During the COVID-19 Pandemic. *Front Nutr* **2021**, *8*. <https://doi.org/10.3389/fnut.2021.664240>.
103. McAtamney, K.; Mantzios, M.; Egan, H.; Wallis, D. J. Emotional Eating during COVID-19 in the United Kingdom: Exploring the Roles of Alexithymia and Emotion Dysregulation. *Appetite* **2021**, *161*, 105120. <https://doi.org/10.1016/j.appet.2021.105120>.
104. Micheletti Cremasco, M.; Mulasso, A.; Moroni, A.; Testa, A.; Degan, R.; Rainoldi, A.; Rabaglietti, E. Relation among Perceived Weight Change, Sedentary Activities and Sleep Quality during COVID-19 Lockdown: A Study in an Academic Community in Northern Italy. *Int J Environ Res Public Health* **2021**, *18* (6), 2943. <https://doi.org/10.3390/ijerph18062943>.
105. Molina-Montes, E.; Uzhova, I.; Verardo, V.; Artacho, R.; García-Villanova, B.; Jesús Guerra-Hernández, E.; Kapsokefalou, M.; Malisova, O.; Vlassopoulos, A.; Katidi, A.; Koroušić Seljak, B.; Modic, R.; Eftimov, T.; Hren, I.; Valenčič, E.; Šatalić, Z.; Panjkota Krbavčič, I.; Vranešić Bender, D.; Giacalone, D.; Bom Frøst, M.; Konic Ristic, A.; Milesevic, J.; Nikolic, M.; Kolay, E.; Güney, M.; Kriaucioniene, V.; Czlapka-Matyasik, M.; Bykowska-Derda, A.; Kujundzic, E.; Taljić, I.; Brka, M.; Spiroski, I.; Cunha Velho, S.; Patrícia Sousa Pinto, S.; Nascimento Monteiro, I.; Adriana Pereira, J.; Dolores Ruiz-López, M.; Rodríguez-Pérez, C. Impact of COVID-19 Confinement on Eating Behaviours

- across 16 European Countries: The COVIDiet Cross-National Study. *Food Qual Prefer* **2021**, *93*, 104231. <https://doi.org/10.1016/j.foodqual.2021.104231>.
106. Mota, I. A.; Oliveira Sobrinho, G. D. de; Morais, I. P. S.; Dantas, T. F. Impact of COVID-19 on Eating Habits, Physical Activity and Sleep in Brazilian Healthcare Professionals. *Arq Neuropsiquiatr* **2021**, *79* (5), 429–436. <https://doi.org/10.1590/0004-282x-anp-2020-0482>.
  107. Mulugeta, W.; Desalegn, H.; Solomon, S. Impact of the <sc>COVID</Sc> -19 Pandemic Lockdown on Weight Status and Factors Associated with Weight Gain among Adults in Massachusetts. *Clin Obes* **2021**, *11* (4). <https://doi.org/10.1111/cob.12453>.
  108. Mumena, W. Impact of COVID-19 Curfew on Eating Habits, Eating Frequency, and Weight According to Food Security Status in Saudi Arabia: A Retrospective Study. *Progress in Nutrition* **2020**, *22*, 1–9.
  109. Nitu, I.; Rus, V. A.; Sipos, R. S.; Nyulas, T.; Cherhat, M. P.; Ruta, F.; Tita, C. C. N. Assessment of Eating Behavior During the COVID-19 Pandemic Period. A Pilot Study. *Journal of Interdisciplinary Medicine* **2021**, *6* (2), 67–73. <https://doi.org/10.2478/jim-2021-0024>.
  110. Özcan, B.; Yeşilkaya, B. Adverse Effect of Emotional Eating Developed During the COVID-19 Pandemic on Healthy Nutrition, a Vicious Circle: A Cross-Sectional Descriptive Study. *Revista Española de Nutrición Humana y Dietética* **2021**, *25*, e1144. <https://doi.org/10.14306/renhyd.25.S2.1144>.
  111. Özden, G.; Parlar Kiliç, S. The Effect of Social Isolation during COVID-19 Pandemic on Nutrition and Exercise Behaviors of Nursing Students. *Ecol Food Nutr* **2021**, *60* (6), 663–681. <https://doi.org/10.1080/03670244.2021.1875456>.
  112. Özen, G.; Eskici, G.; Yurdakul, H. Ö.; Koç, H. Assessment of the Impact of COVID-19 Pandemic on Emotional and Nutritional Status of University Athletes. *Physical education of students* **2021**, *25* (1), 43–50. <https://doi.org/10.15561/20755279.2021.0106>.
  113. Özenoğlu, A.; Çevik, E.; Çolak, H.; Altıntaş, T.; Alakuş, K. Changes in Nutrition and Lifestyle Habits during the COVID-19 Pandemic in Turkey and the Effects of Healthy Eating Attitudes. *Med J Nutrition Metab* **2021**, *14* (3), 325–341. <https://doi.org/10.3233/MNM-210562>.
  114. Pak, H.; Süsen, Y.; Denizci Nazlıgül, M.; Griffiths, M. The Mediating Effects of Fear of COVID-19 and Depression on the Association Between Intolerance of Uncertainty and Emotional Eating During the COVID-19 Pandemic in Turkey. *Int J Ment Health Addict* **2022**, *20* (3), 1882–1896. <https://doi.org/10.1007/s11469-021-00489-z>.
  115. Palmer, K.; Bscheiden, A.; Stroebele-Benschop, N. Changes in Lifestyle, Diet, and Body Weight during the First COVID 19 ‘Lockdown’ in a Student Sample. *Appetite* **2021**, *167*, 105638. <https://doi.org/10.1016/j.appet.2021.105638>.
  116. Pappa, S.; Barnett, J.; Berges, I.; Sakkas, N. Tired, Worried and Burned Out, but Still Resilient: A Cross-Sectional Study of Mental Health Workers in the UK during the COVID-19 Pandemic. *Int J Environ Res Public Health* **2021**, *18* (9), 4457. <https://doi.org/10.3390/ijerph18094457>.
  117. Pertuz-Cruz, S. L.; Molina-Montes, E.; Rodríguez-Pérez, C.; Guerra-Hernández, E. J.; Cobos de Rangel, O. P.; Artacho, R.; Verardo, V.; Ruiz-Lopez, M. D.; García-Villanova, B. Exploring Dietary Behavior Changes Due to the COVID-19 Confinement in Colombia: A National and Regional Survey Study. *Front Nutr* **2021**, *8*. <https://doi.org/10.3389/fnut.2021.644800>.
  118. Phillipou, A.; Meyer, D.; Neill, E.; Tan, E. J.; Toh, W. L.; Van Rheenen, T. E.; Rossell, S. L. Eating and Exercise Behaviors in Eating Disorders and the General Population during the <sc>COVID</Sc> -19 Pandemic in Australia: Initial Results from the <sc>COLLATE</Sc> Project. *International Journal of Eating Disorders* **2020**, *53* (7), 1158–1165. <https://doi.org/10.1002/eat.23317>.
  119. Phillipou, A.; Tan, E. J.; Toh, W. L.; Van Rheenen, T. E.; Meyer, D.; Neill, E.; Sumner, P.; Rossell, S. L. Mental Health of Individuals with and without Eating Disorders across Six Months and

- Two Waves of COVID-19. *Eat Behav* **2021**, *43*, 101564.  
<https://doi.org/10.1016/j.eatbeh.2021.101564>.
120. Pirutinsky, S.; Cherniak, A. D.; Rosmarin, D. H. COVID-19, Religious Coping, and Weight Change in the Orthodox Jewish Community. *J Relig Health* **2021**, *60* (2), 646–653.  
<https://doi.org/10.1007/s10943-021-01196-8>.
  121. Pišot, S.; Milovanović, I.; Šimunič, B.; Gentile, A.; Bosnar, K.; Prot, F.; Bianco, A.; Lo Coco, G.; Bartoluci, S.; Katović, D.; Bakalár, P.; Kovalik Slančová, T.; Tlučáková, L.; Casals, C.; Feka, K.; Christogianni, A.; Drid, P. Maintaining Everyday Life Praxis in the Time of COVID-19 Pandemic Measures (ELP-COVID-19 Survey). *Eur J Public Health* **2020**, *30* (6), 1181–1186.  
<https://doi.org/10.1093/eurpub/ckaa157>.
  122. Poelman, M. P.; Gillebaart, M.; Schlinkert, C.; Dijkstra, S. C.; Derksen, E.; Mensink, F.; Hermans, R. C. J.; Aardening, P.; de Ridder, D.; de Vet, E. Eating Behavior and Food Purchases during the COVID-19 Lockdown: A Cross-Sectional Study among Adults in the Netherlands. *Appetite* **2021**, *157*, 105002. <https://doi.org/10.1016/j.appet.2020.105002>.
  123. Pompili, S.; Di Tata, D.; Bianchi, D.; Lonigro, A.; Zammuto, M.; Baiocco, R.; Longobardi, E.; Laghi, F. Food and Alcohol Disturbance among Young Adults during the COVID-19 Lockdown in Italy: Risk and Protective Factors. *Eating and Weight Disorders - Studies on Anorexia, Bulimia and Obesity* **2022**, *27* (2), 769–780. <https://doi.org/10.1007/s40519-021-01220-6>.
  124. Pop, C.; Ciomag, V. Impact of COVID-19 Lockdown on Body Mass Index in Young Adults. *Physical education of students* **2021**, *25* (2), 98–102.  
<https://doi.org/10.15561/20755279.2021.0204>.
  125. Prezotti, J. A.; Henriques, J. V. T.; Favorito, L. A.; Canalini, A. F.; Machado, M. G.; Brandão, T. B. V.; Barbosa, A. M. V.; Moromizato, J. K. M.; Anzolch, K. M. J.; Fernandes, R. de C.; Rodrigues, F. R. A.; Bellucci, C. H. S.; Silva, C. S.; Pompeo, A. C. L.; Bessa Jr., J. de; Gomes, C. M. Impact of COVID-19 on Education, Health and Lifestyle Behaviour of Brazilian Urology Residents. *International braz j urol* **2021**, *47* (4), 753–776. <https://doi.org/10.1590/s1677-5538.ibju.2021.99.09>.
  126. Puhl, R. M.; Lessard, L. M.; Larson, N.; Eisenberg, M. E.; Neumark-Stzainer, D. Weight Stigma as a Predictor of Distress and Maladaptive Eating Behaviors During COVID-19: Longitudinal Findings From the EAT Study. *Annals of Behavioral Medicine* **2020**, *54* (10), 738–746.  
<https://doi.org/10.1093/abm/kaaa077>.
  127. Queiroz, F. L. N. de; Nakano, E. Y.; Botelho, R. B. A.; Ginani, V. C.; Raposo, A.; Zandonadi, R. P. Eating Competence among Brazilian Adults: A Comparison between before and during the COVID-19 Pandemic. *Foods* **2021**, *10* (9), 2001. <https://doi.org/10.3390/foods10092001>.
  128. Radwan, H.; Al Kitbi, M.; Hasan, H.; Al Hilali, M.; Abbas, N.; Hamadeh, R.; Saif, E. R.; Naja, F. Indirect Health Effects of COVID-19: Unhealthy Lifestyle Behaviors during the Lockdown in the United Arab Emirates. *Int J Environ Res Public Health* **2021**, *18* (4), 1964.  
<https://doi.org/10.3390/ijerph18041964>.
  129. Ramalho, S. M.; Trovisqueira, A.; de Lourdes, M.; Gonçalves, S.; Ribeiro, I.; Vaz, A. R.; Machado, P. P. P.; Conceição, E. The Impact of COVID-19 Lockdown on Disordered Eating Behaviors: The Mediation Role of Psychological Distress. *Eating and Weight Disorders - Studies on Anorexia, Bulimia and Obesity* **2022**, *27* (1), 179–188. <https://doi.org/10.1007/s40519-021-01128-1>.
  130. Reyes-Olavarría, D.; Latorre-Román, P. Á.; Guzmán-Guzmán, I. P.; Jerez-Mayorga, D.; Caamaño-Navarrete, F.; Delgado-Floody, P. Positive and Negative Changes in Food Habits, Physical Activity Patterns, and Weight Status during COVID-19 Confinement: Associated Factors in the Chilean Population. *Int J Environ Res Public Health* **2020**, *17* (15), 5431.  
<https://doi.org/10.3390/ijerph17155431>.
  131. Robertson, M.; Duffy, F.; Newman, E.; Prieto Bravo, C.; Ates, H. H.; Sharpe, H. Exploring Changes in Body Image, Eating and Exercise during the COVID-19 Lockdown: A UK Survey. *Appetite* **2021**, *159*, 105062. <https://doi.org/10.1016/j.appet.2020.105062>.

132. Robinson, E.; Daly, M. Explaining the Rise and Fall of Psychological Distress during the COVID-19 Crisis in the United States: Longitudinal Evidence from the Understanding America Study. *Br J Health Psychol* **2021**, *26* (2), 570–587. <https://doi.org/10.1111/bjhp.12493>.
133. Robinson, E.; Gillespie, S.; Jones, A. Weight-related Lifestyle Behaviours and the COVID-19 Crisis: An Online Survey Study of UK Adults during Social Lockdown. *Obes Sci Pract* **2020**, *6* (6), 735–740. <https://doi.org/10.1002/osp4.442>.
134. Rodríguez-Pérez, C.; Molina-Montes, E.; Verardo, V.; Artacho, R.; García-Villanova, B.; Guerra-Hernández, E. J.; Ruíz-López, M. D. Changes in Dietary Behaviours during the COVID-19 Outbreak Confinement in the Spanish COVIDiet Study. *Nutrients* **2020**, *12* (6), 1730. <https://doi.org/10.3390/nu12061730>.
135. Rogers, A. M.; Lauren, B. N.; Woo Baidal, J. A.; Ozanne, E. M.; Hur, C. Persistent Effects of the COVID-19 Pandemic on Diet, Exercise, Risk for Food Insecurity, and Quality of Life: A Longitudinal Study among U.S. Adults. *Appetite* **2021**, *167*, 105639. <https://doi.org/10.1016/j.appet.2021.105639>.
136. Ruiz-Zaldibar, C.; García-Garcés, L.; Vicario-Merino, Á.; Mayoral-Gonzalo, N.; Lluesma-Vidal, M.; Ruiz-López, M.; Pérez-Manchón, D. The Impact of COVID-19 on the Lifestyles of University Students: A Spanish Online Survey. *Healthcare* **2022**, *10* (2), 309. <https://doi.org/10.3390/healthcare10020309>.
137. Ruiz, M. C.; Devonport, T. J.; Chen-Wilson, C.-H. (Josephine); Nicholls, W.; Cagas, J. Y.; Fernandez-Montalvo, J.; Choi, Y.; Robazza, C. A Cross-Cultural Exploratory Study of Health Behaviors and Wellbeing During COVID-19. *Front Psychol* **2021**, *11*. <https://doi.org/10.3389/fpsyg.2020.608216>.
138. Sadler, J. R.; Thapaliya, G.; Jansen, E.; Aghababian, A. H.; Smith, K. R.; Carnell, S. COVID-19 Stress and Food Intake: Protective and Risk Factors for Stress-Related Palatable Food Intake in U.S. Adults. *Nutrients* **2021**, *13* (3), 901. <https://doi.org/10.3390/nu13030901>.
139. Sánchez, E.; Lecube, A.; Bellido, D.; Monereo, S.; Malagón, M.; Tinahones, F. Leading Factors for Weight Gain during COVID-19 Lockdown in a Spanish Population: A Cross-Sectional Study. *Nutrients* **2021**, *13* (3), 894. <https://doi.org/10.3390/nu13030894>.
140. Sánchez-Sánchez, E.; Ramírez-Vargas, G.; Avellaneda-López, Y.; Orellana-Pecino, J. I.; García-Marín, E.; Díaz-Jimenez, J. Eating Habits and Physical Activity of the Spanish Population during the COVID-19 Pandemic Period. *Nutrients* **2020**, *12* (9), 2826. <https://doi.org/10.3390/nu12092826>.
141. Sánchez-Sánchez, E.; Díaz-Jimenez, J.; Rosety, I.; Alférez, M. J. M.; Díaz, A. J.; Rosety, M. A.; Ordonez, F. J.; Rosety-Rodriguez, M. Perceived Stress and Increased Food Consumption during the 'Third Wave' of the COVID-19 Pandemic in Spain. *Nutrients* **2021**, *13* (7), 2380. <https://doi.org/10.3390/nu13072380>.
142. Santana, J. da M.; Milagres, M. P.; Silva dos Santos, C.; Brazil, J. M.; Lima, E. R.; Pereira, M. Dietary Intake of University Students during COVID-19 Social Distancing in the Northeast of Brazil and Associated Factors. *Appetite* **2021**, *162*, 105172. <https://doi.org/10.1016/j.appet.2021.105172>.
143. Sarda, B.; Delamaire, C.; Serry, A.-J.; Ducrot, P. Changes in Home Cooking and Culinary Practices among the French Population during the COVID-19 Lockdown. *Appetite* **2022**, *168*, 105743. <https://doi.org/10.1016/j.appet.2021.105743>.
144. Saxena, R.; Parmar, N.; Kaur, P.; Allen, T. Effect of Screen-Time on Sleep Pattern and Dietary Habits among College-Going Students in COVID-19 Pandemic. *Indian J Community Health* **2021**, *33* (1), 65–74. <https://doi.org/10.47203/IJCH.2021.v33i01.009>.
145. Scacchi, A.; Catozzi, D.; Boietti, E.; Bert, F.; Siliquini, R. COVID-19 Lockdown and Self-Perceived Changes of Food Choice, Waste, Impulse Buying and Their Determinants in Italy: QuarantEat, a Cross-Sectional Study. *Foods* **2021**, *10* (2), 306. <https://doi.org/10.3390/foods10020306>.

146. Scarmozzino, F.; Visioli, F. Covid-19 and the Subsequent Lockdown Modified Dietary Habits of Almost Half the Population in an Italian Sample. *Foods* **2020**, *9* (5), 675. <https://doi.org/10.3390/foods9050675>.
147. Scharmer, C.; Martinez, K.; Gorrell, S.; Reilly, E. E.; Donahue, J. M.; Anderson, D. A. Eating Disorder Pathology and Compulsive Exercise during the <scp>COVID</Scp> -19 Public Health Emergency: Examining Risk Associated with <scp>COVID</Scp> -19 Anxiety and Intolerance of Uncertainty. *International Journal of Eating Disorders* **2020**, *53* (12), 2049–2054. <https://doi.org/10.1002/eat.23395>.
148. Schulte, E. M.; Kral, T. V. E.; Allison, K. C. A Cross-Sectional Examination of Reported Changes to Weight, Eating, and Activity Behaviors during the COVID-19 Pandemic among United States Adults with Food Addiction. *Appetite* **2022**, *168*, 105740. <https://doi.org/10.1016/j.appet.2021.105740>.
149. Seal, A.; Schaffner, A.; Phelan, S.; Brunner-Gaydos, H.; Tseng, M.; Keadle, S.; Alber, J.; Kiteck, I.; Hagobian, T. COVID-19 Pandemic and Stay-at-home Mandates Promote Weight Gain in US Adults. *Obesity* **2022**, *30* (1), 240–248. <https://doi.org/10.1002/oby.23293>.
150. Sebastião, E.; Steffens, M.; Nakamura, P. M.; Papini, C. B. Perceptions on Activity Behavior during the COVID-19 Pandemic “Second Wave” among US Adults: Results of a Short Online Survey. *Sport Sci Health* **2022**, *18* (1), 267–275. <https://doi.org/10.1007/s11332-021-00813-z>.
151. Serin, E.; Can Koç, M. Examination of the Eating Behaviours and Depression States of the University Students Who Stay at Home during the Coronavirus Pandemic in Terms of Different Variables. *Progress in Nutrition* **2020**, *22*, 33–43.
152. Shaun, M. M. A.; Nizum, M. W. R.; Munny, S.; Fayeza, F.; Mali, S. K.; Abid, M. T.; Hasan, A.-R. Eating Habits and Lifestyle Changes among Higher Studies Students Post-Lockdown in Bangladesh: A Web-Based Cross-Sectional Study. *Heliyon* **2021**, *7* (8), e07843. <https://doi.org/10.1016/j.heliyon.2021.e07843>.
153. Shibata, M.; Burkauskas, J.; Dores, A. R.; Kobayashi, K.; Yoshimura, S.; Simonato, P.; De Luca, I.; Cicconcelli, D.; Giorgetti, V.; Carvalho, I. P.; Barbosa, F.; Monteiro, C.; Murai, T.; Gómez-Martínez, M. A.; Demetrovics, Z.; Ábel, K. E.; Szabo, A.; Ventola, A. R. M.; Arroyo-Anlló, E. M.; Santos-Labrador, R. M.; Griskova-Bulanova, I.; Pranckeviciene, A.; Bersani, G.; Fujiwara, H.; Corazza, O. Exploring the Relationship Between Mental Well-Being, Exercise Routines, and the Intake of Image and Performance Enhancing Drugs During the Coronavirus Disease 2019 Pandemic: A Comparison Across Sport Disciplines. *Front Psychol* **2021**, *12*. <https://doi.org/10.3389/fpsyg.2021.689058>.
154. Shin, E. Pandemic Fear and Weight Gain: Effects on Overweight and Obese Adults’ Purchasing Exercise Apparel Online. *Clothing and Textiles Research Journal* **2021**, *39* (3), 232–246. <https://doi.org/10.1177/0887302X211004892>.
155. Sidor, A.; Rzymiski, P. Dietary Choices and Habits during COVID-19 Lockdown: Experience from Poland. *Nutrients* **2020**, *12* (6), 1657. <https://doi.org/10.3390/nu12061657>.
156. Silva, M. N.; Gregório, M. J.; Santos, R.; Marques, A.; Rodrigues, B.; Godinho, C.; Silva, C. S.; Mendes, R.; Graça, P.; Arriaga, M.; Freitas, G. Towards an In-Depth Understanding of Physical Activity and Eating Behaviours during COVID-19 Social Confinement: A Combined Approach from a Portuguese National Survey. *Nutrients* **2021**, *13* (8), 2685. <https://doi.org/10.3390/nu13082685>.
157. Silverman, J. R.; Wang, B. Z. Impact of School Closures, Precipitated by COVID-19, on Weight and Weight-Related Risk Factors among Schoolteachers: A Cross-Sectional Study. *Nutrients* **2021**, *13* (8), 2723. <https://doi.org/10.3390/nu13082723>.
158. Skotnicka, M.; Karwowska, K.; Kłobukowski, F.; Wasilewska, E.; Małgorzewicz, S. Dietary Habits before and during the COVID-19 Epidemic in Selected European Countries. *Nutrients* **2021**, *13* (5), 1690. <https://doi.org/10.3390/nu13051690>.



159. Smith, K. R.; Jansen, E.; Thapaliya, G.; Aghababian, A. H.; Chen, L.; Sadler, J. R.; Carnell, S. The Influence of COVID-19-Related Stress on Food Motivation. *Appetite* **2021**, *163*, 105233. <https://doi.org/10.1016/j.appet.2021.105233>.
160. Sobba, W.; Landry, M. J.; Cunanan, K. M.; Marcone, A.; Gardner, C. D. Changes in Ultra-Processed Food Consumption and Lifestyle Behaviors Following COVID-19 Shelter-in-Place: A Retrospective Study. *Foods* **2021**, *10* (11), 2553. <https://doi.org/10.3390/foods10112553>.
161. Solé, B.; Verdolini, N.; Amoretti, S.; Montejo, L.; Rosa, A. R.; Hogg, B.; Garcia-Rizo, C.; Mezquida, G.; Bernardo, M.; Martinez-Aran, A.; Vieta, E.; Torrent, C. Effects of the COVID-19 Pandemic and Lockdown in Spain: Comparison between Community Controls and Patients with a Psychiatric Disorder. Preliminary Results from the BRIS-MHC STUDY. *J Affect Disord* **2021**, *281*, 13–23. <https://doi.org/10.1016/j.jad.2020.11.099>.
162. Suka, M.; Yamauchi, T.; Yanagisawa, H. Changes in Health Status, Workload, and Lifestyle after Starting the COVID-19 Pandemic: A Web-Based Survey of Japanese Men and Women. *Environ Health Prev Med* **2021**, *26* (1), 37. <https://doi.org/10.1186/s12199-021-00957-x>.
163. Sulejmani, E.; Hyseni, A.; Xhabiri, G.; Rodríguez-Pérez, C. Relationship in Dietary Habits Variations during COVID-19 Lockdown in Kosovo: The COVIDiet Study. *Appetite* **2021**, *164*, 105244. <https://doi.org/10.1016/j.appet.2021.105244>.
164. Swami, V.; Horne, G.; Furnham, A. COVID-19-Related Stress and Anxiety Are Associated with Negative Body Image in Adults from the United Kingdom. *Pers Individ Dif* **2021**, *170*, 110426. <https://doi.org/10.1016/j.paid.2020.110426>.
165. Tabler, J.; Schmitz, R. M.; Charak, R.; Dickinson, E. Perceived Weight Gain and Eating Disorder Symptoms among LGBTQ+ Adults during the COVID-19 Pandemic: A Convergent Mixed-Method Study. *J Eat Disord* **2021**, *9* (1), 115. <https://doi.org/10.1186/s40337-021-00470-0>.
166. Tan, S. T.; Tan, C. X.; Tan, S. S. Trajectories of Food Choice Motives and Weight Status of Malaysian Youths during the COVID-19 Pandemic. *Nutrients* **2021**, *13* (11), 3752. <https://doi.org/10.3390/nu13113752>.
167. Tifha, M.; Abbes, W.; Dhemaïd, M.; Mdhaïffar, K.; Abbes, M.; Zitoun, K.; Ghanmi, L. Binge Eating Disorder Experienced by Young Doctors Struggling with COVID-19. *European Psychiatry* **2021**, *64* (S1), S285–S286. <https://doi.org/10.1192/j.eurpsy.2021.765>.
168. Thahir, A.; Sulastri, S.; Zahra Bulantika, S.; Novita, T. Gender Differences on COVID-19 Related Anxiety Among Students. *Pakistan Journal of Psychological Research* **2021**, *36* (1), 71–83. <https://doi.org/10.33824/PJPR.2021.36.1.05>.
169. Trott, M.; Johnstone, J.; Pardhan, S.; Barnett, Y.; Smith, L. Changes in Body Dysmorphic Disorder, Eating Disorder, and Exercise Addiction Symptomology during the COVID-19 Pandemic: A Longitudinal Study of 319 Health Club Users. *Psychiatry Res* **2021**, *298*, 113831. <https://doi.org/10.1016/j.psychres.2021.113831>.
170. Turgut, M.; Soylu, Y.; Metin, S. N. Physical Activity, Night Eating, and Mood State Profiles of Athletes during the COVID-19 Pandemic. *Progress in Nutrition* **2020**, *22*, e2020019.
171. Urzeala, C.; Duclos, M.; Chris Ugbole, U.; Bota, A.; Berthon, M.; Kulik, K.; Thivel, D.; Bagheri, R.; Gu, Y.; Baker, J. S.; Andant, N.; Pereira, B.; Rouffiac, K.; Clinchamps, M.; Dutheil, F.; Mestres, S.; Miele, C.; Navel, V.; Parreira, L.; Boirie, Y.; Bouillon-Minois, J.; Fantini, M. L.; Schmidt, J.; Tubert-Jeannin, S.; Chausse, P.; Dambrun, M.; Droit-Volet, S.; Guegan, J.; Guimond, S.; Mondillon, L.; Nugier, A.; Huguet, P.; Dewavrin, S.; Marhar, F.; Naughton, G.; Benson, A.; Lamm, C.; Drapeau, V.; Avilés Dorlhiac, R.; Bustos, B.; Zhang, H.; Dieckmann, P.; Quach, B.; Duan, Y.; Gao, G.; Huang, W. Y. J.; Lau, K. L. K.; Zhang, C.; Jiao, J.; Chen, K.; Nasir, H.; Cocco, P.; Lecca, R.; Puligheddu, M.; Figorilli, M.; Charkhabi, M.; Pfabigan, D.; Dieckmann, P.; Antunes, S.; Neto, D.; Almeida, P.; Gouveia, M. J.; Quinteiro, P.; Dubuis, B.; Lemaïgnen, J.; Liu, A.; Saadaoui, F. COVID-19 Lockdown Consequences on Body Mass Index and Perceived Fragility Related to Physical Activity: A Worldwide Cohort Study. *Health Expectations* **2022**, *25* (2), 522–531. <https://doi.org/10.1111/hex.13282>.

172. Vacca, M.; De Maria, A.; Mallia, L.; Lombardo, C. Perfectionism and Eating Behavior in the COVID-19 Pandemic. *Front Psychol* **2021**, *12*. <https://doi.org/10.3389/fpsyg.2021.580943>.
173. Valencia, D.; Ghani, S.; Delgadillo, M.; Madhivanan, P.; Krupp, K.; Ruiz, J.; Seixas, A.; Jean-Louis, G.; Killgore, W.; Wills, C.; Grandner, M. 202 COVID-19 Pandemic Sleep Disturbances Related To Dietary Behavior at the US-Mexico Border. *Sleep* **2021**, *44* (Supplement\_2), A81–A81. <https://doi.org/10.1093/sleep/zsab072.201>.
174. Vidal, L.; Brunet, G.; Curutchet, M. R.; Girona, A.; Pardiñas, V.; Guerra, D.; Platero, E.; Machado, L.; González, F.; Gugliucci, V.; Ares, G. Is COVID-19 a Threat or an Opportunity for Healthy Eating? An Exploration of the Factors That Moderate the Impact of the Pandemic on Eating Habits in Uruguay. *Appetite* **2021**, *167*, 105651. <https://doi.org/10.1016/j.appet.2021.105651>.
175. Visser, M.; Schaap, L. A.; Wijnhoven, H. A. H. Self-Reported Impact of the COVID-19 Pandemic on Nutrition and Physical Activity Behaviour in Dutch Older Adults Living Independently. *Nutrients* **2020**, *12* (12), 3708. <https://doi.org/10.3390/nu12123708>.
176. Wang, R.; Ye, B.; Wang, P.; Tang, C.; Yang, Q. Coronavirus Stress and Overeating: The Role of Anxiety and COVID-19 Burnout. *J Eat Disord* **2022**, *10* (1). <https://doi.org/10.1186/s40337-022-00584-z>.
177. Yang, S.; Guo, B.; Ao, L.; Yang, C.; Zhang, L.; Zhou, J.; Jia, P. Obesity and Activity Patterns before and during <sc>COVID</Sc> -19 Lockdown among Youths in China. *Clin Obes* **2020**, *10* (6). <https://doi.org/10.1111/cob.12416>.
178. Yılmaz Akyüz, E.; Yılmaz Onal, H.; Yuksel, A. Nutritional Habits and Emotional Eating of Adults during Social Isolation Days Due to Covid-19 Pandemic. *Progress in Health Sciences* **2021**, *11* (1), 43–56. <https://doi.org/10.5604/01.3001.0014.9280>.
179. Yılmaz, S.; Sanlier, N.; Göbel, P.; Açıklın, B.; Kocabas, S.; Dundar, A. The Dark Side of the Quarantine: Night Eating, Sleep Quality and the Health Locus of Control in Women. *Nutr Food Sci* **2022**, *52* (4), 627–640. <https://doi.org/10.1108/NFS-08-2021-0246>.
180. Yokoro, M.; Wakimoto, K.; Otaki, N.; Fukuo, K. Increased Prevalence of Breakfast Skipping in Female College Students in COVID-19. *Asia Pacific Journal of Public Health* **2021**, *33* (4), 438–440. <https://doi.org/10.1177/1010539521998861>.
181. Zach, S.; Fernandez-Rio, J.; Zeev, A.; Ophir, M.; Eilat-Adar, S. Physical Activity, Resilience, Emotions, Moods, and Weight Control, during the COVID-19 Global Crisis. *Isr J Health Policy Res* **2021**, *10* (1), 52. <https://doi.org/10.1186/s13584-021-00473-x>.
182. Zachary, Z.; Brianna, F.; Brianna, L.; Garrett, P.; Jade, W.; Alyssa, D.; Mikayla, K. Self-Quarantine and Weight Gain Related Risk Factors during the COVID-19 Pandemic. *Obes Res Clin Pract* **2020**, *14* (3), 210–216. <https://doi.org/10.1016/j.orcp.2020.05.004>.
183. Zhang, J.; Zhang, Y.; Huo, S.; Ma, Y.; Ke, Y.; Wang, P.; Zhao, A. Emotional Eating in Pregnant Women during the COVID-19 Pandemic and Its Association with Dietary Intake and Gestational Weight Gain. *Nutrients* **2020**, *12* (8), 2250. <https://doi.org/10.3390/nu12082250>.
184. Zhou, Y.; Wade, T. D. The Impact of <sc>COVID</Sc> -19 on Body-dissatisfied Female University Students. *International Journal of Eating Disorders* **2021**, *54* (7), 1283–1288. <https://doi.org/10.1002/eat.23521>.
185. Zhu, Q.; Li, M.; Ji, Y.; Shi, Y.; Zhou, J.; Li, Q.; Qin, R.; Zhuang, X. “Stay-at-Home” Lifestyle Effect on Weight Gain during the COVID-19 Outbreak Confinement in China. *Int J Environ Res Public Health* **2021**, *18* (4), 1813. <https://doi.org/10.3390/ijerph18041813>.
186. Zielińska, M.; Łuszczki, E.; Bartosiewicz, A.; Wyszowska, J.; Dereń, K. The Prevalence of “Food Addiction” during the COVID-19 Pandemic Measured Using the Yale Food Addiction Scale 2.0 (YFAS 2.0) among the Adult Population of Poland. *Nutrients* **2021**, *13* (11), 4115. <https://doi.org/10.3390/nu13114115>.
